# Supplementary material for: The disulfide bond as a key motif for the construction of multivalent glycoclusters
Source: Royal Society of Chemistry journal article supplement (doi:10.1039/d2nj03071c), 2022-01-01

## Supplementary Information

# The disulfide bond as a key motif in the construction of multivalent ligands

María Emilia Cano<sup>1,2\*</sup>, Walter Emiliano Jara<sup>1,2</sup>, Alejandro J. Cagnoni<sup>3</sup>, Emmanuel Brizzio<sup>1,2</sup>, Miriam C. Strumia<sup>4</sup>, Evangelina Repetto<sup>1,2\*</sup> and María Laura Uhrig<sup>1,2\*</sup>.

<sup>1</sup> Departamento de Química Orgánica, Facultad de Ciencias Exactas y Naturales, Universidad de Buenos Aires, Ciudad Universitaria, Pabellón 2, C1428EGA Buenos Aires, Argentina

<sup>2</sup> CONICET-Universidad de Buenos Aires, Centro de Investigaciones en Hidratos de Carbono (CIHIDECAR), C1428EGA Buenos Aires, Argentina

<sup>3</sup> Laboratorio de Glicómica Funcional y Molecular, Instituto de Biología y Medicina Experimental, Consejo Nacional de Investigaciones Científicas y Técnicas, C1428ADN Buenos Aires, Argentina.

<sup>4</sup> IPQA-CONICET. Universidad Nacional de Córdoba. Facultad de Ciencias Químicas, Dpto. Química Orgánica

\* Corresponding authors, email adress: [mluhrig@qo.fcen.uba.ar](mailto:mluhrig@qo.fcen.uba.ar); [mecano@qo.fcen.uba.ar](mailto:mecano@qo.fcen.uba.ar); [erepetto@qo.fcen.uba.ar](mailto:erepetto@qo.fcen.uba.ar).

ORCID:

María Laura Uhrig: 0000-0002-6980-4141

Evangelina Repetto: 0000-0003-4806-1542

María Emilia Cano: 0000-0001-9063-4573

## **Table of contents**

|                                                                                                                          |           |
|--------------------------------------------------------------------------------------------------------------------------|-----------|
| ITC experiments: Figures S1–S4                                                                                           | Page 3-4  |
| NMR spectra of compounds <b>4, 5, 6, 8, 12, 13, 14, 16, 17, 18, 19, 20, 21, 22, 23, 25, 26, 27, 28, 29</b> and <b>30</b> | Page 5-56 |

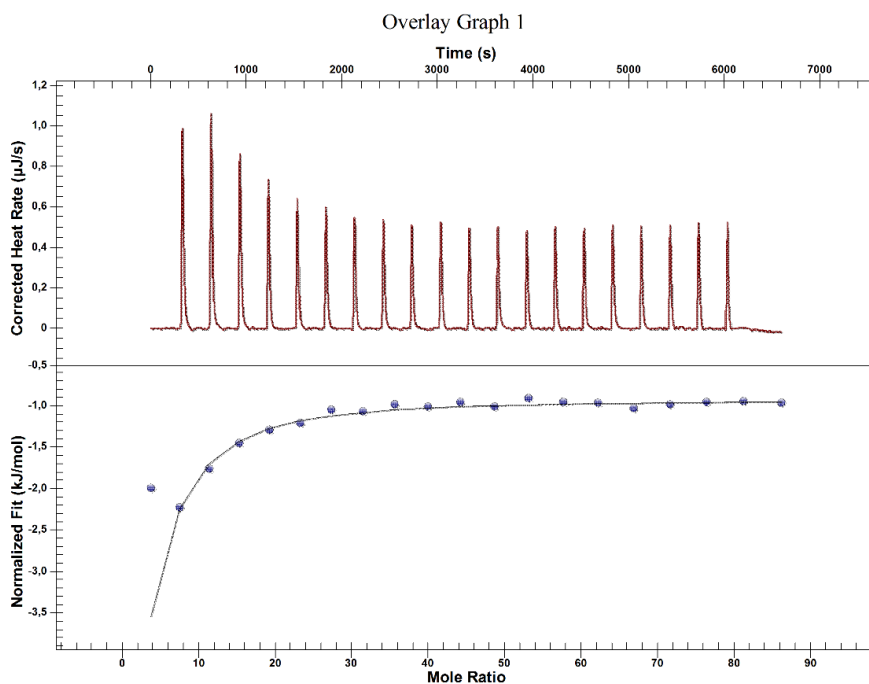

**Figure S1.** Experimental calorimetric data associated with the isothermal titration at 298 K of hGal-3 with lactose.

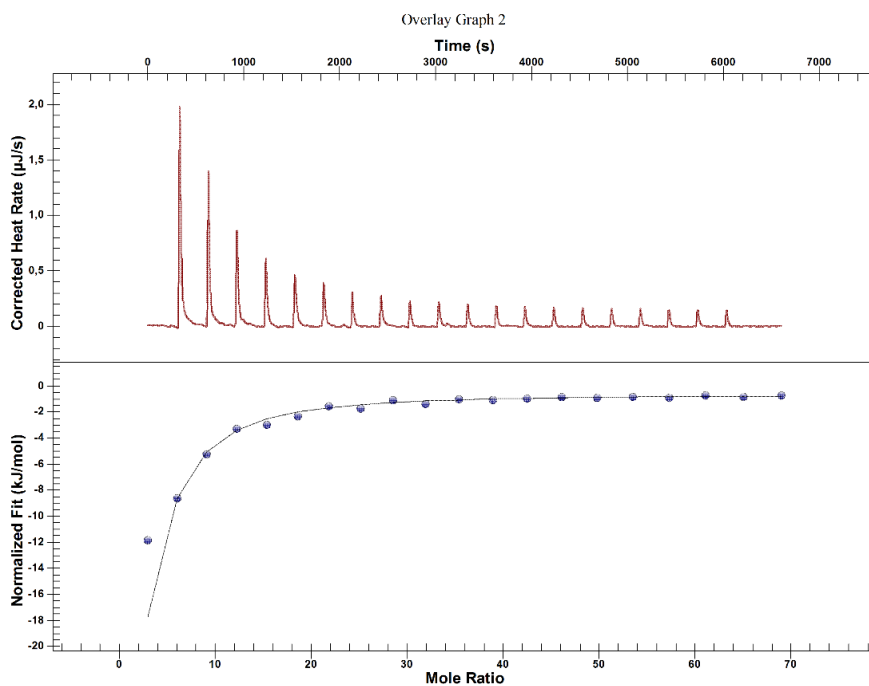

**Figure S2.** Experimental calorimetric data associated with the isothermal titration at 298 K of hGal-3 with compound **22**.

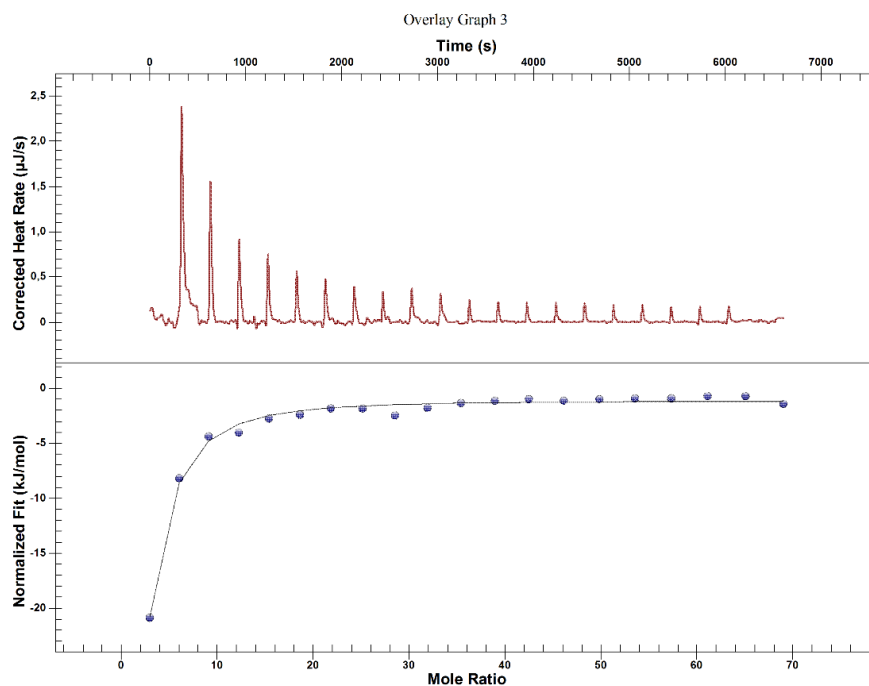

**Figure S3.** Experimental calorimetric data associated with the isothermal titration at 298 K of hGal-3 with compound **23**.

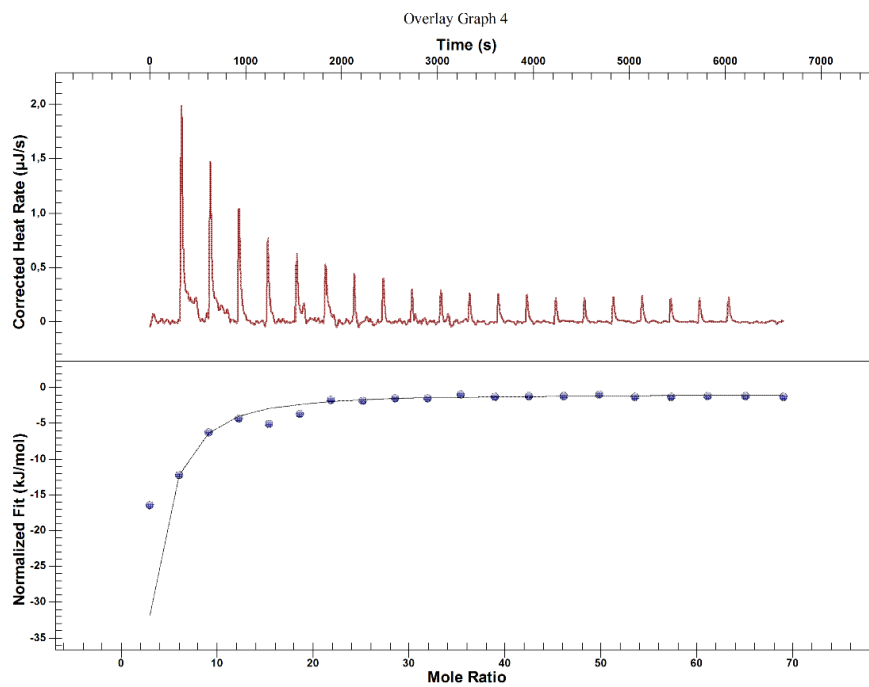

**Figure S4.** Experimental calorimetric data associated with the isothermal titration at 298 K of hGal-3 with compound **29**.

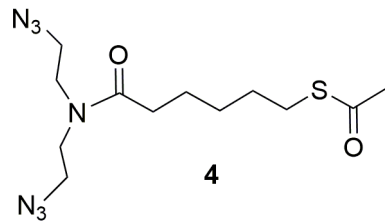

3.51  
3.50  
3.49  
3.48  
3.46  
3.45

2.85  
2.84  
2.82

2.36  
2.34  
2.33

1.65  
1.64  
1.62  
1.59  
1.57  
1.56

1.40  
1.38  
1.37

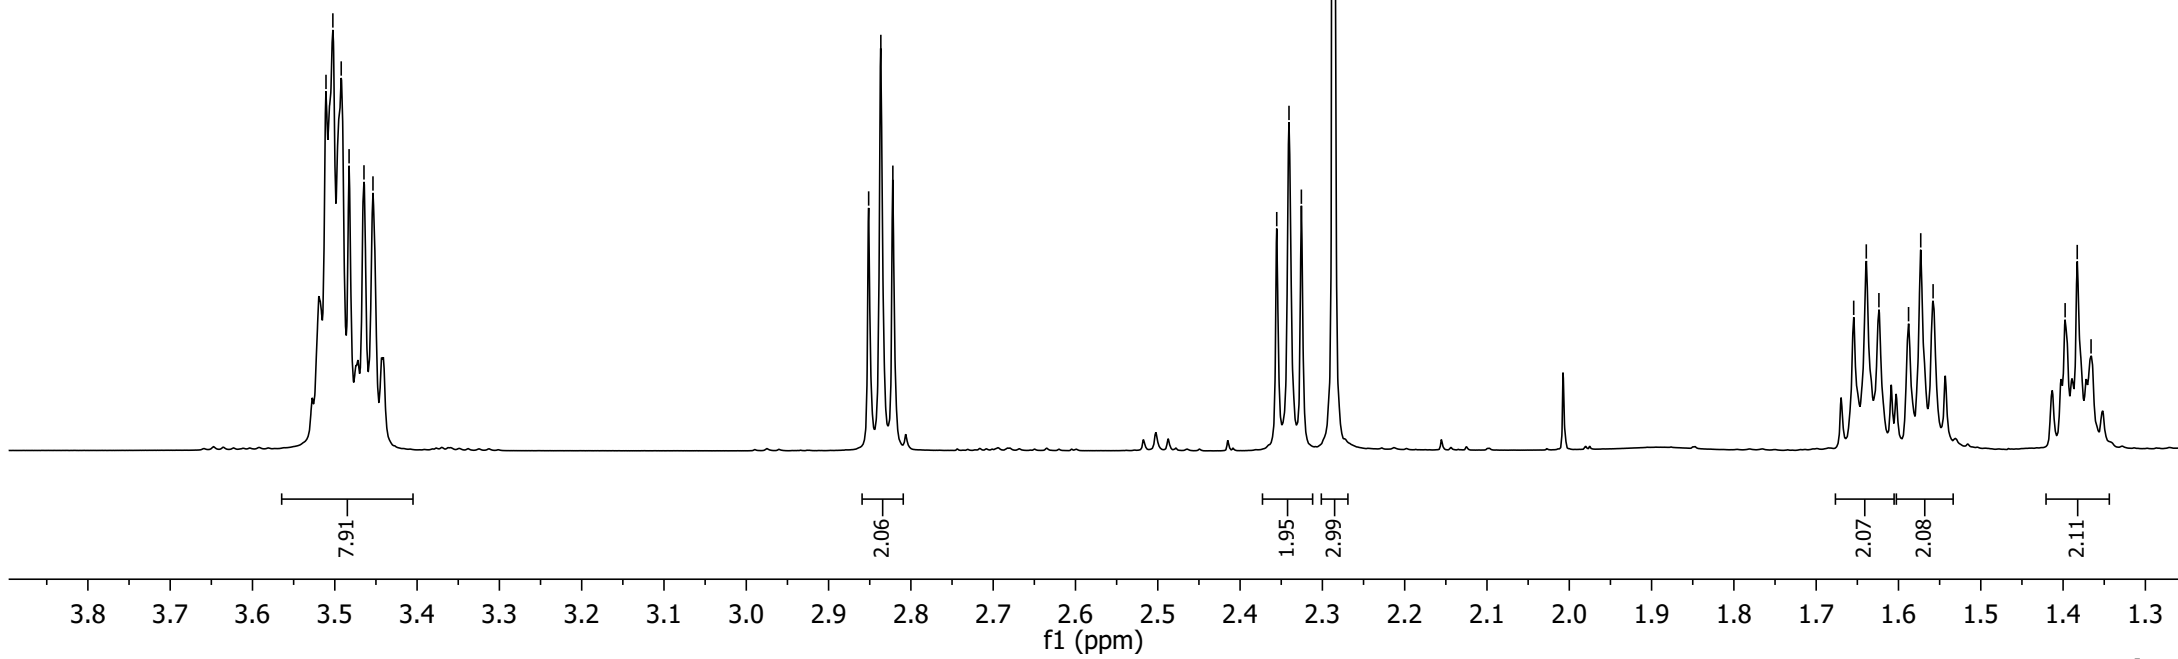

—196.00

—173.38

50.03  
49.61  
48.23  
46.36

32.88  
30.69  
29.40  
28.92  
28.44  
24.53

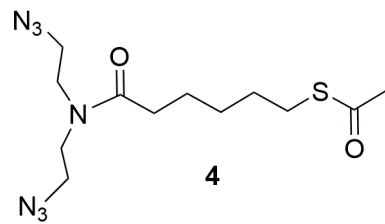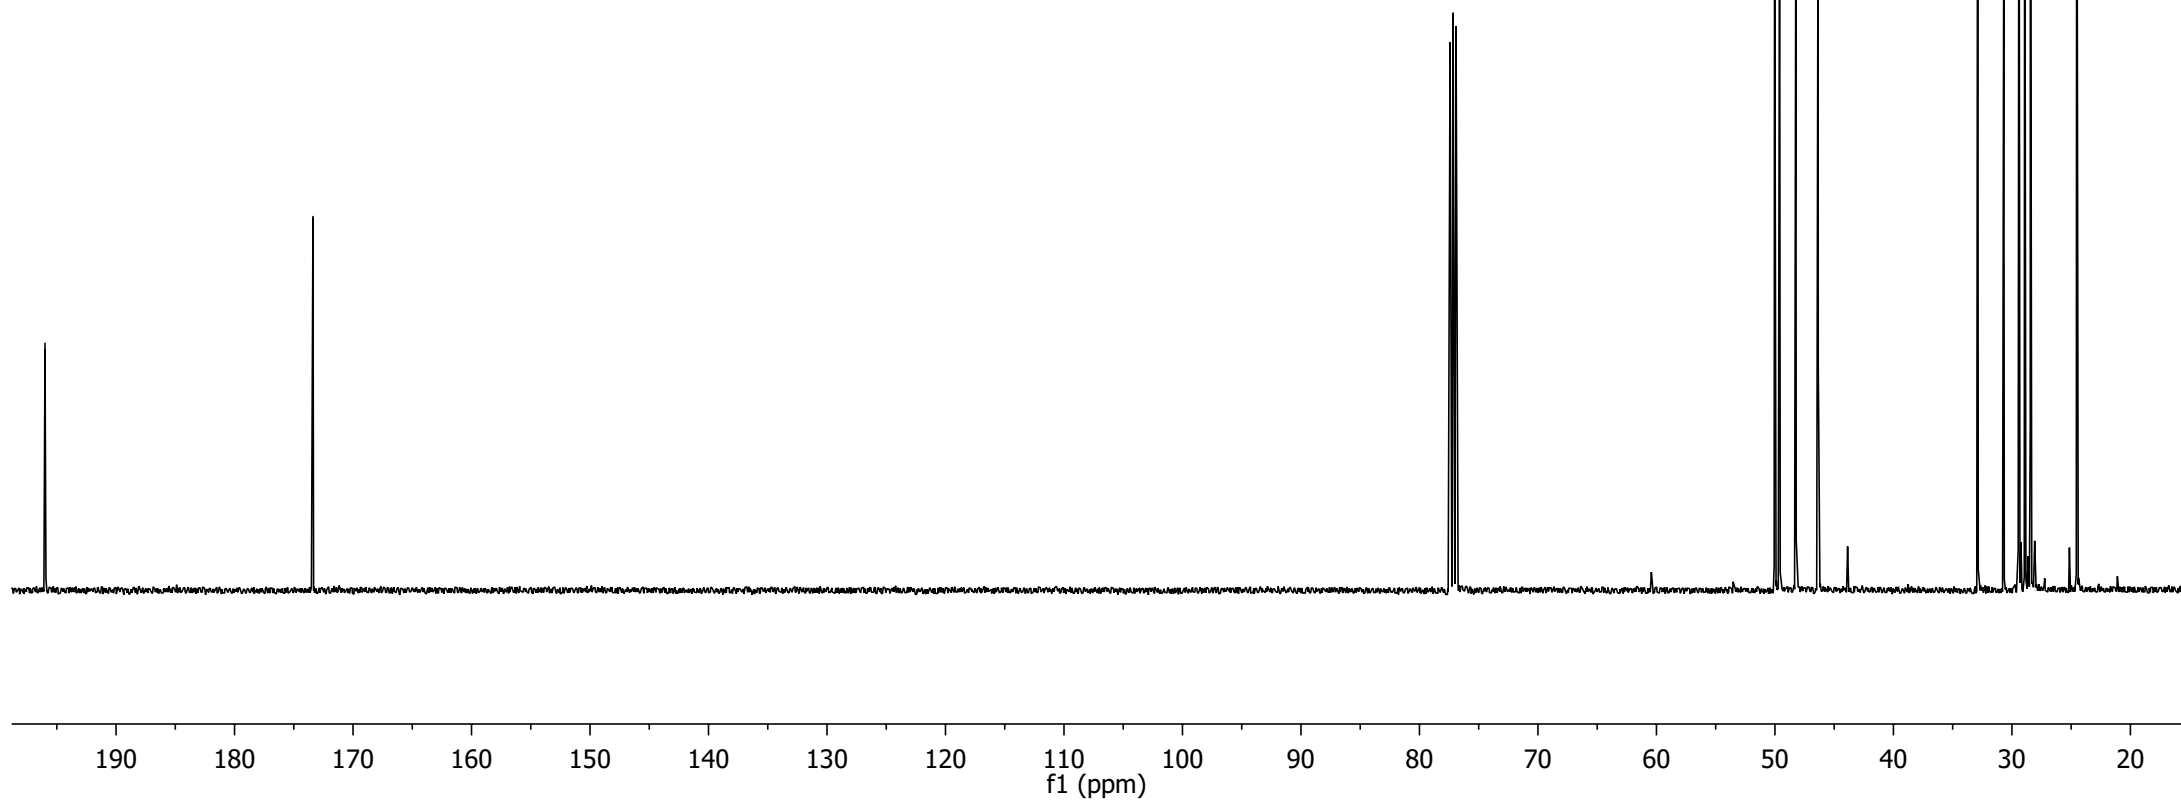

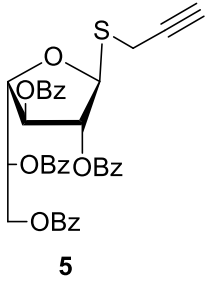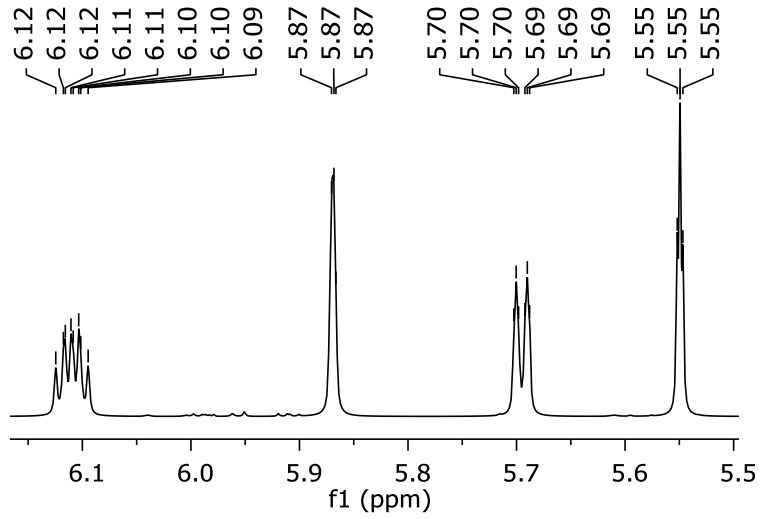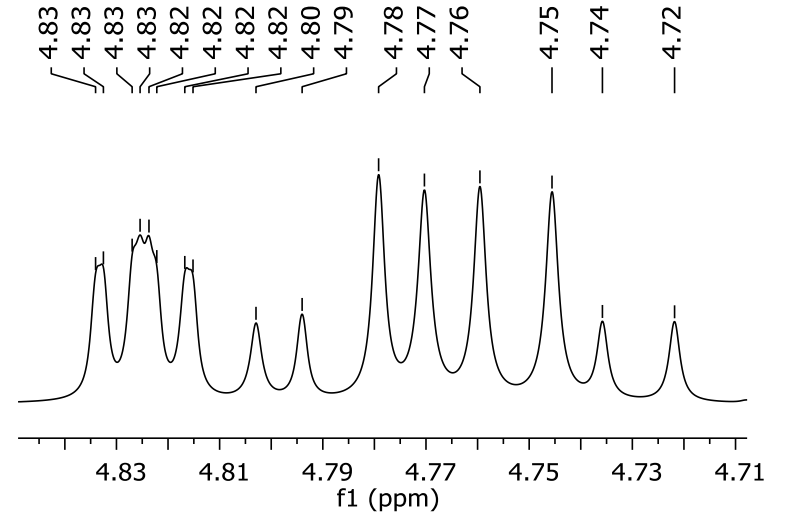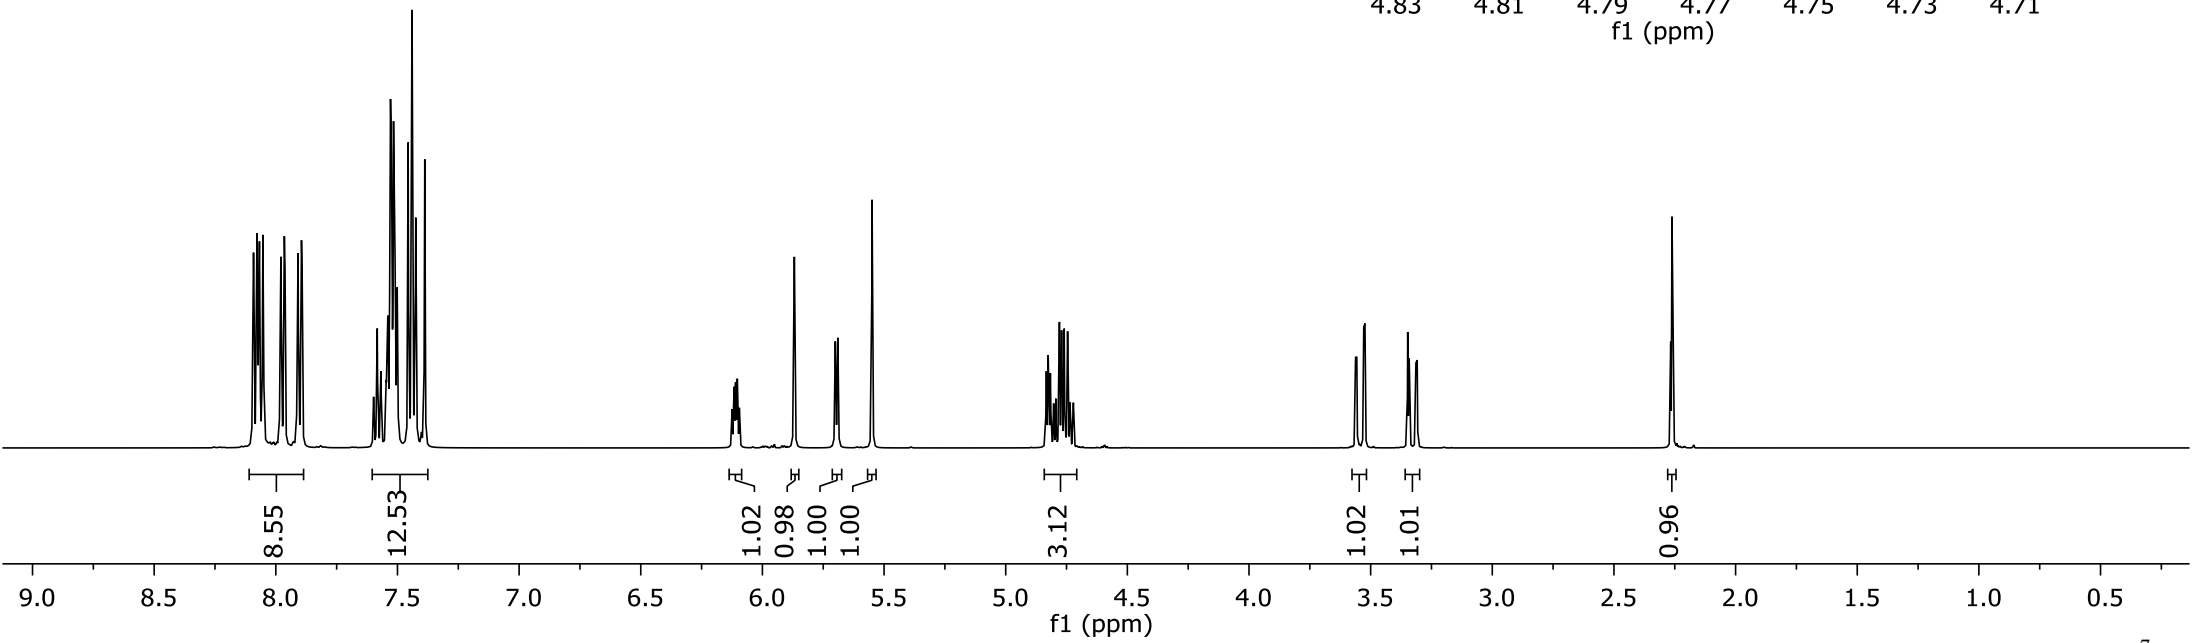

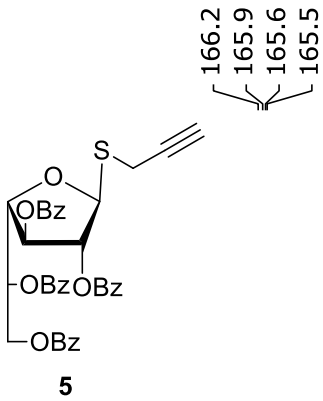

166.2  
165.9  
165.6  
165.5

— 133.8

— 128.4

87.7

82.5

81.8

79.3

78.1

77.2 CDCl<sub>3</sub>

71.9

70.3

— 63.7

— 18.5

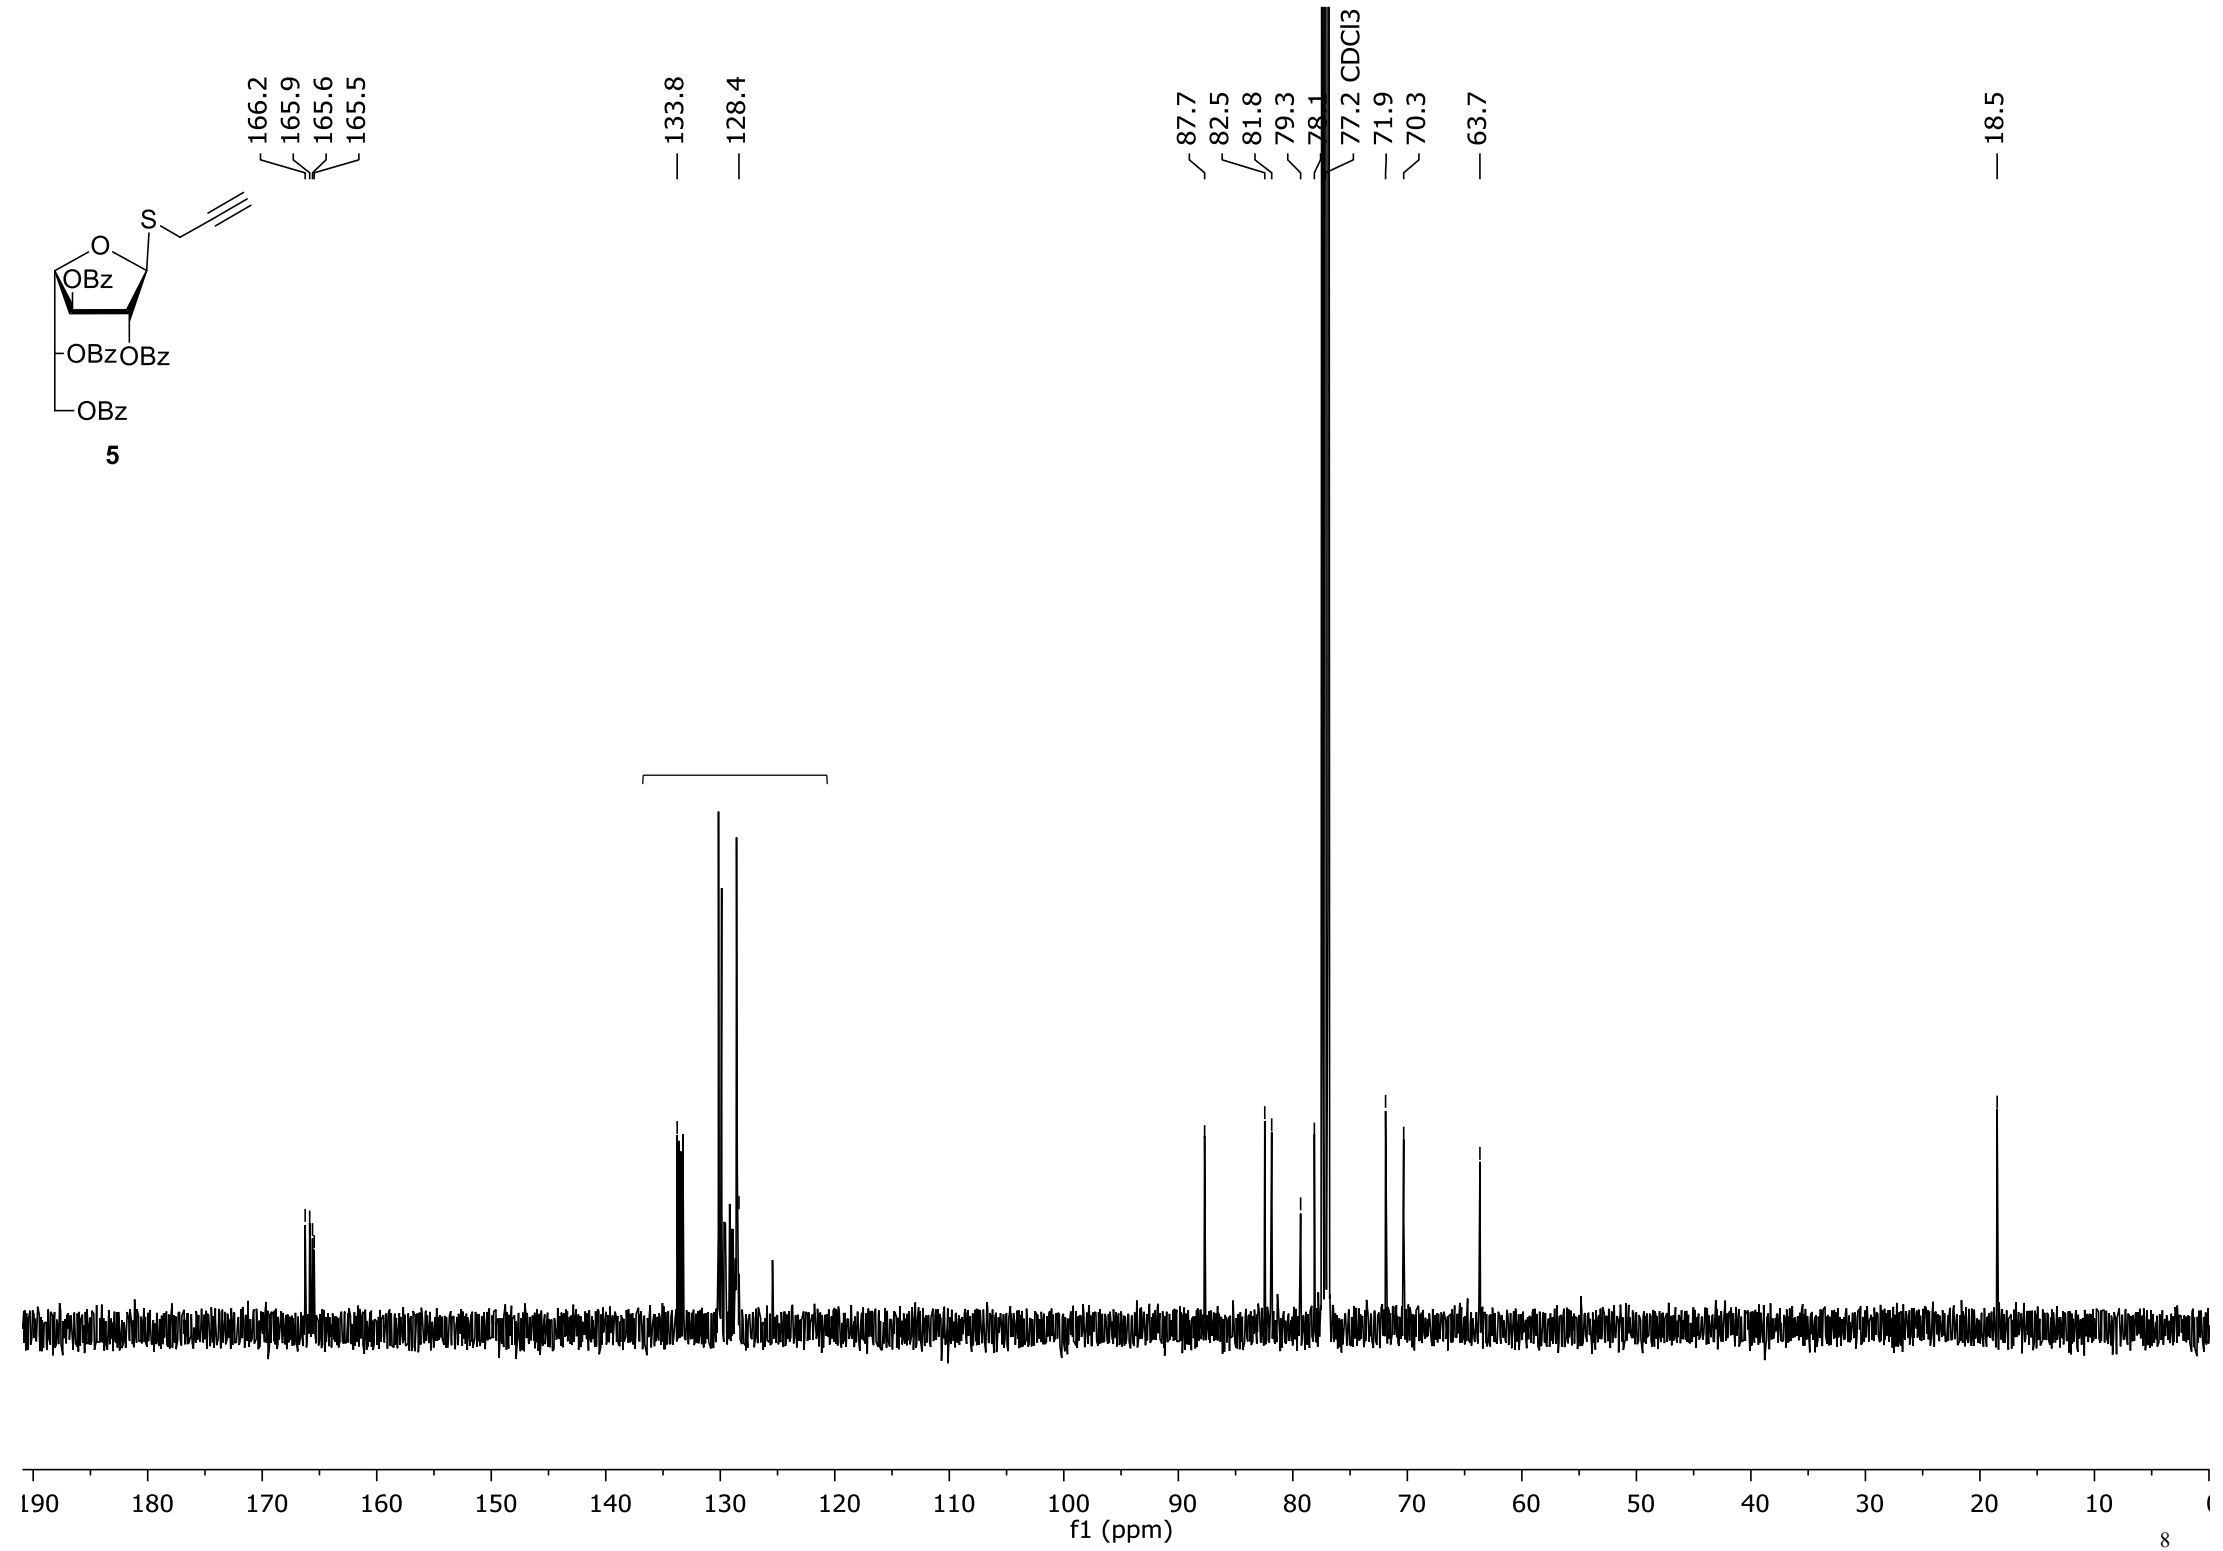



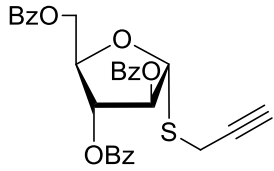

6

— 7.26 CDCl<sub>3</sub>

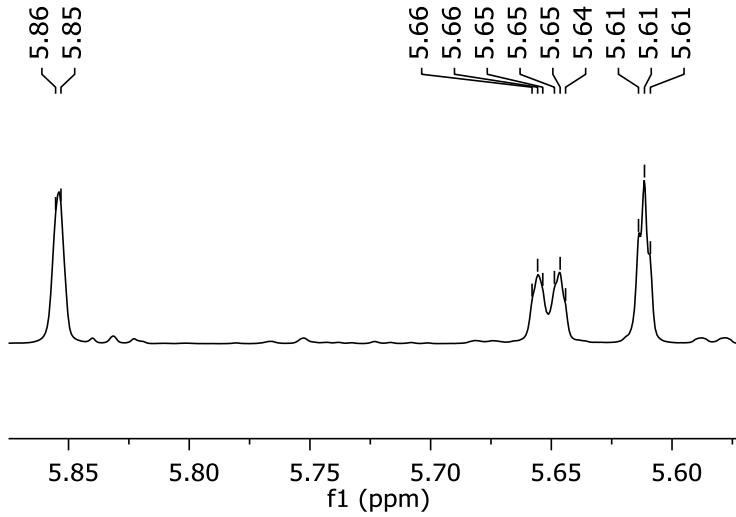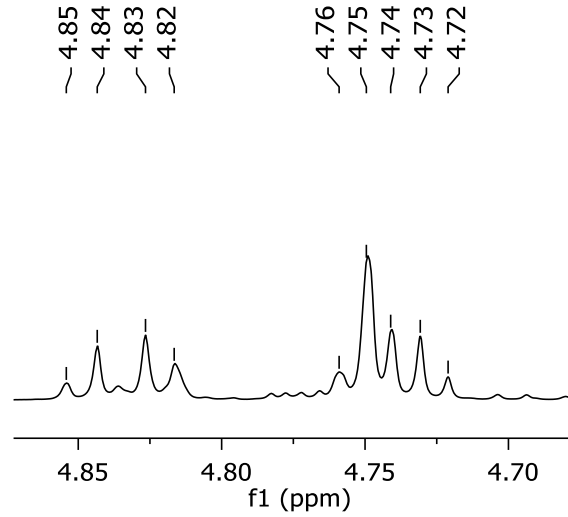

3.60  
3.59  
3.57  
3.56  
3.38  
3.37  
3.34  
3.34

2.27  
2.26  
2.26

— 1.60

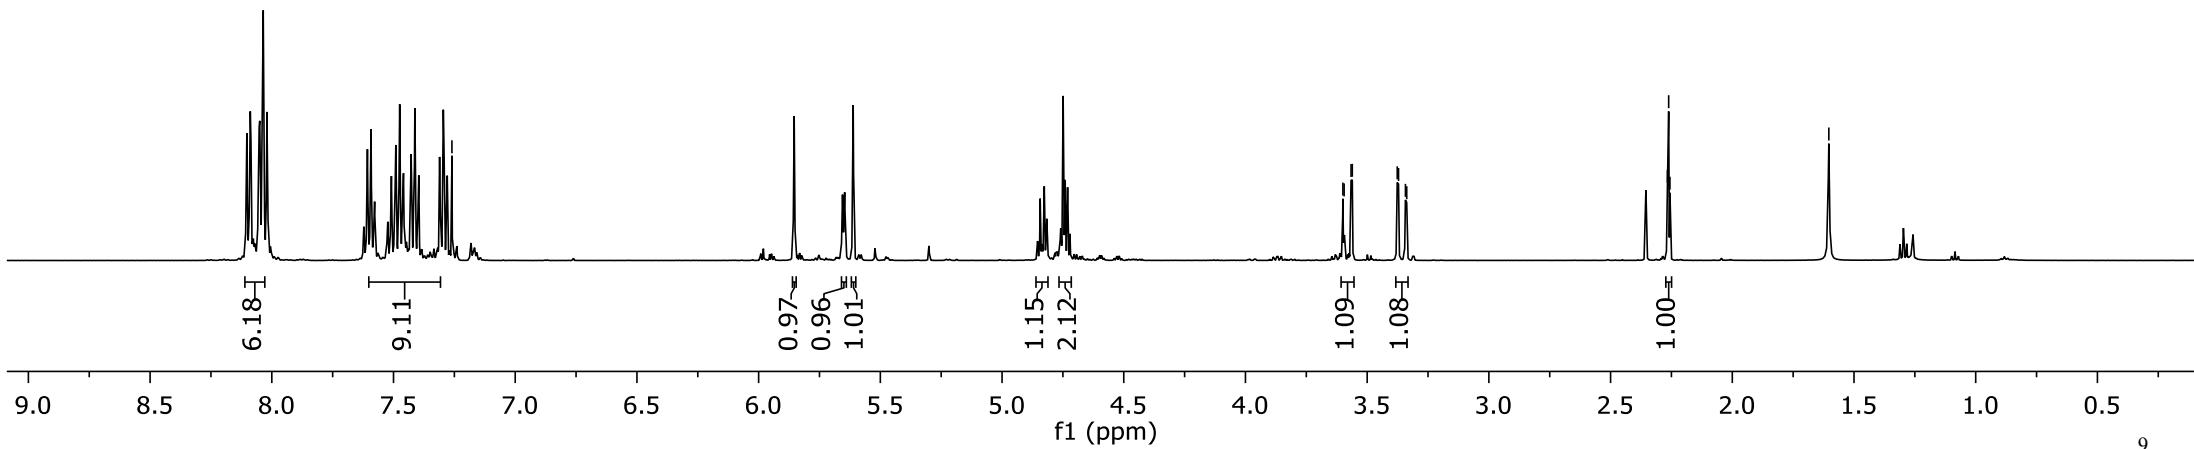

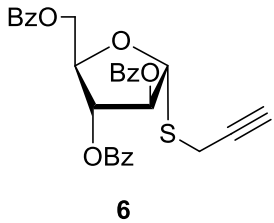

166.3  
165.7  
165.5

133.8  
128.5

87.6  
82.6  
81.4  
79.3  
78.3  
77.2 CDCl<sub>3</sub>  
71.9

63.6

18.5

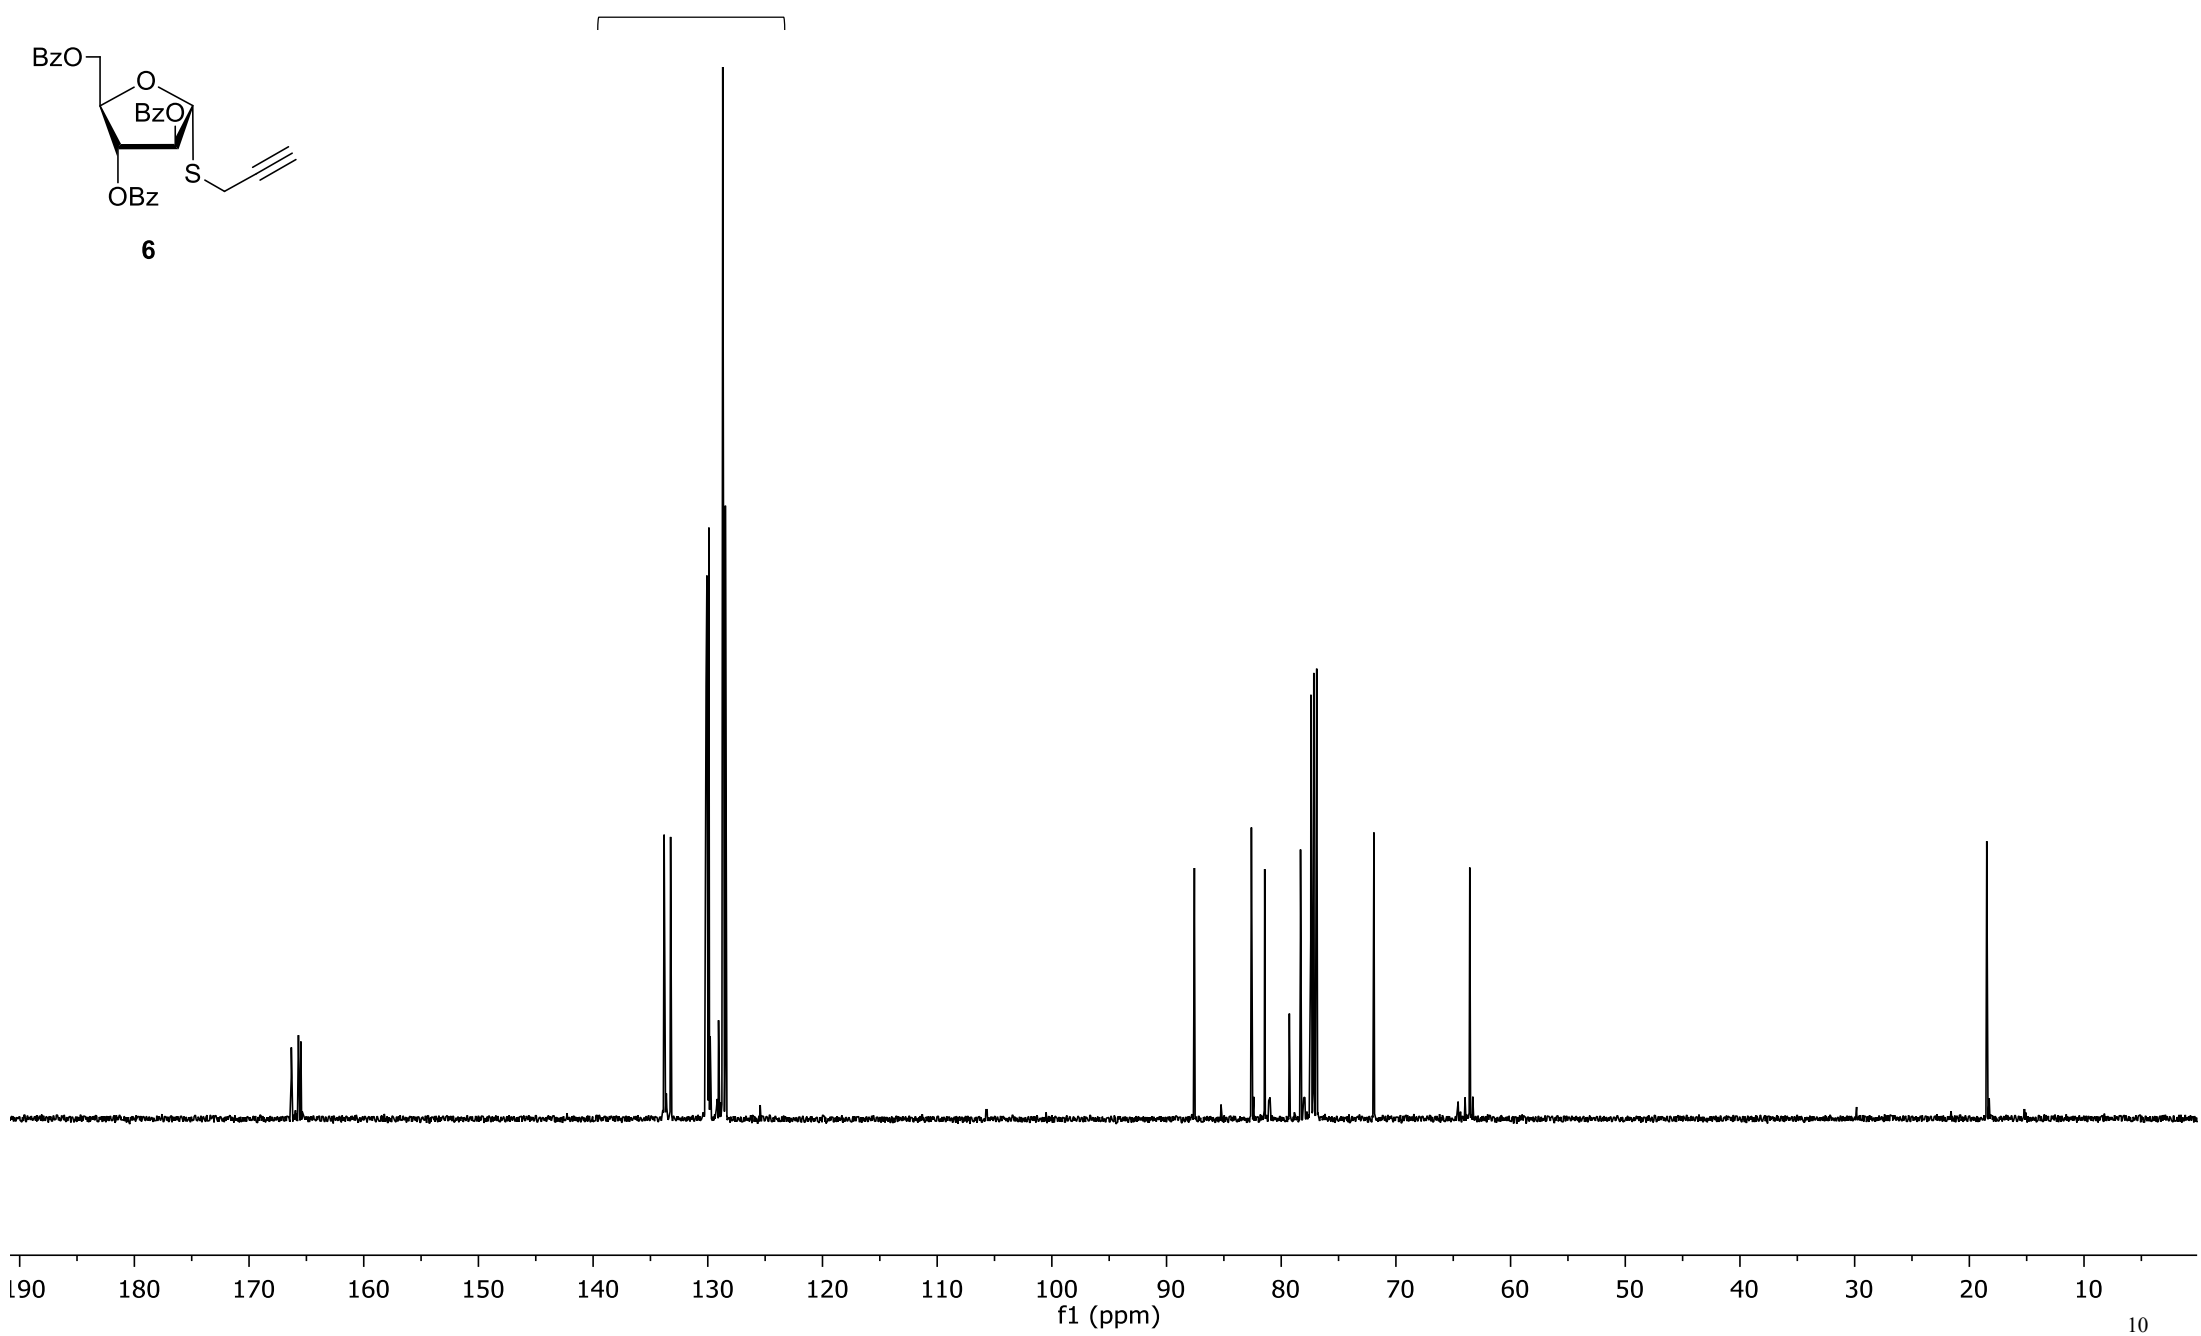

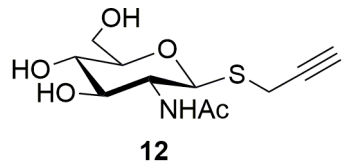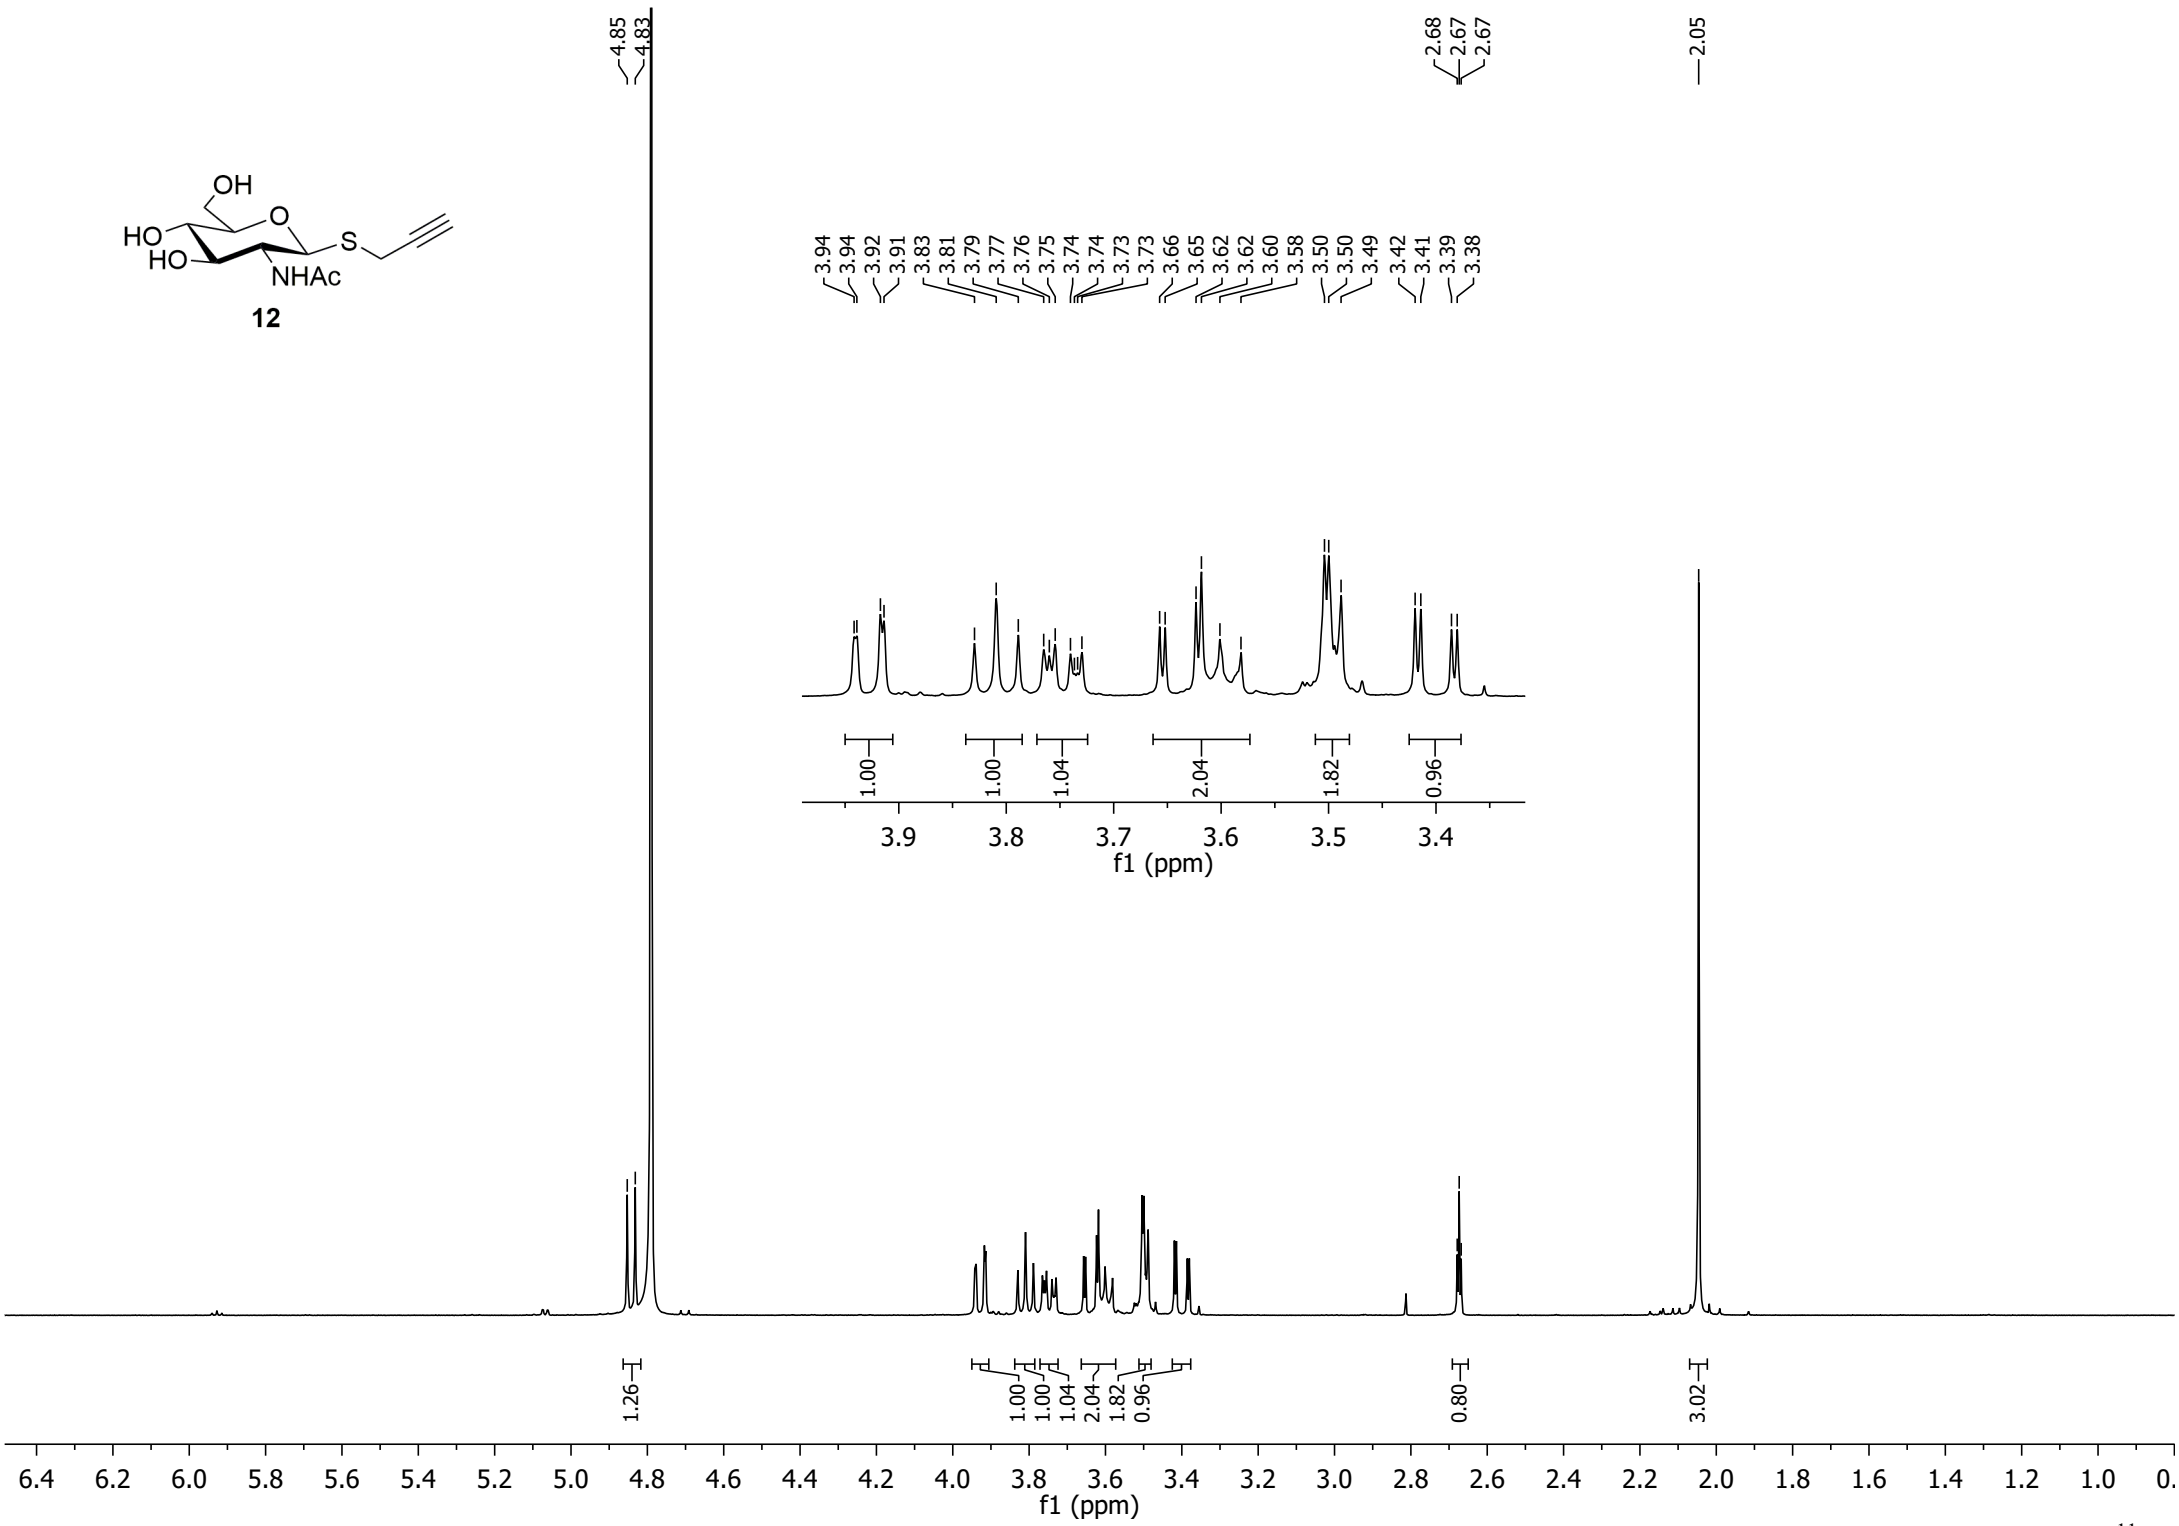

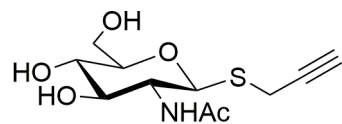

12

—174.5

~83.2

~80.1

~79.9

~75.0

~72.3

~69.7

—60.8

—54.3

—22.1

—17.5

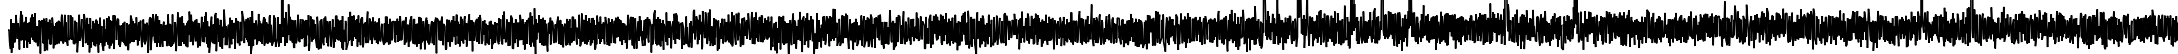

190 180 170 160 150 140 130 120 110 100 90 80 70 60 50 40 30 20 10 0

f1 (ppm)

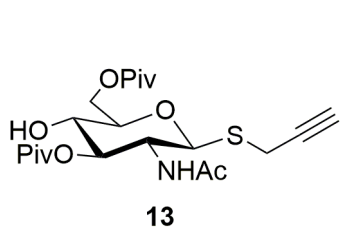

5.03  
5.02  
5.01  
5.00

4.72  
4.70

4.40  
4.39  
4.39

4.20  
4.18  
4.16  
4.16  
4.14

3.60  
3.59  
3.57  
3.56  
3.56  
3.56  
3.54

3.28  
3.27  
3.24  
3.24

2.24  
2.23  
2.23

5.73  
5.71

2.99

1.94

1.23  
1.20

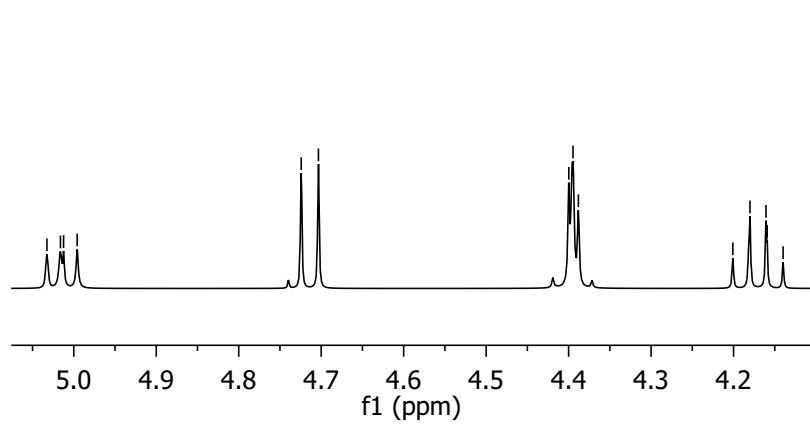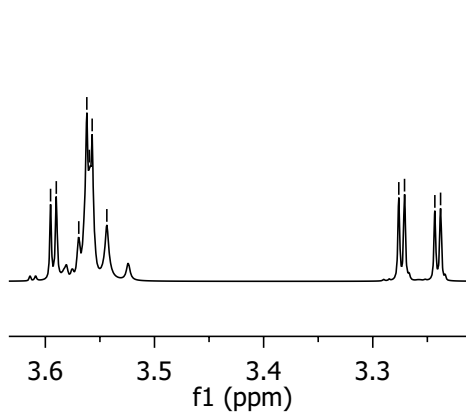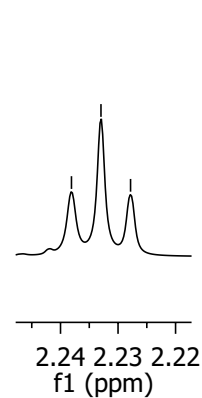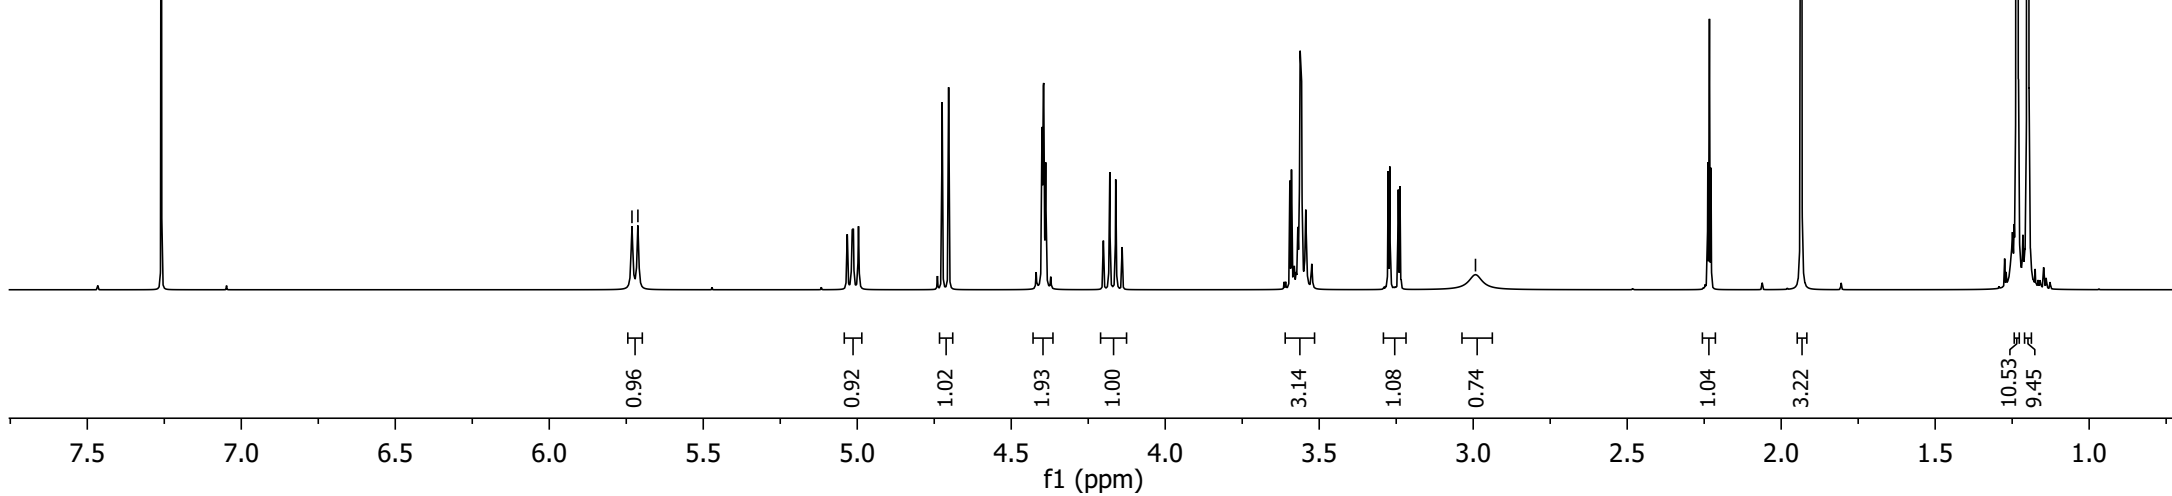

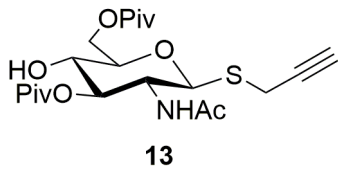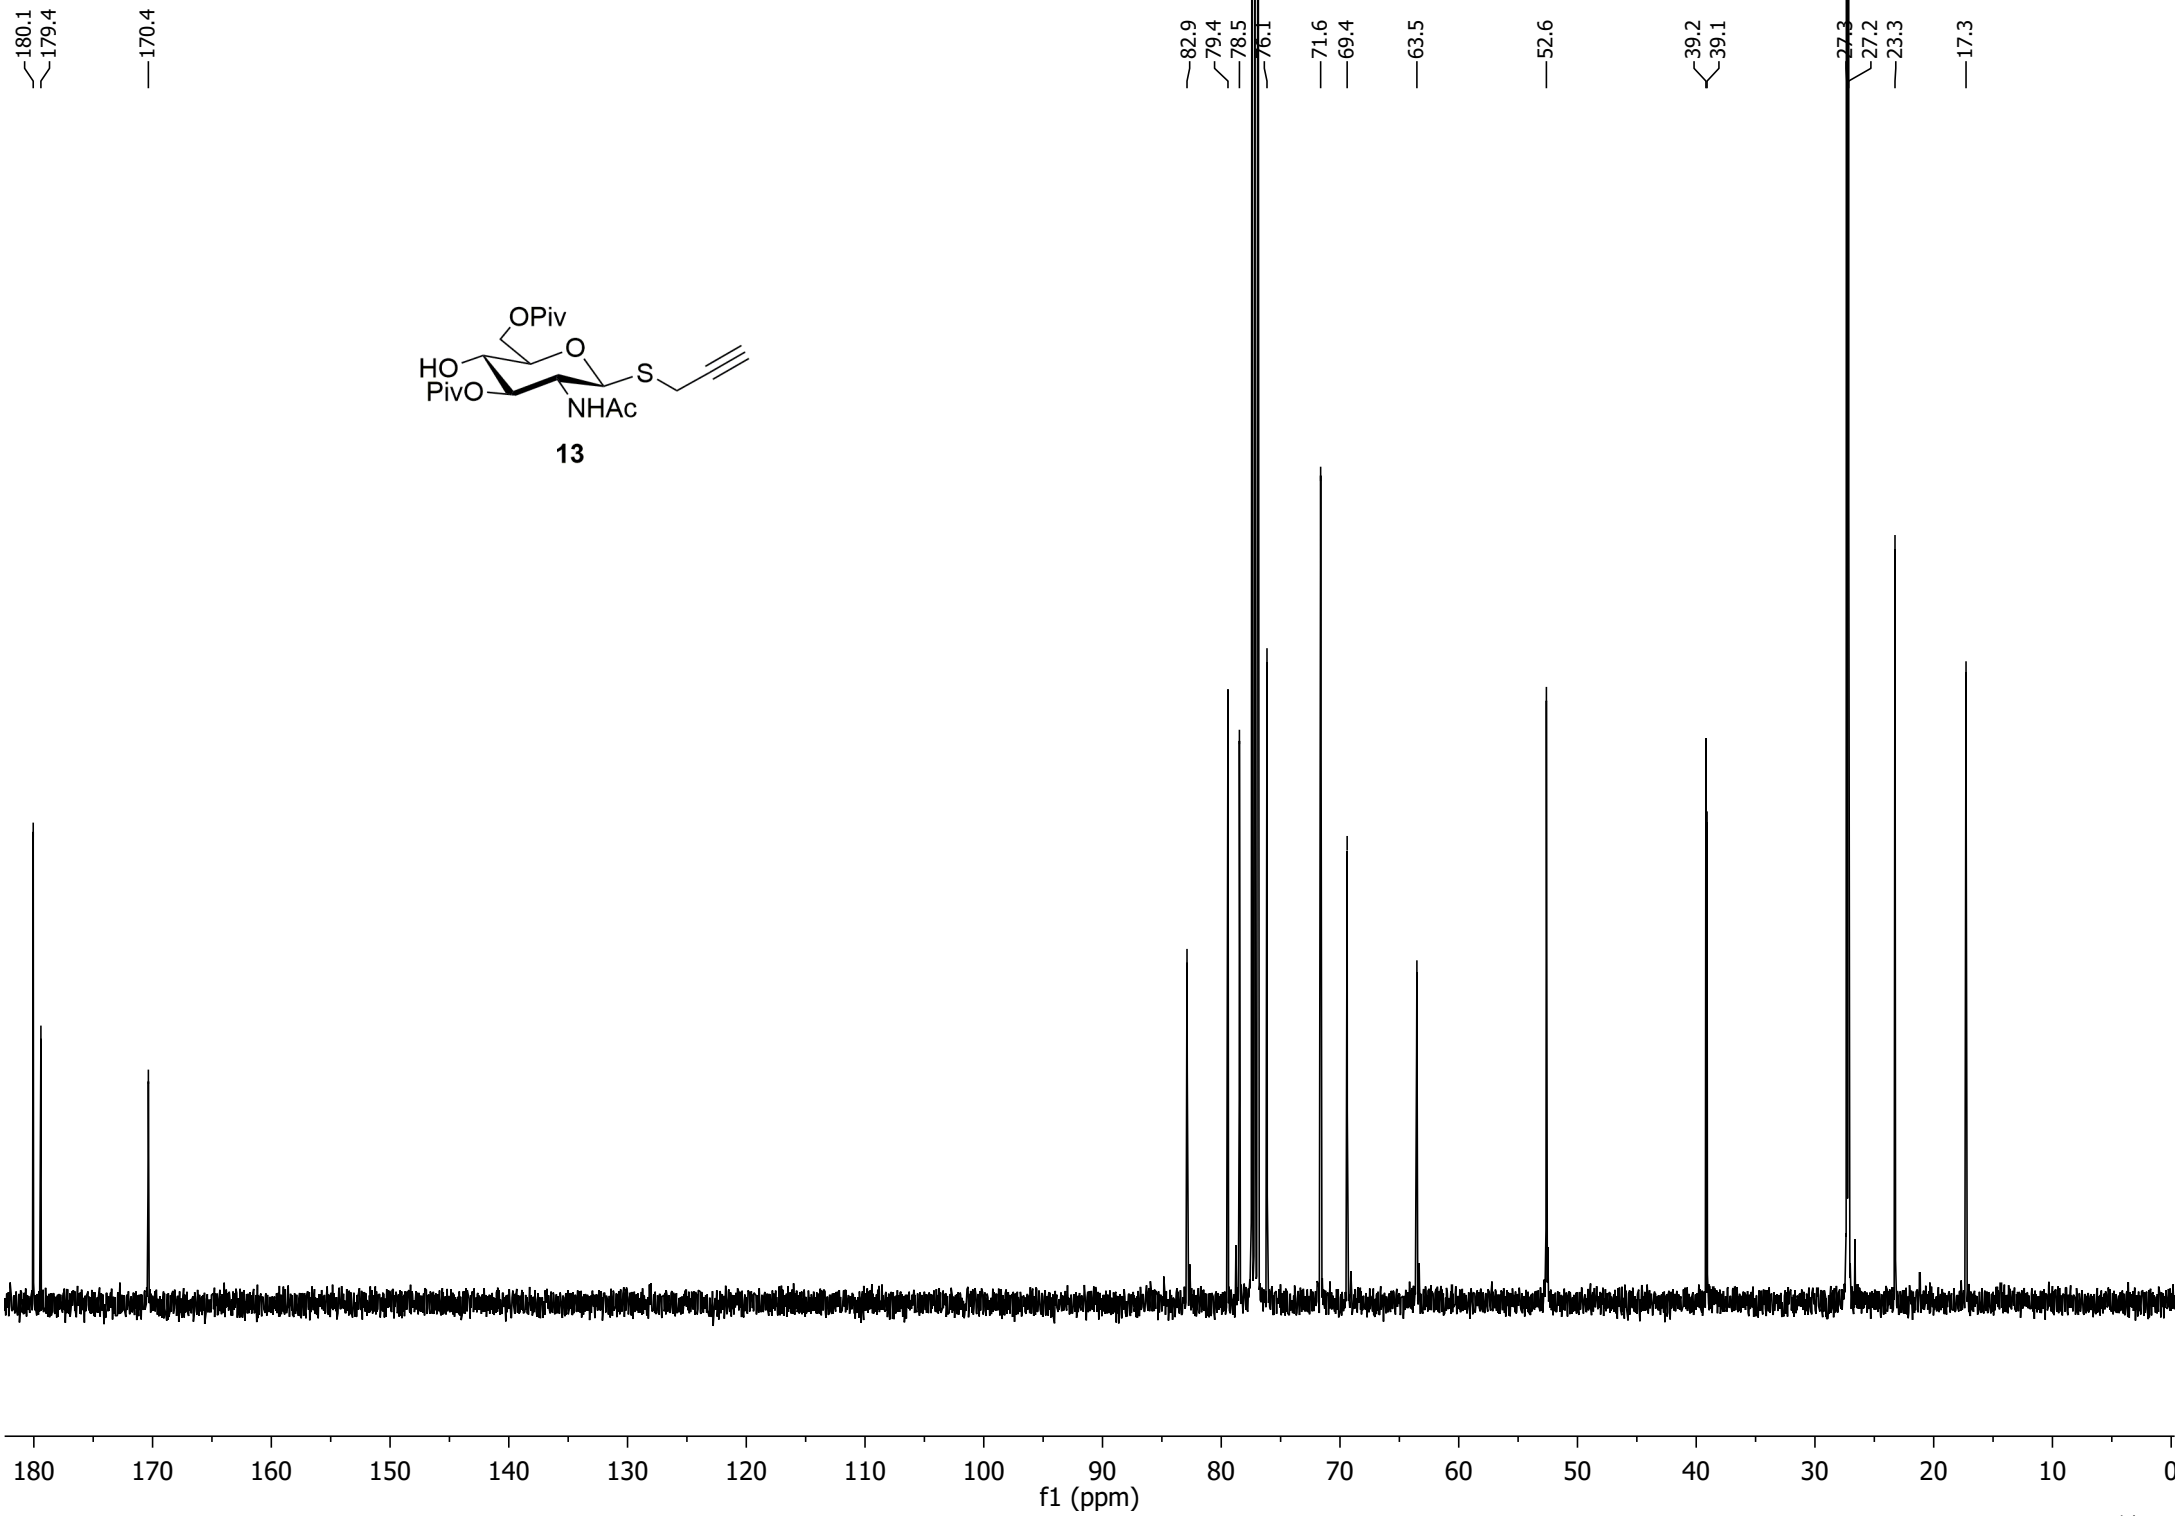

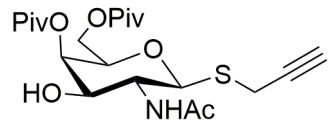

14

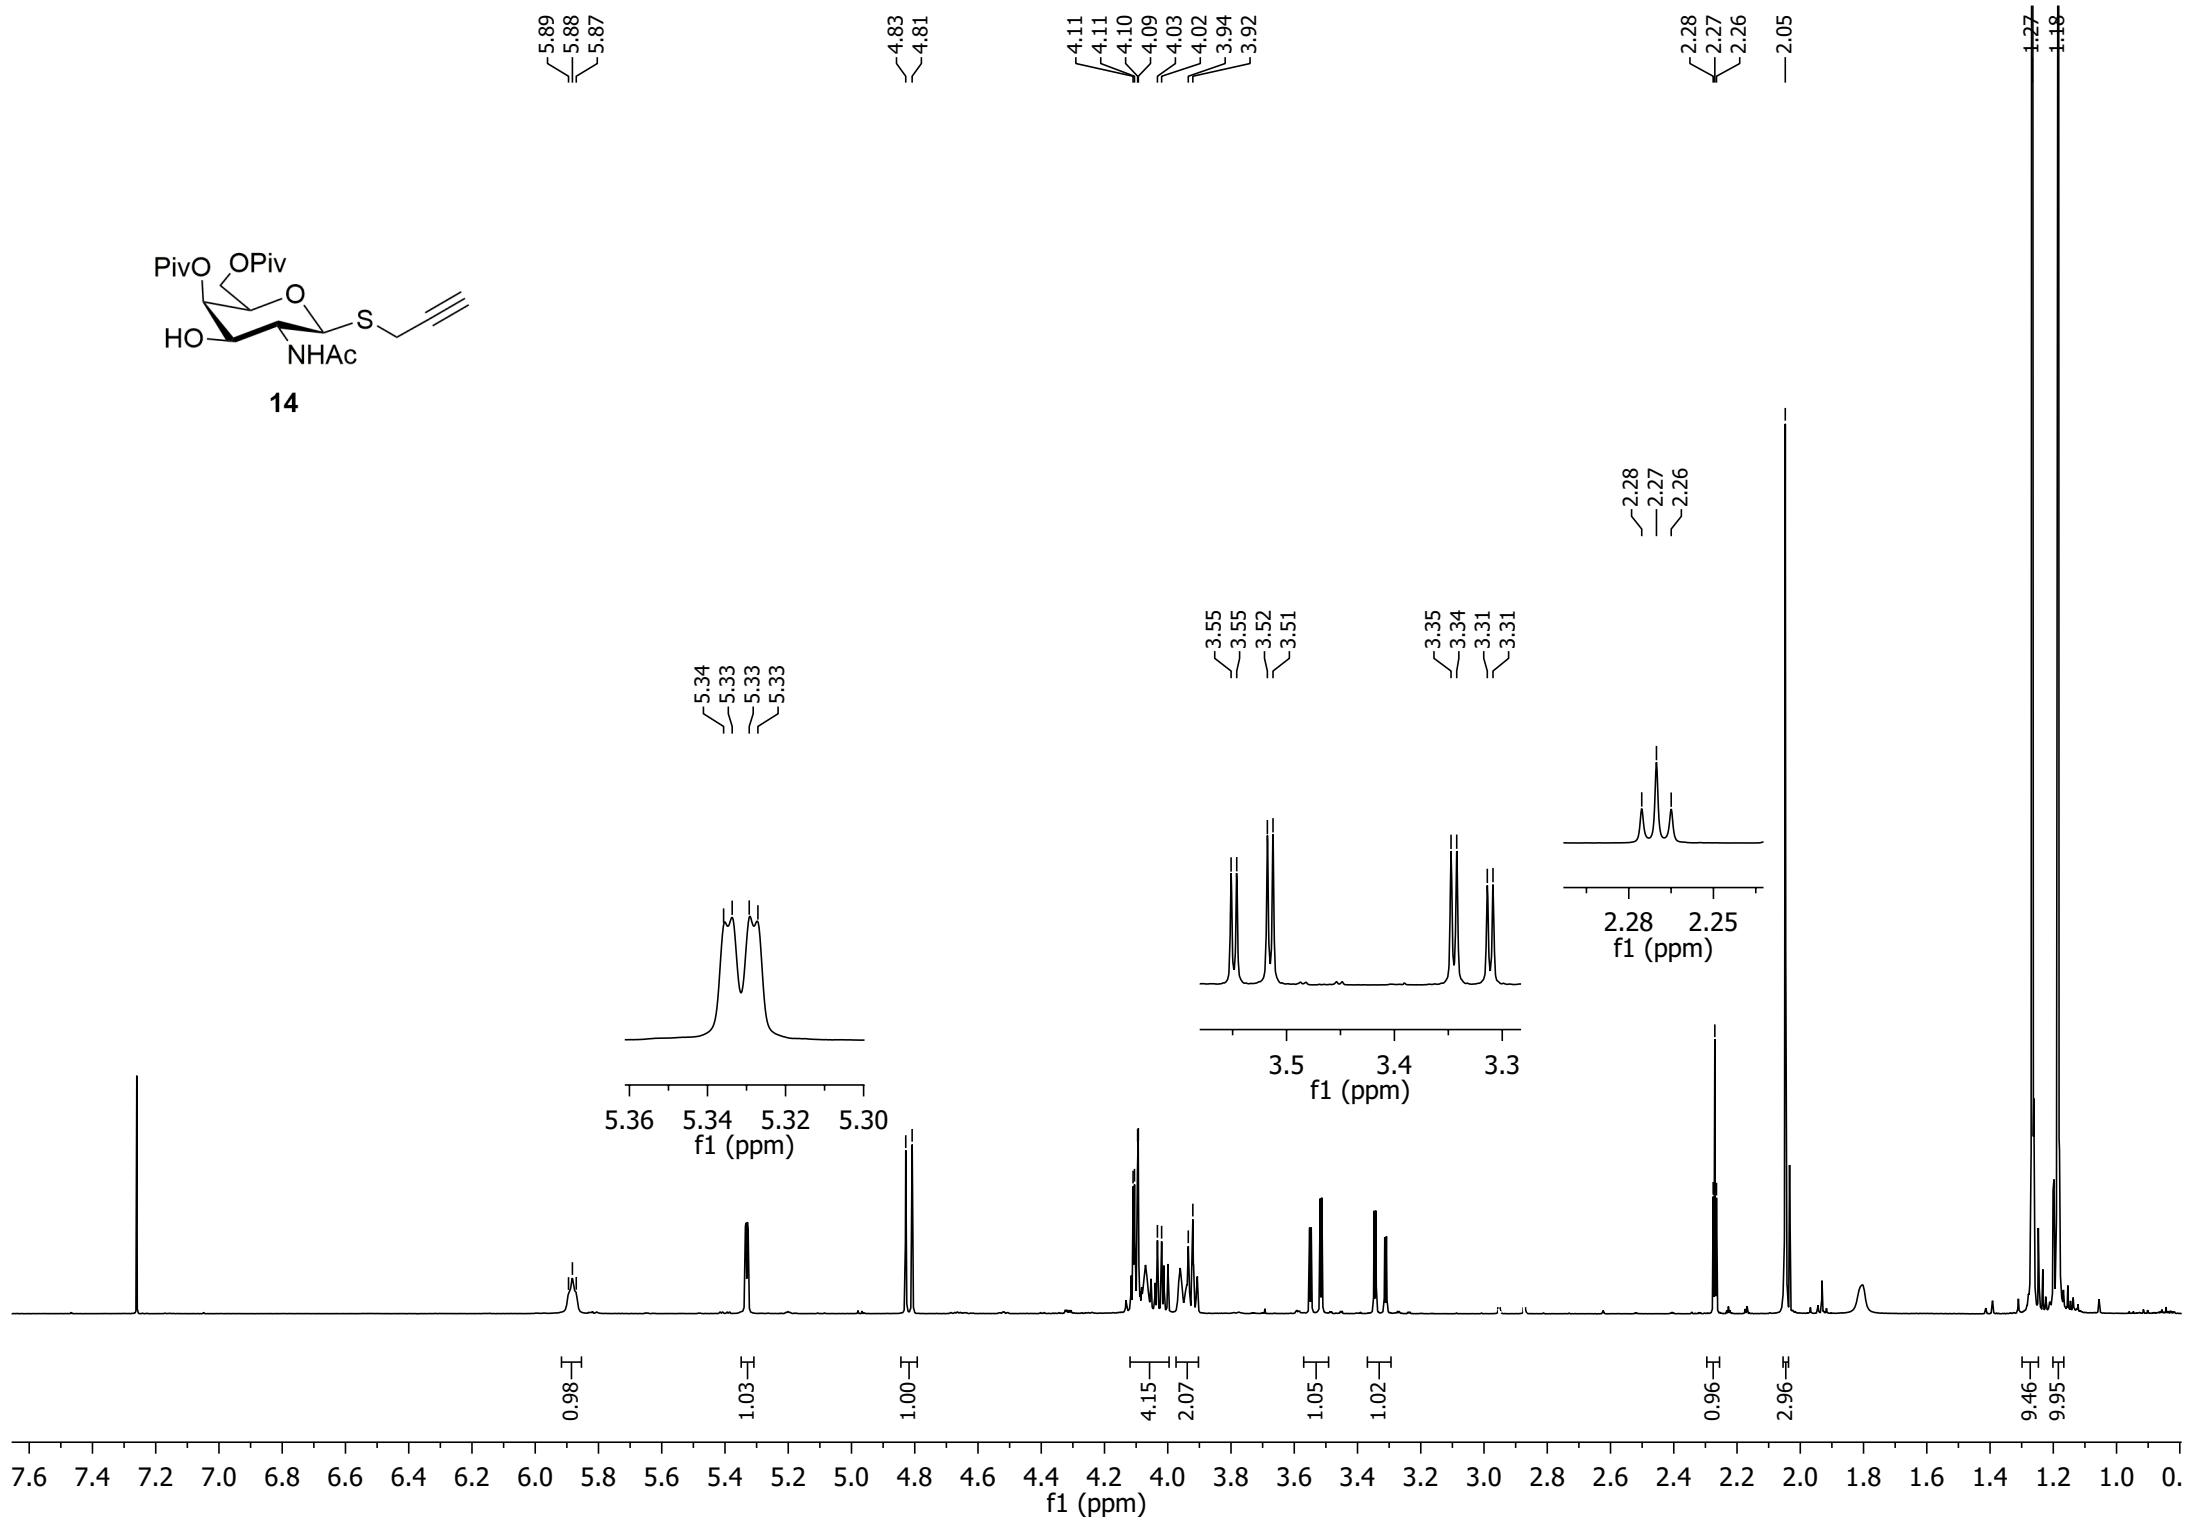

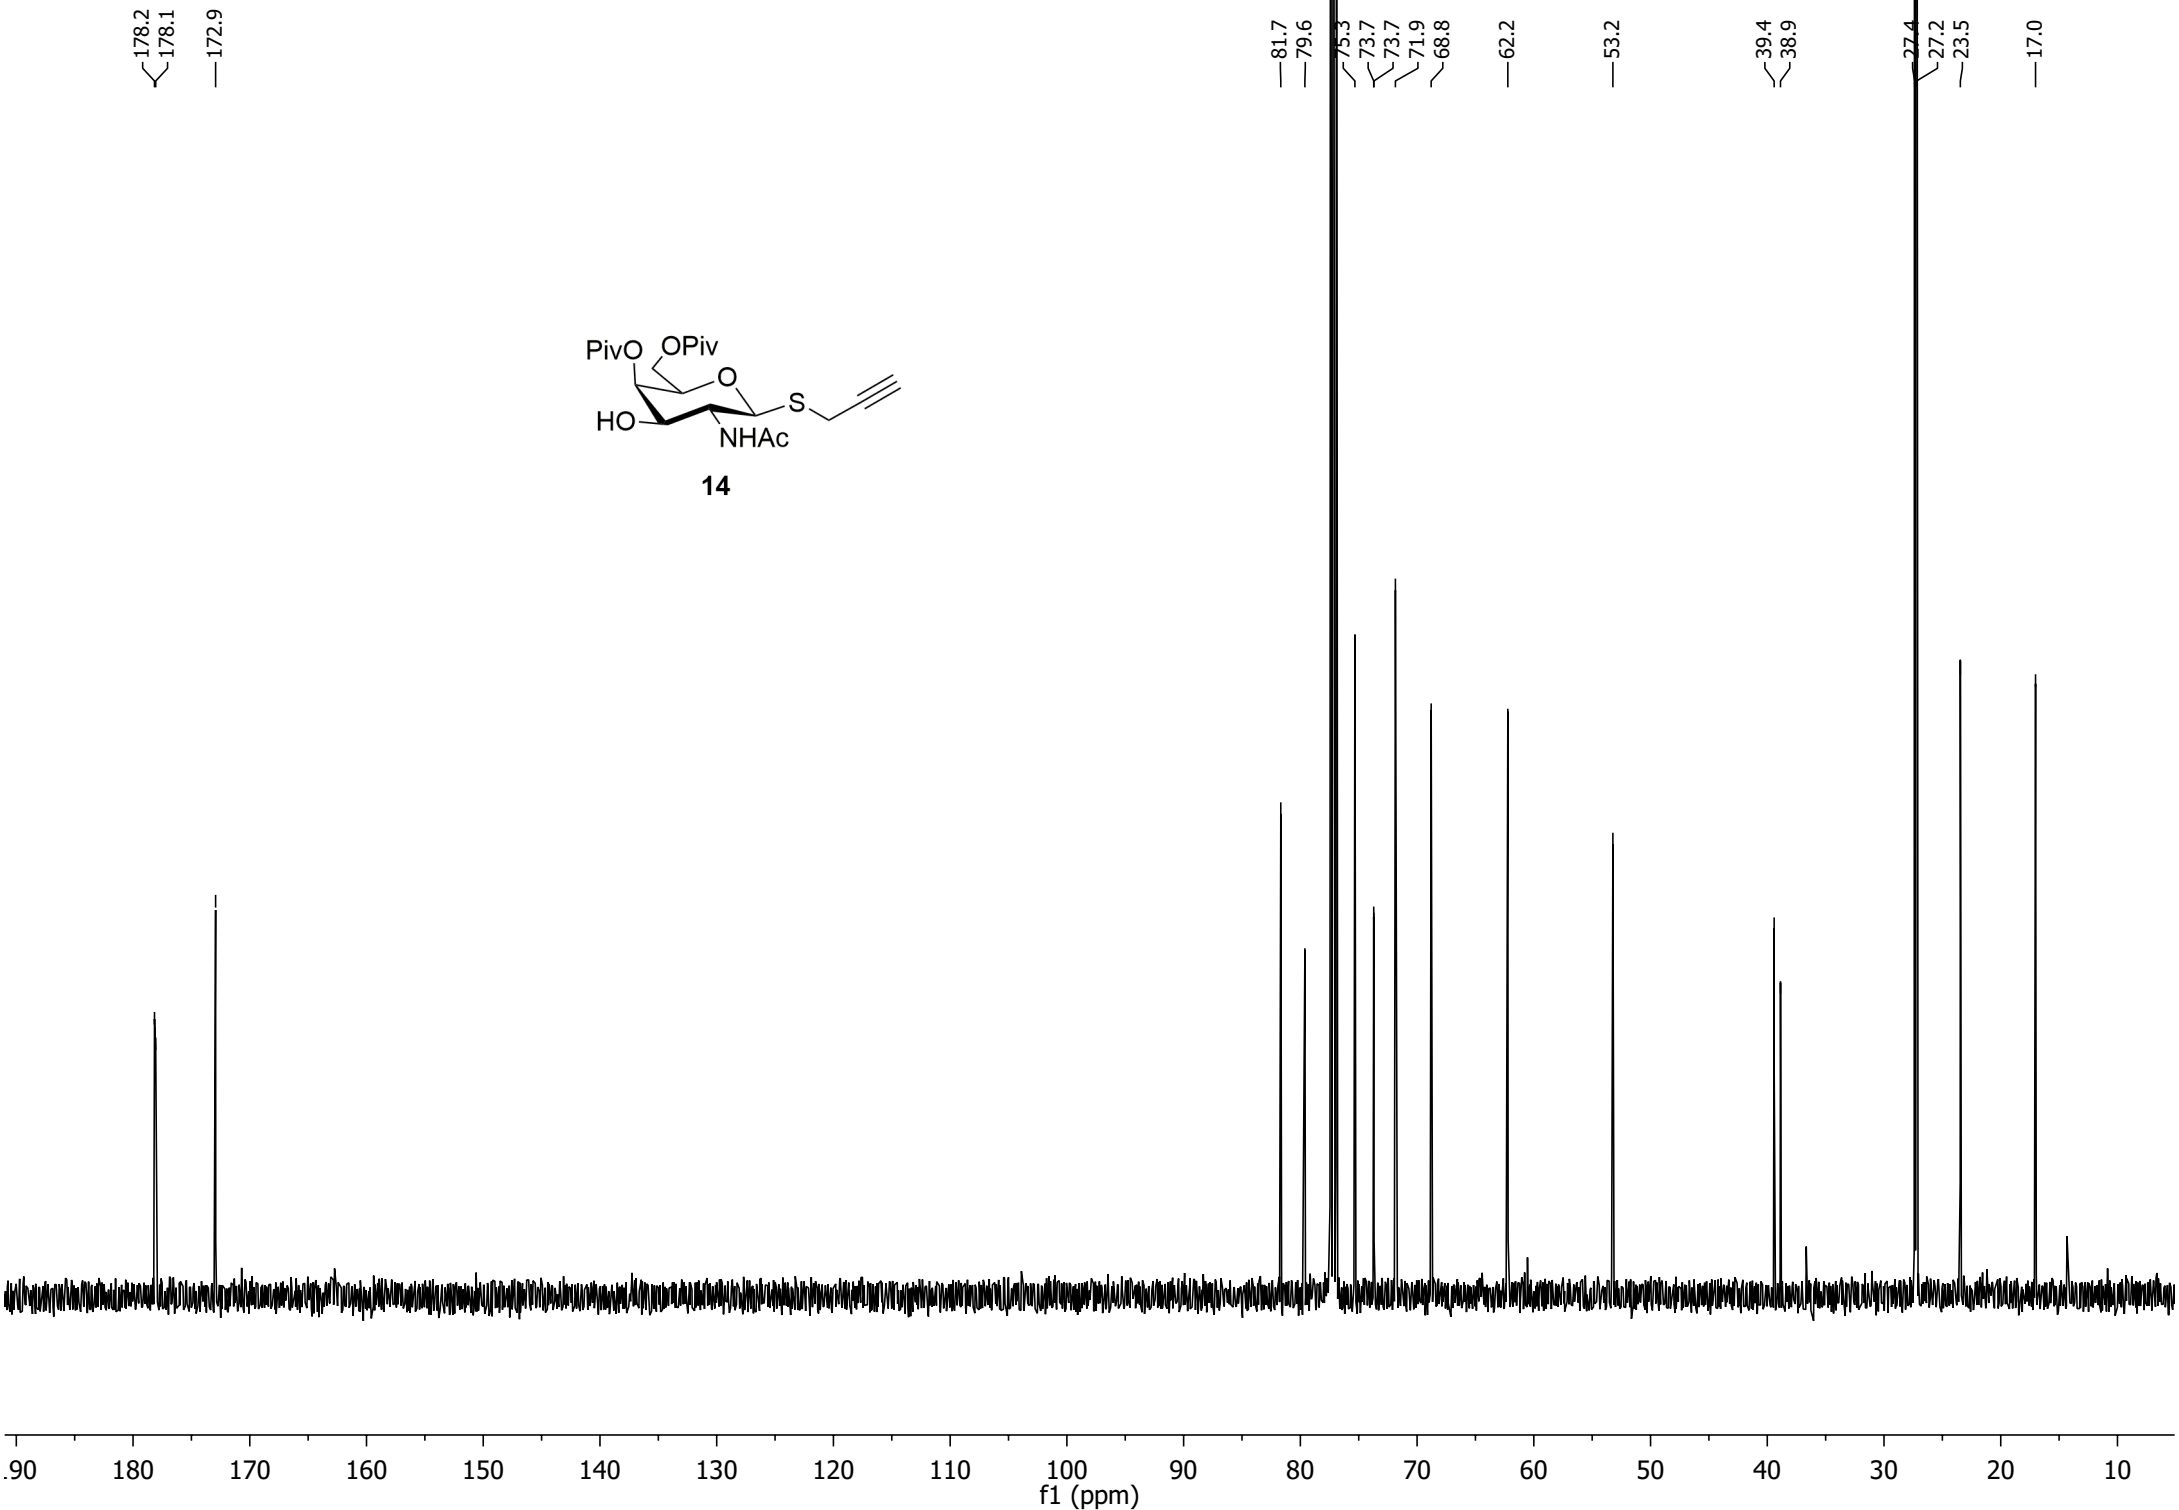



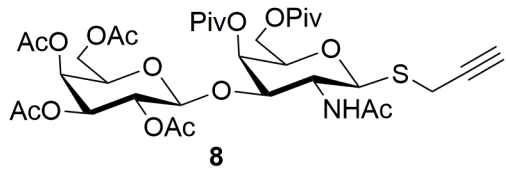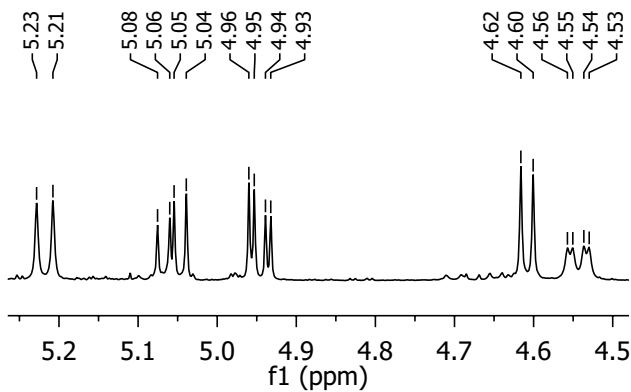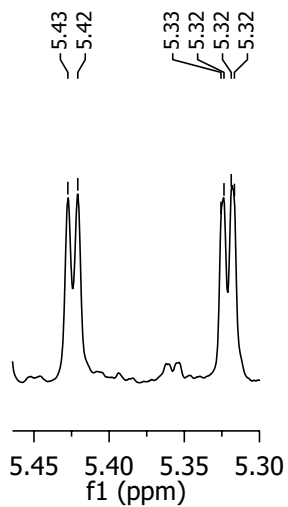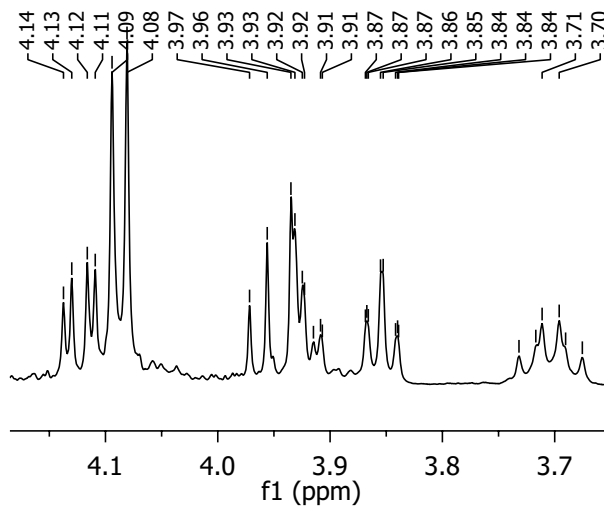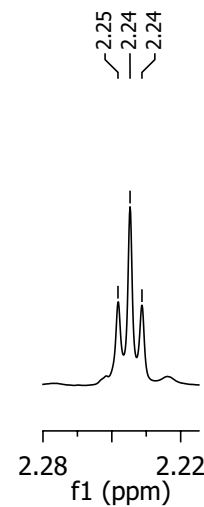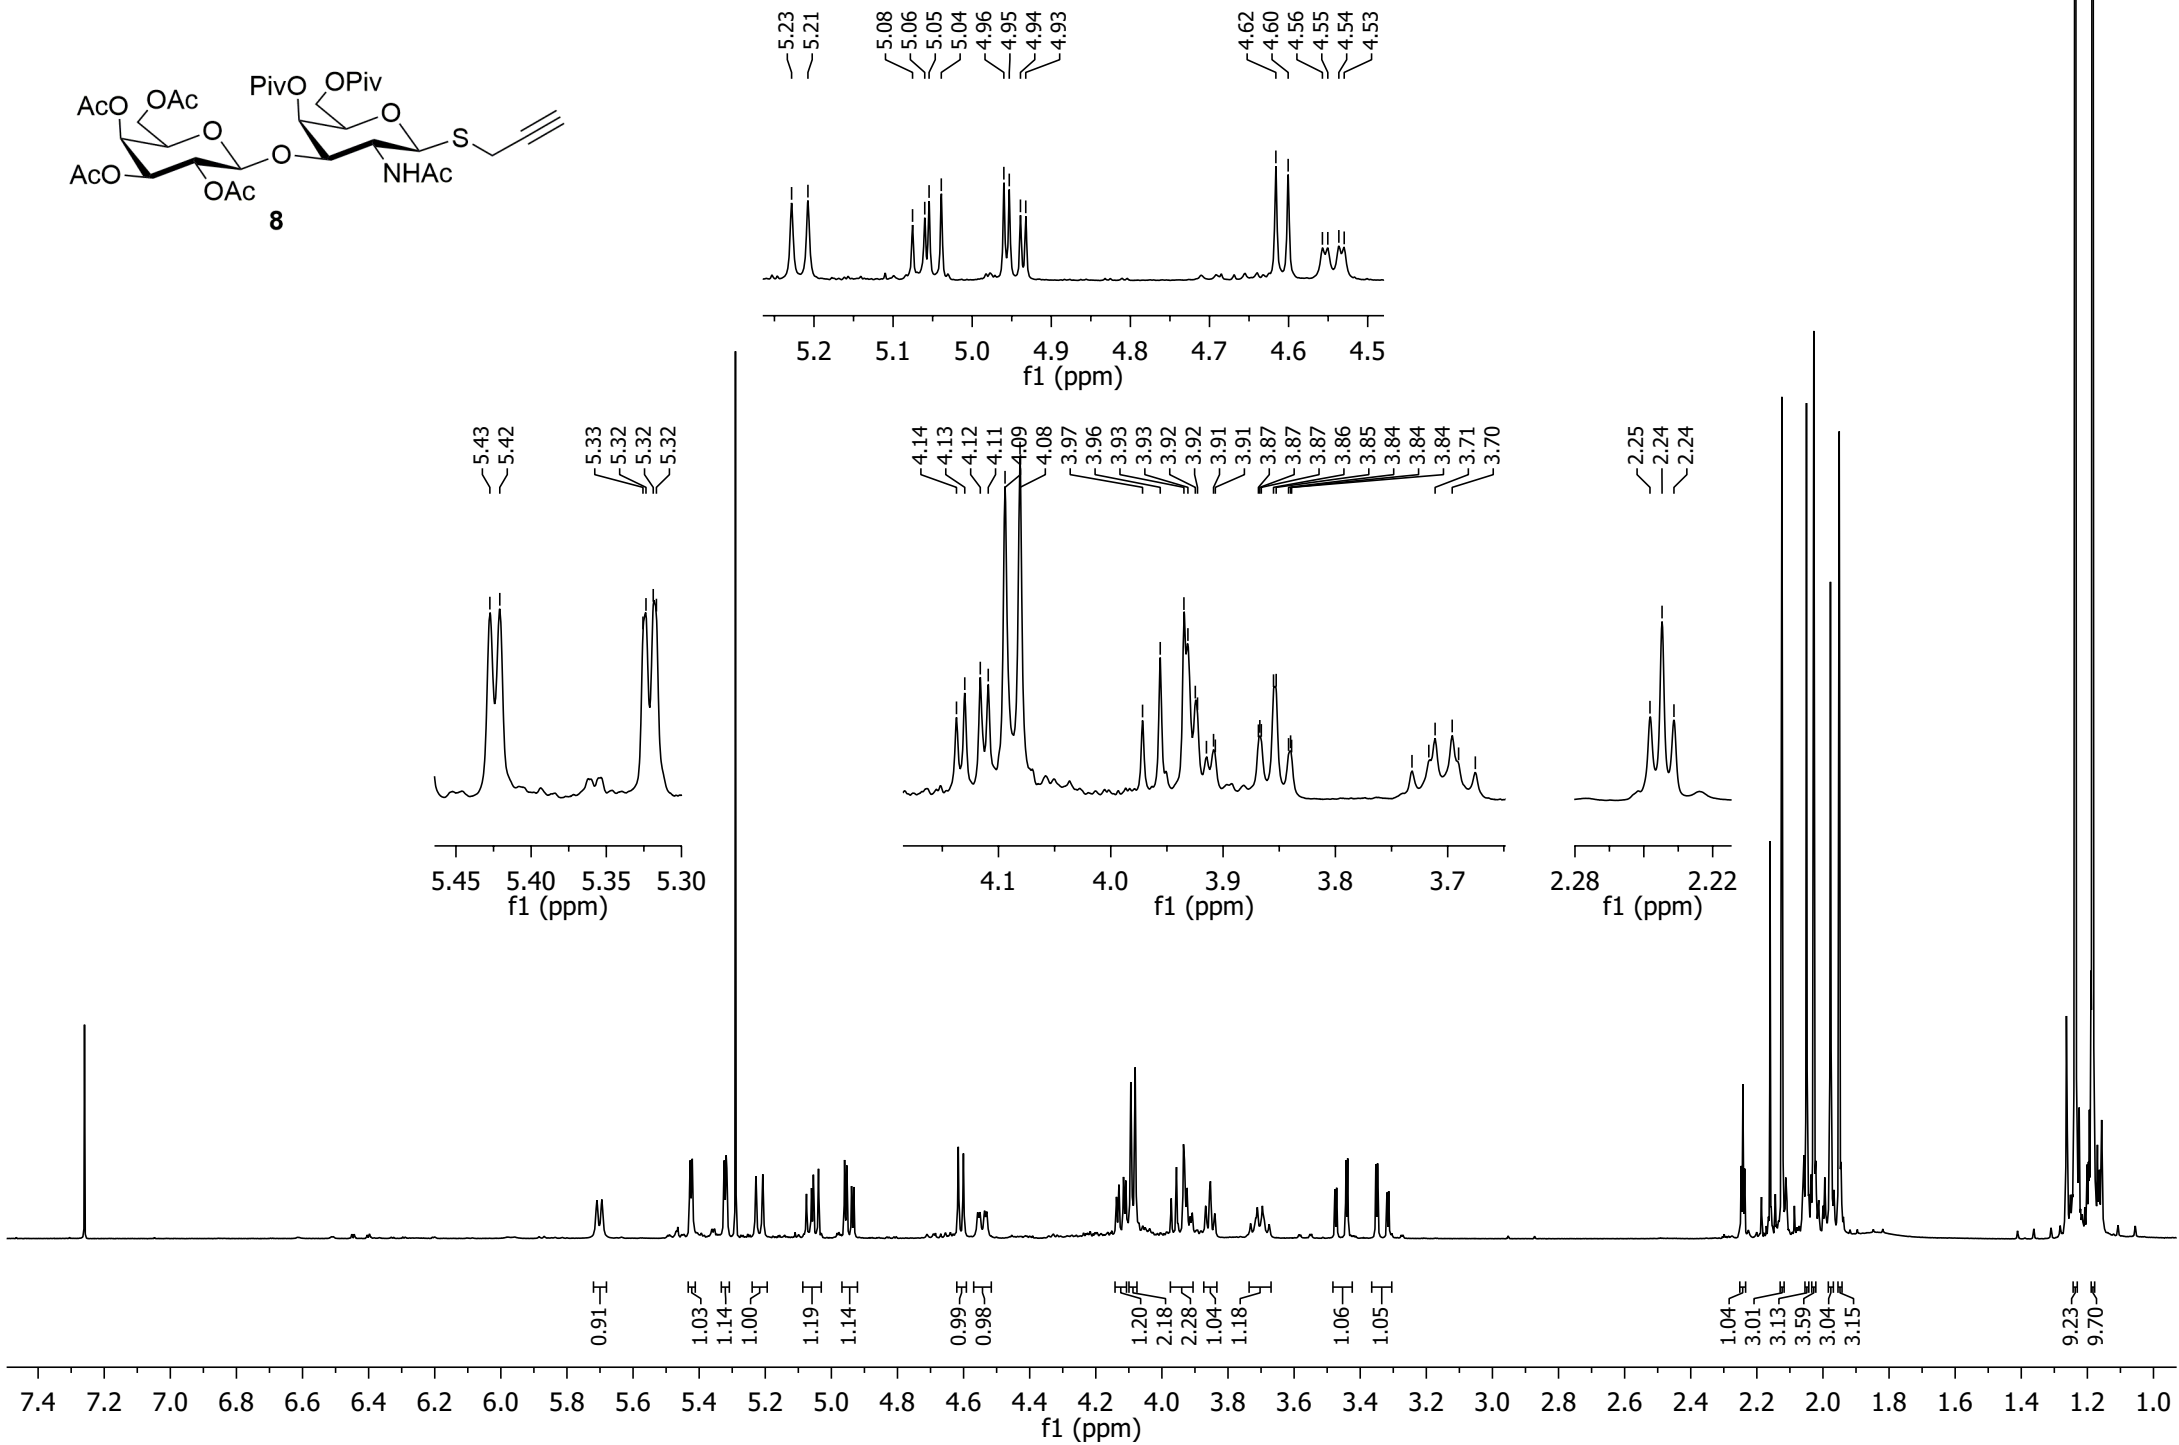

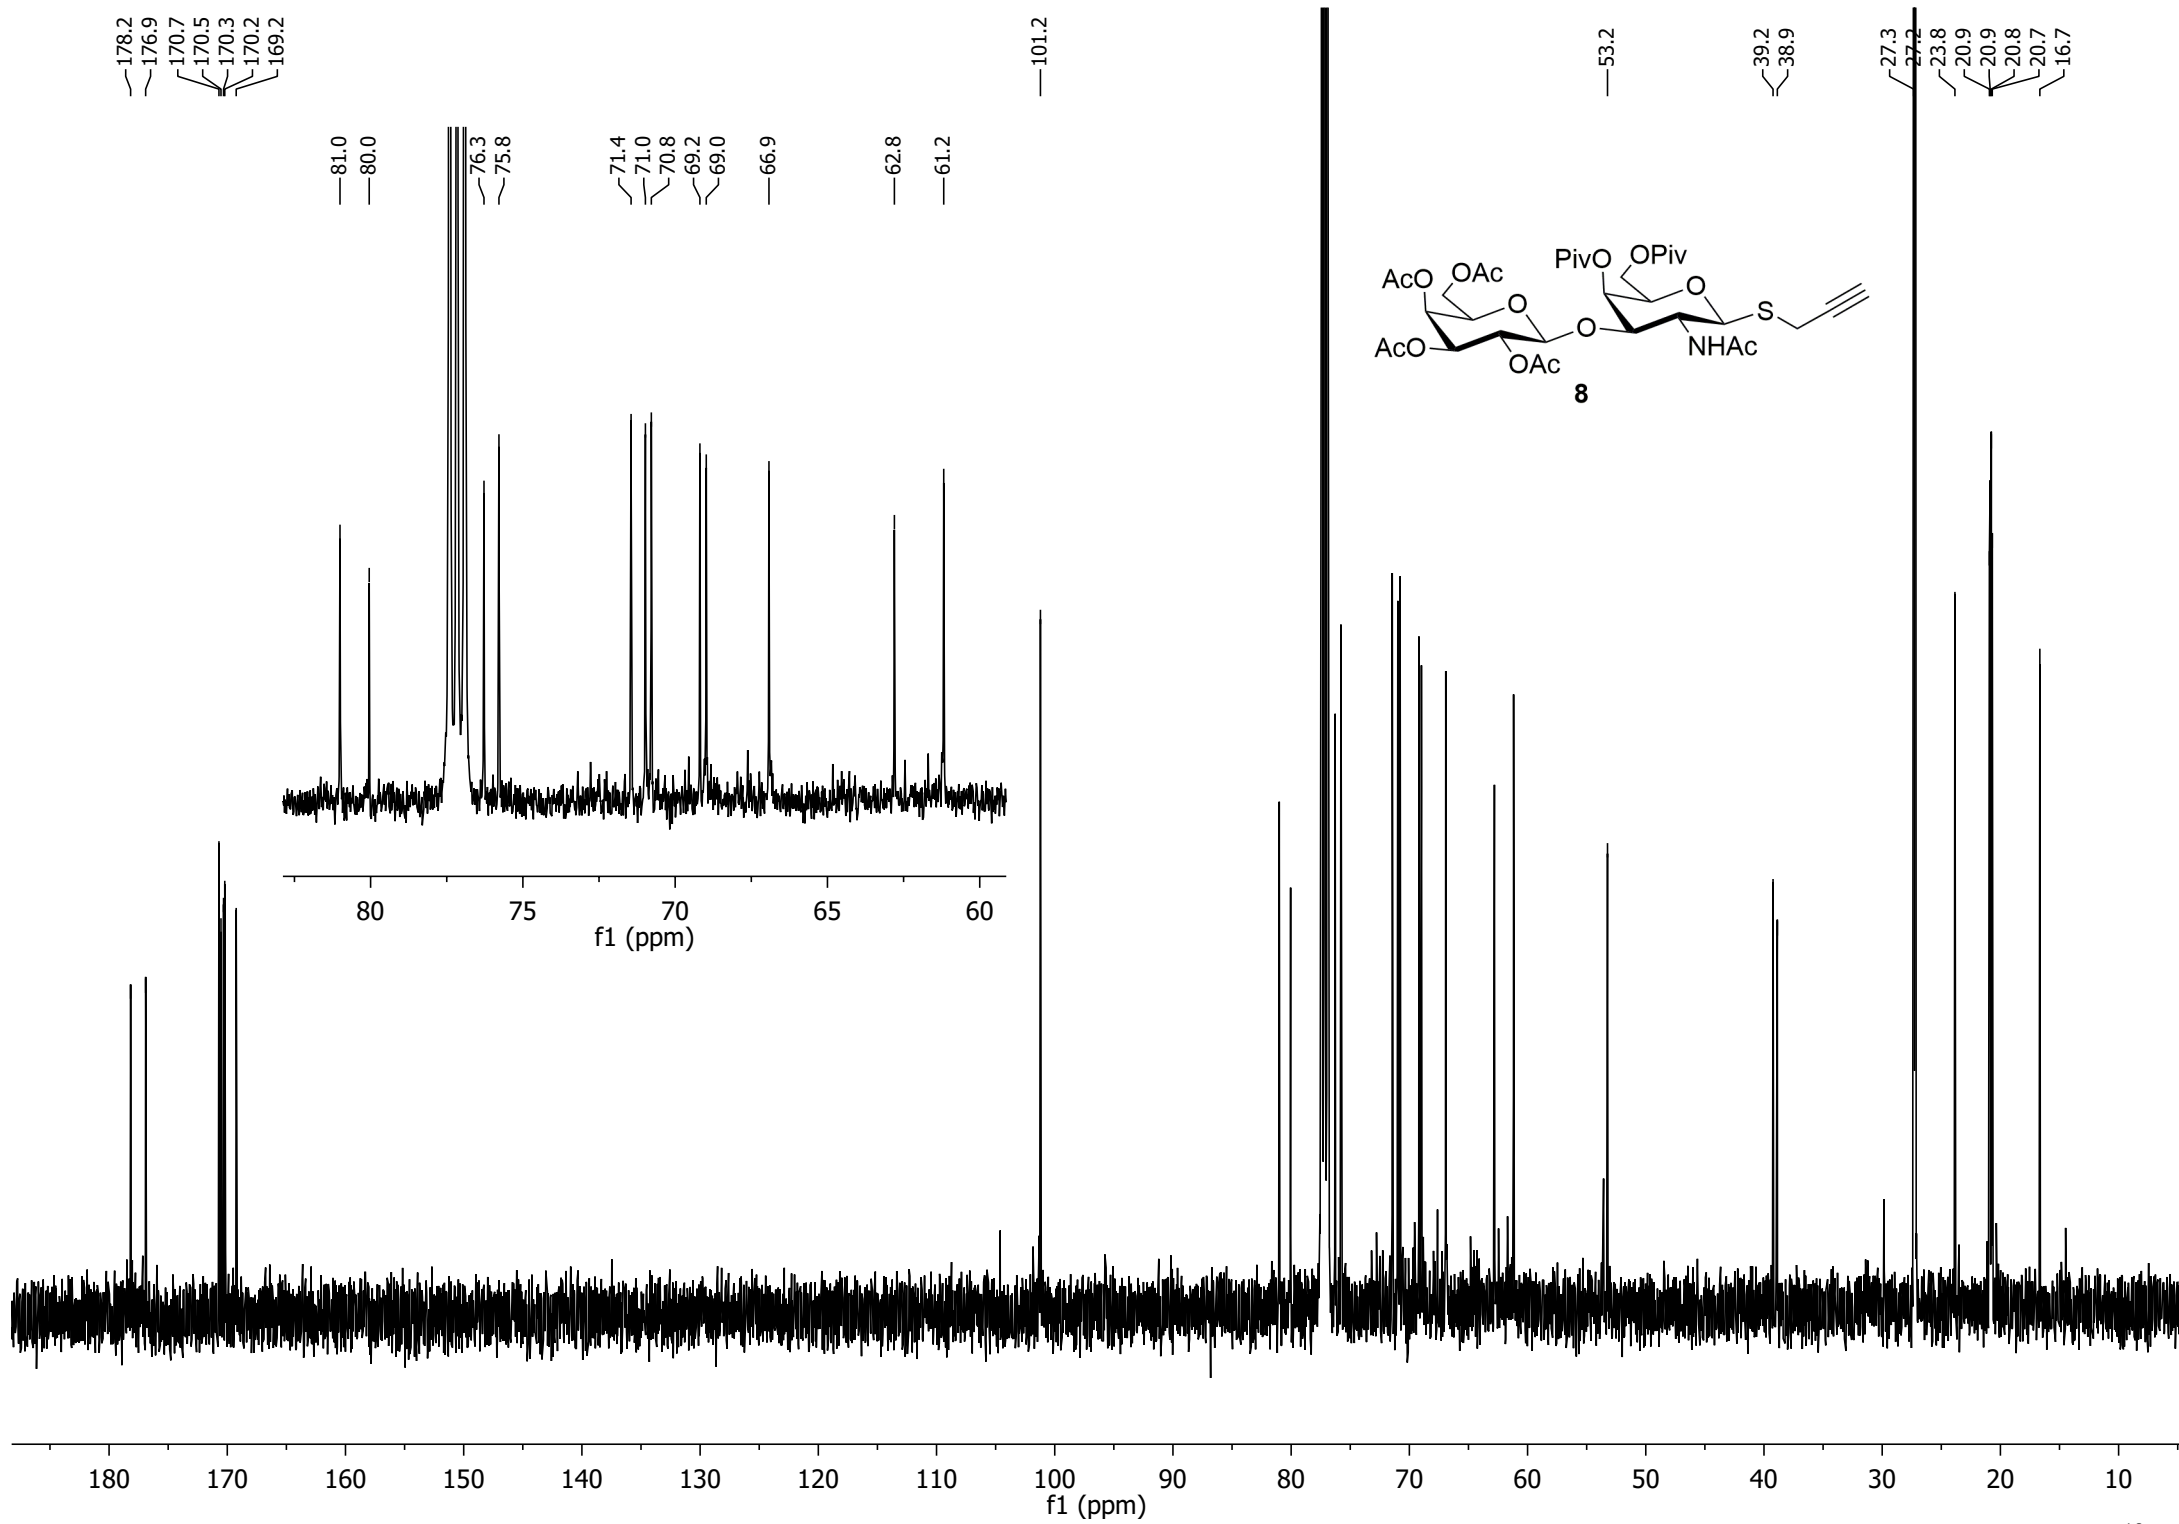

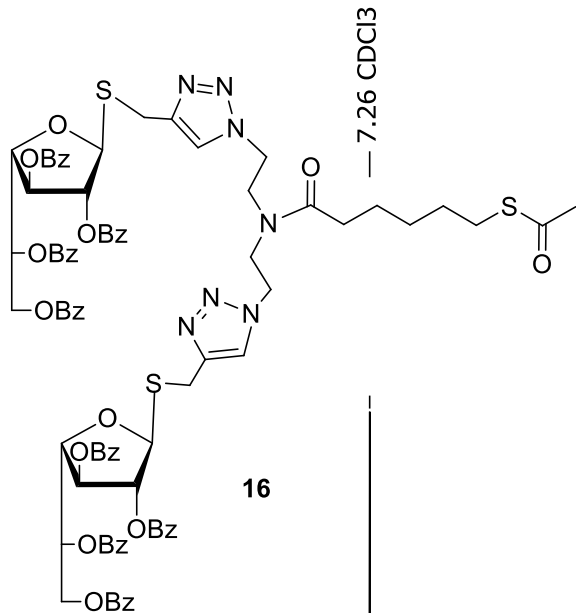

**16**

6.10  
 5.71  
 5.70  
 5.68  
 5.66  
 5.47  
 5.45

2.80  
 2.78  
 2.76  
 2.26

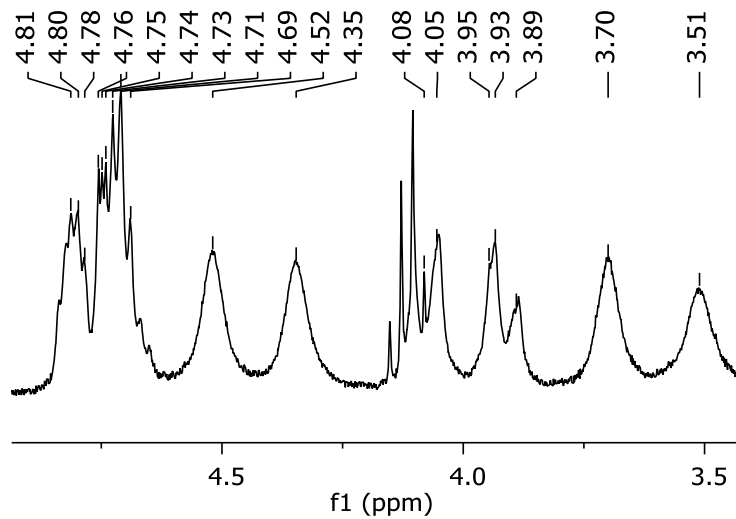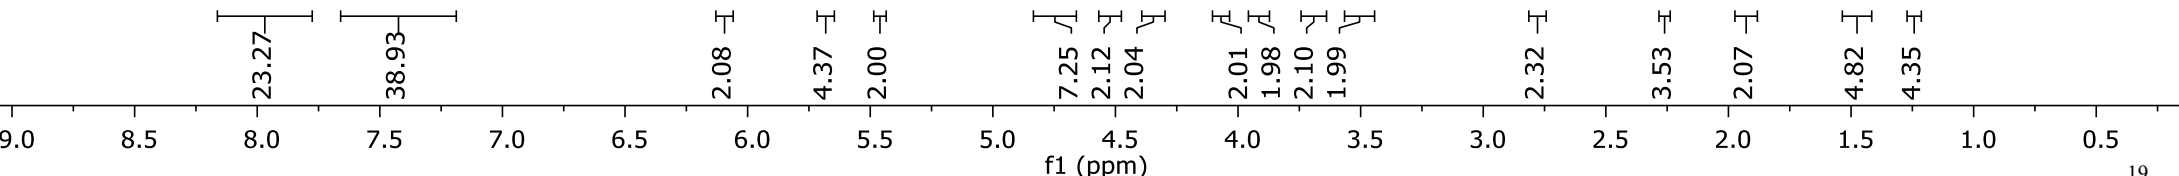

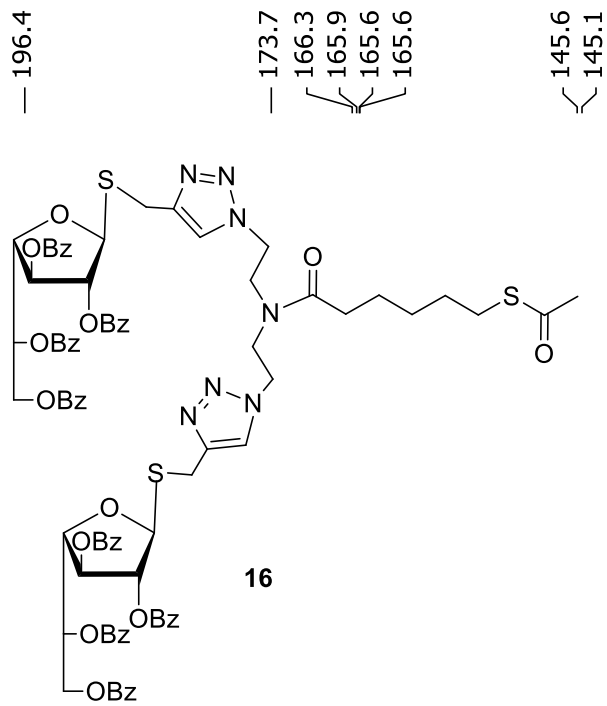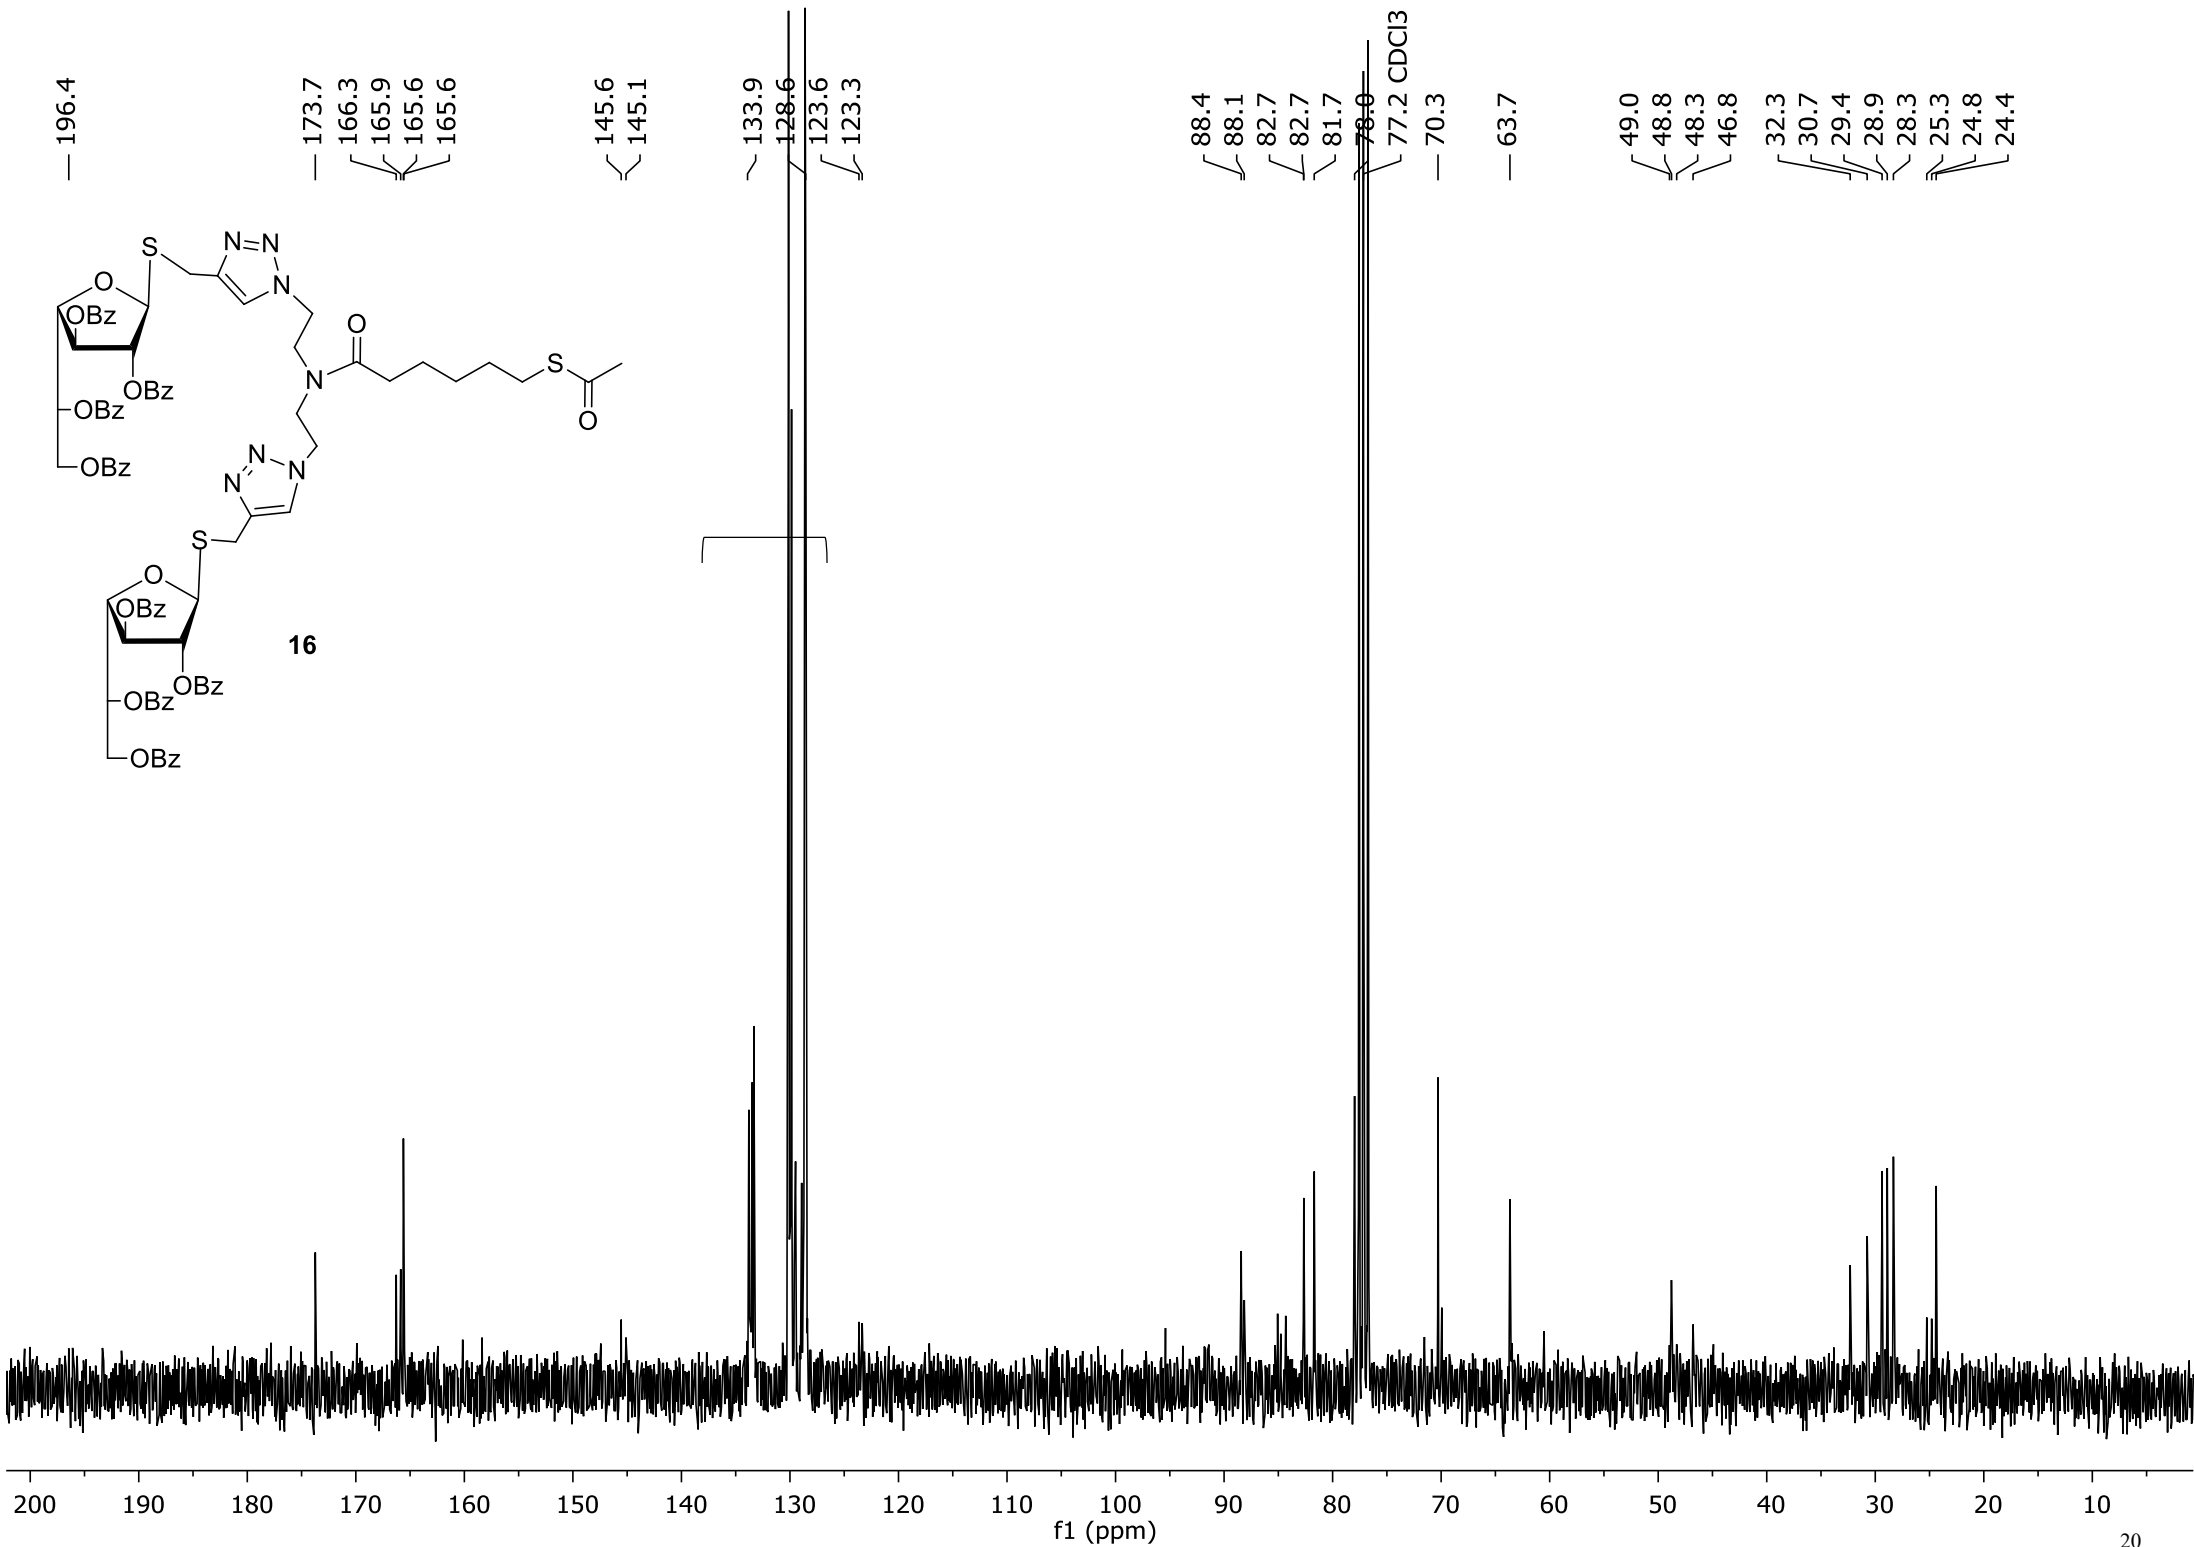

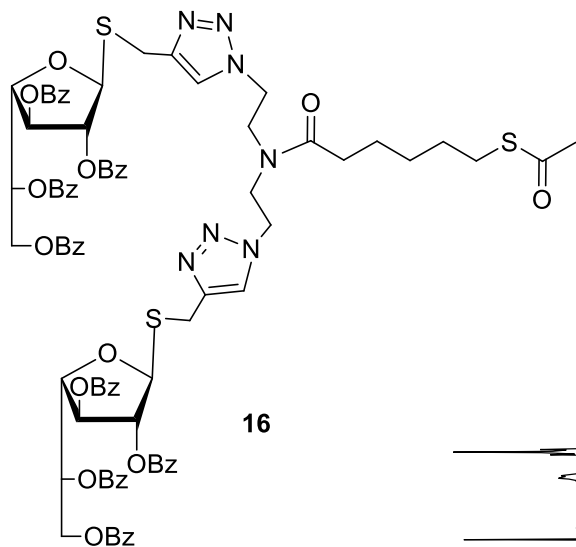

16

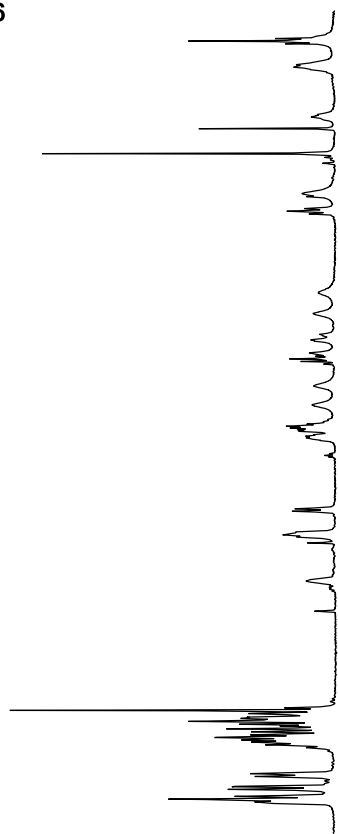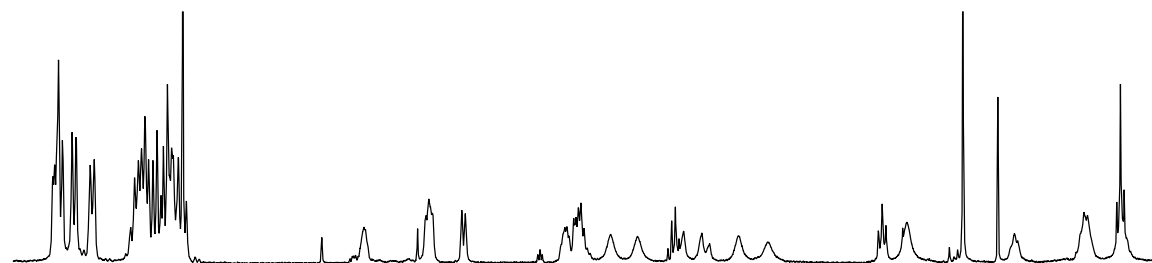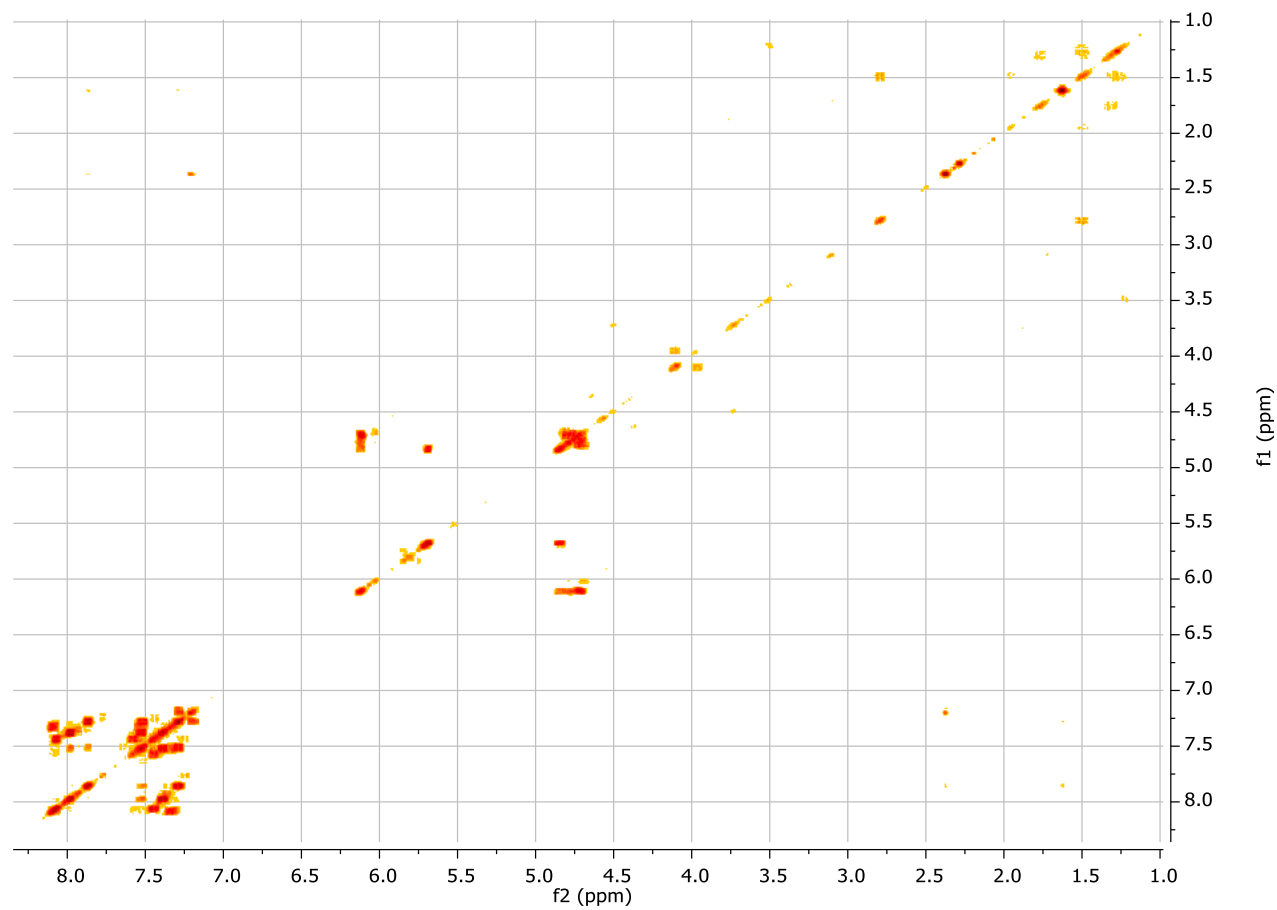

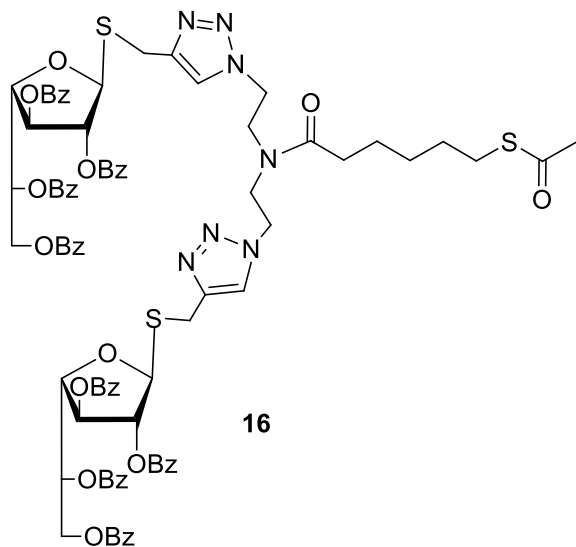

16

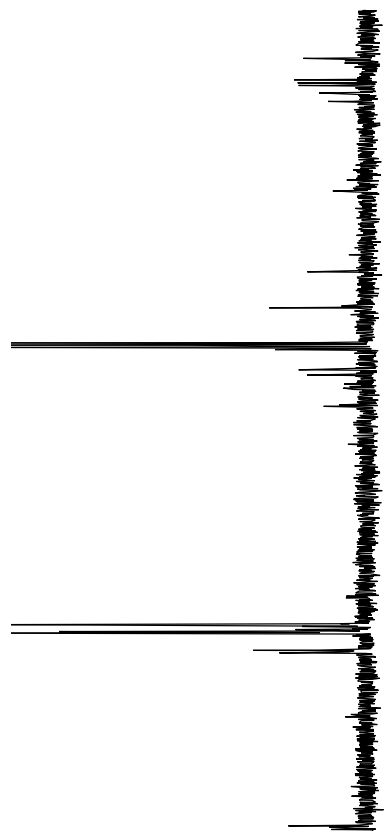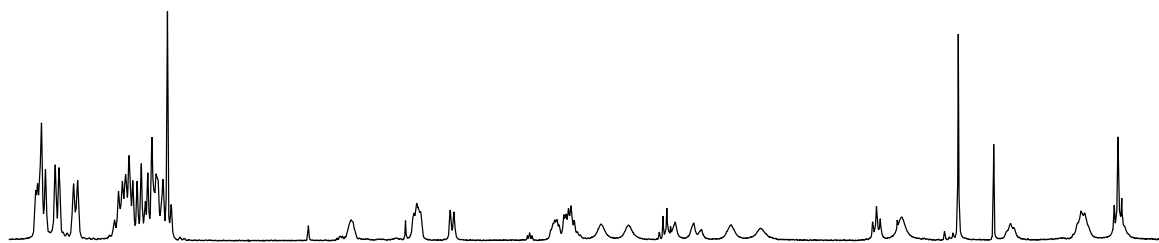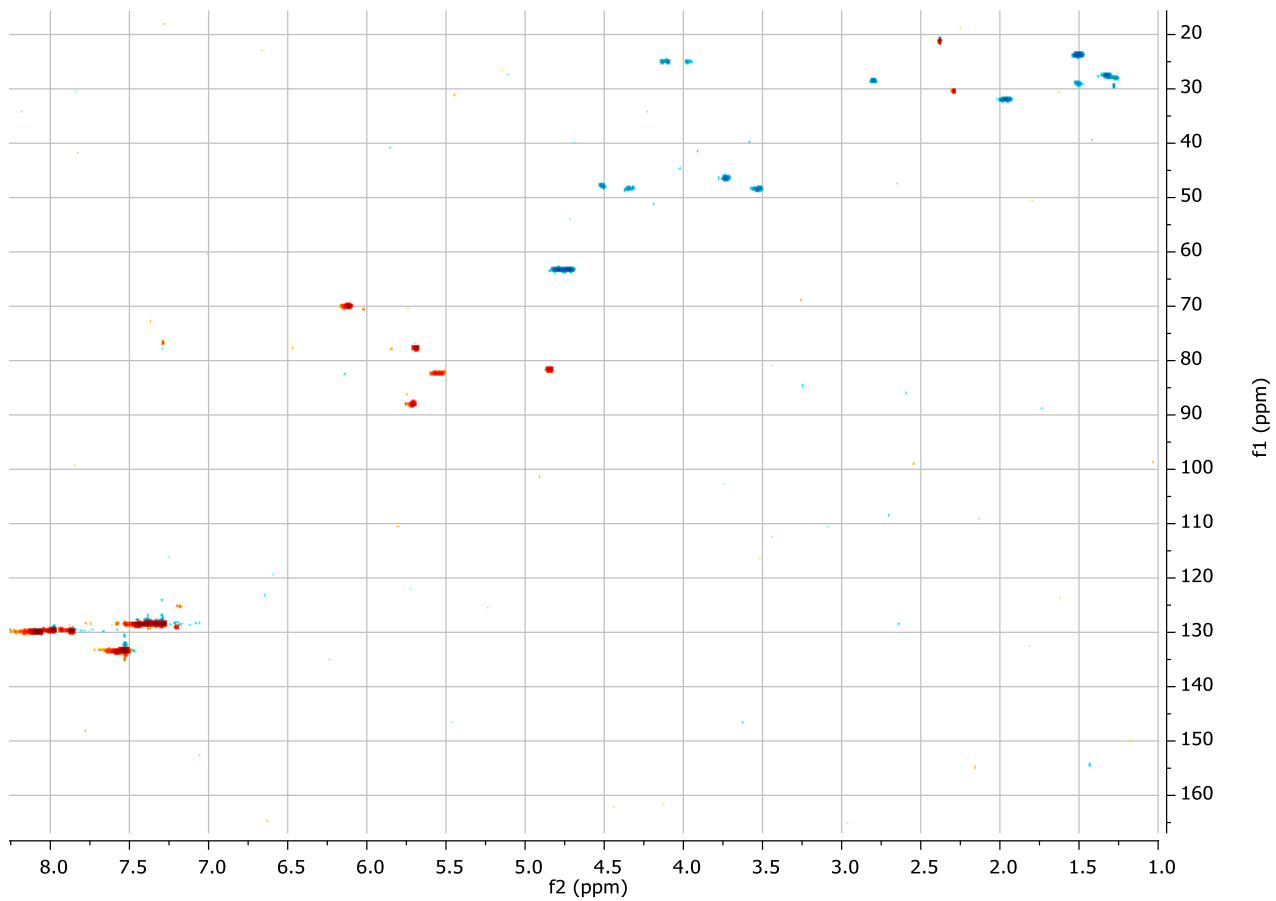

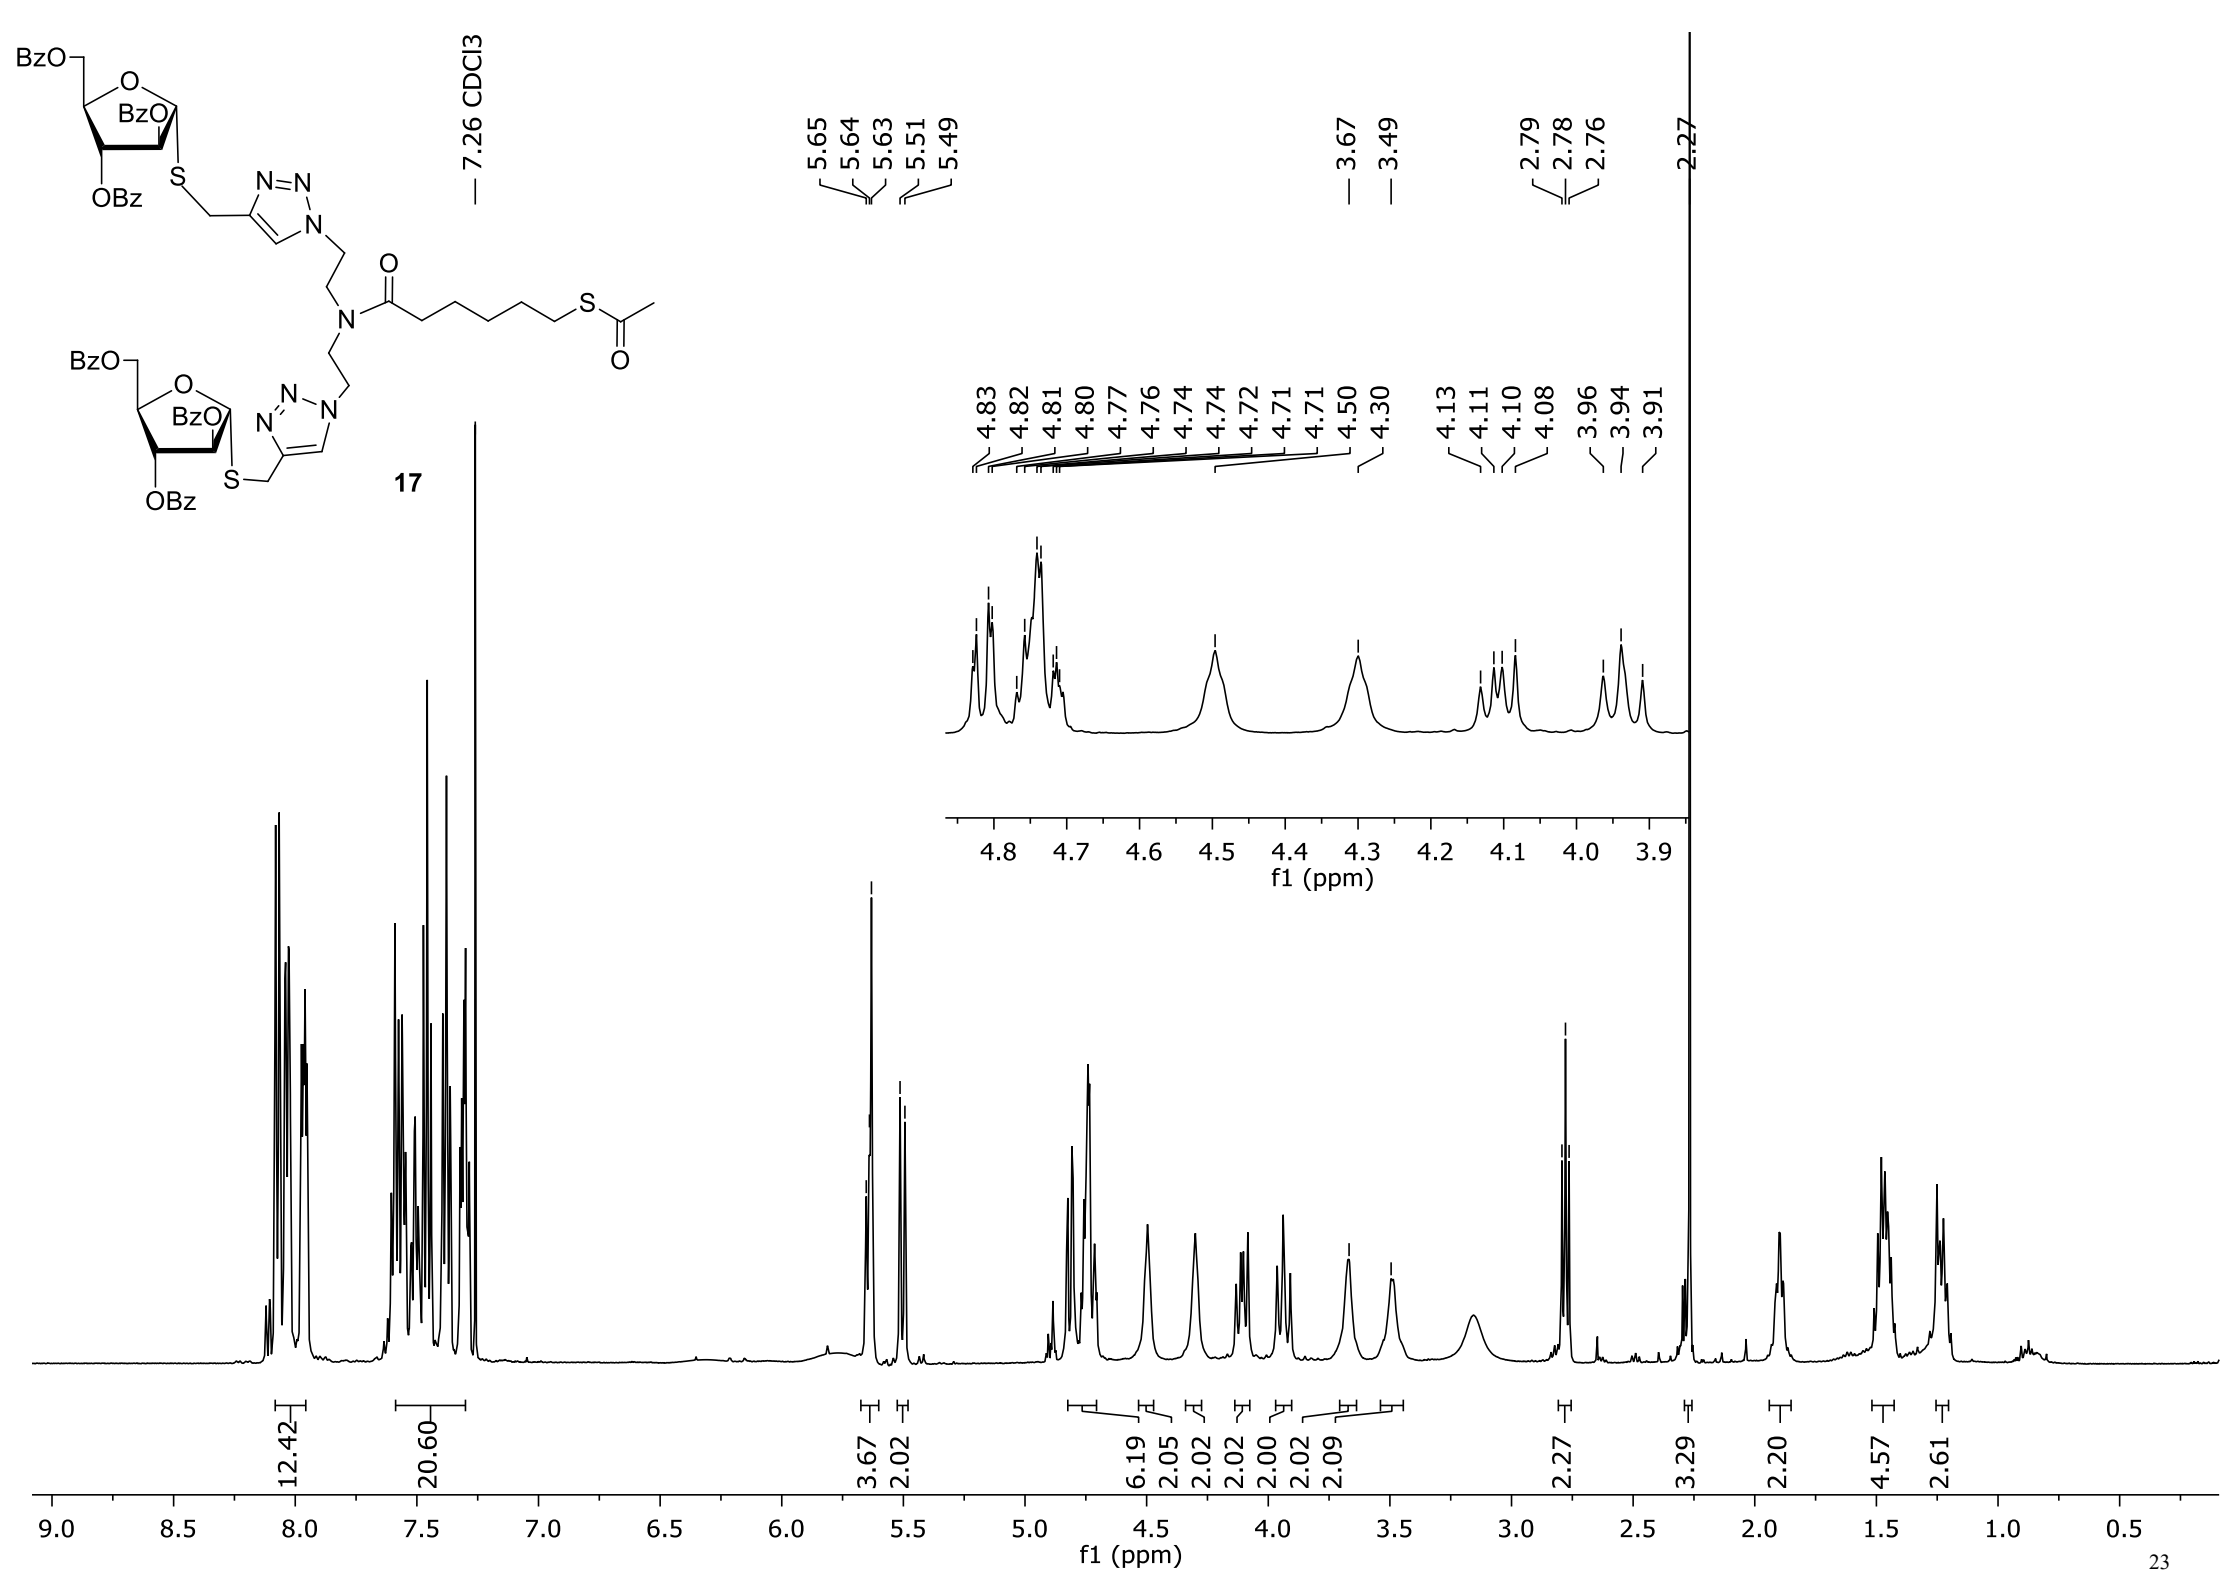

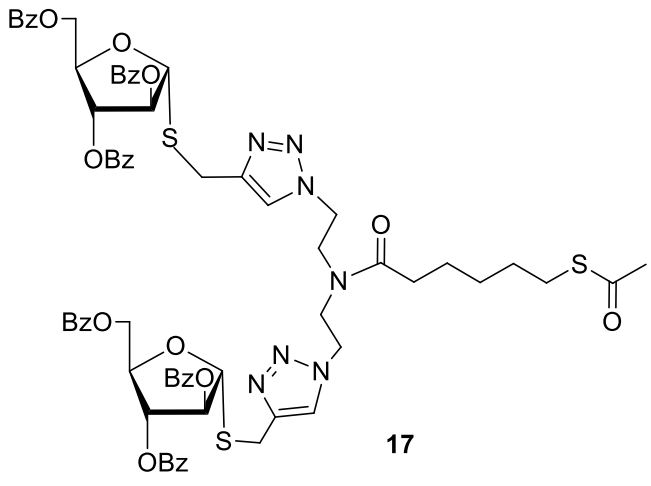

17

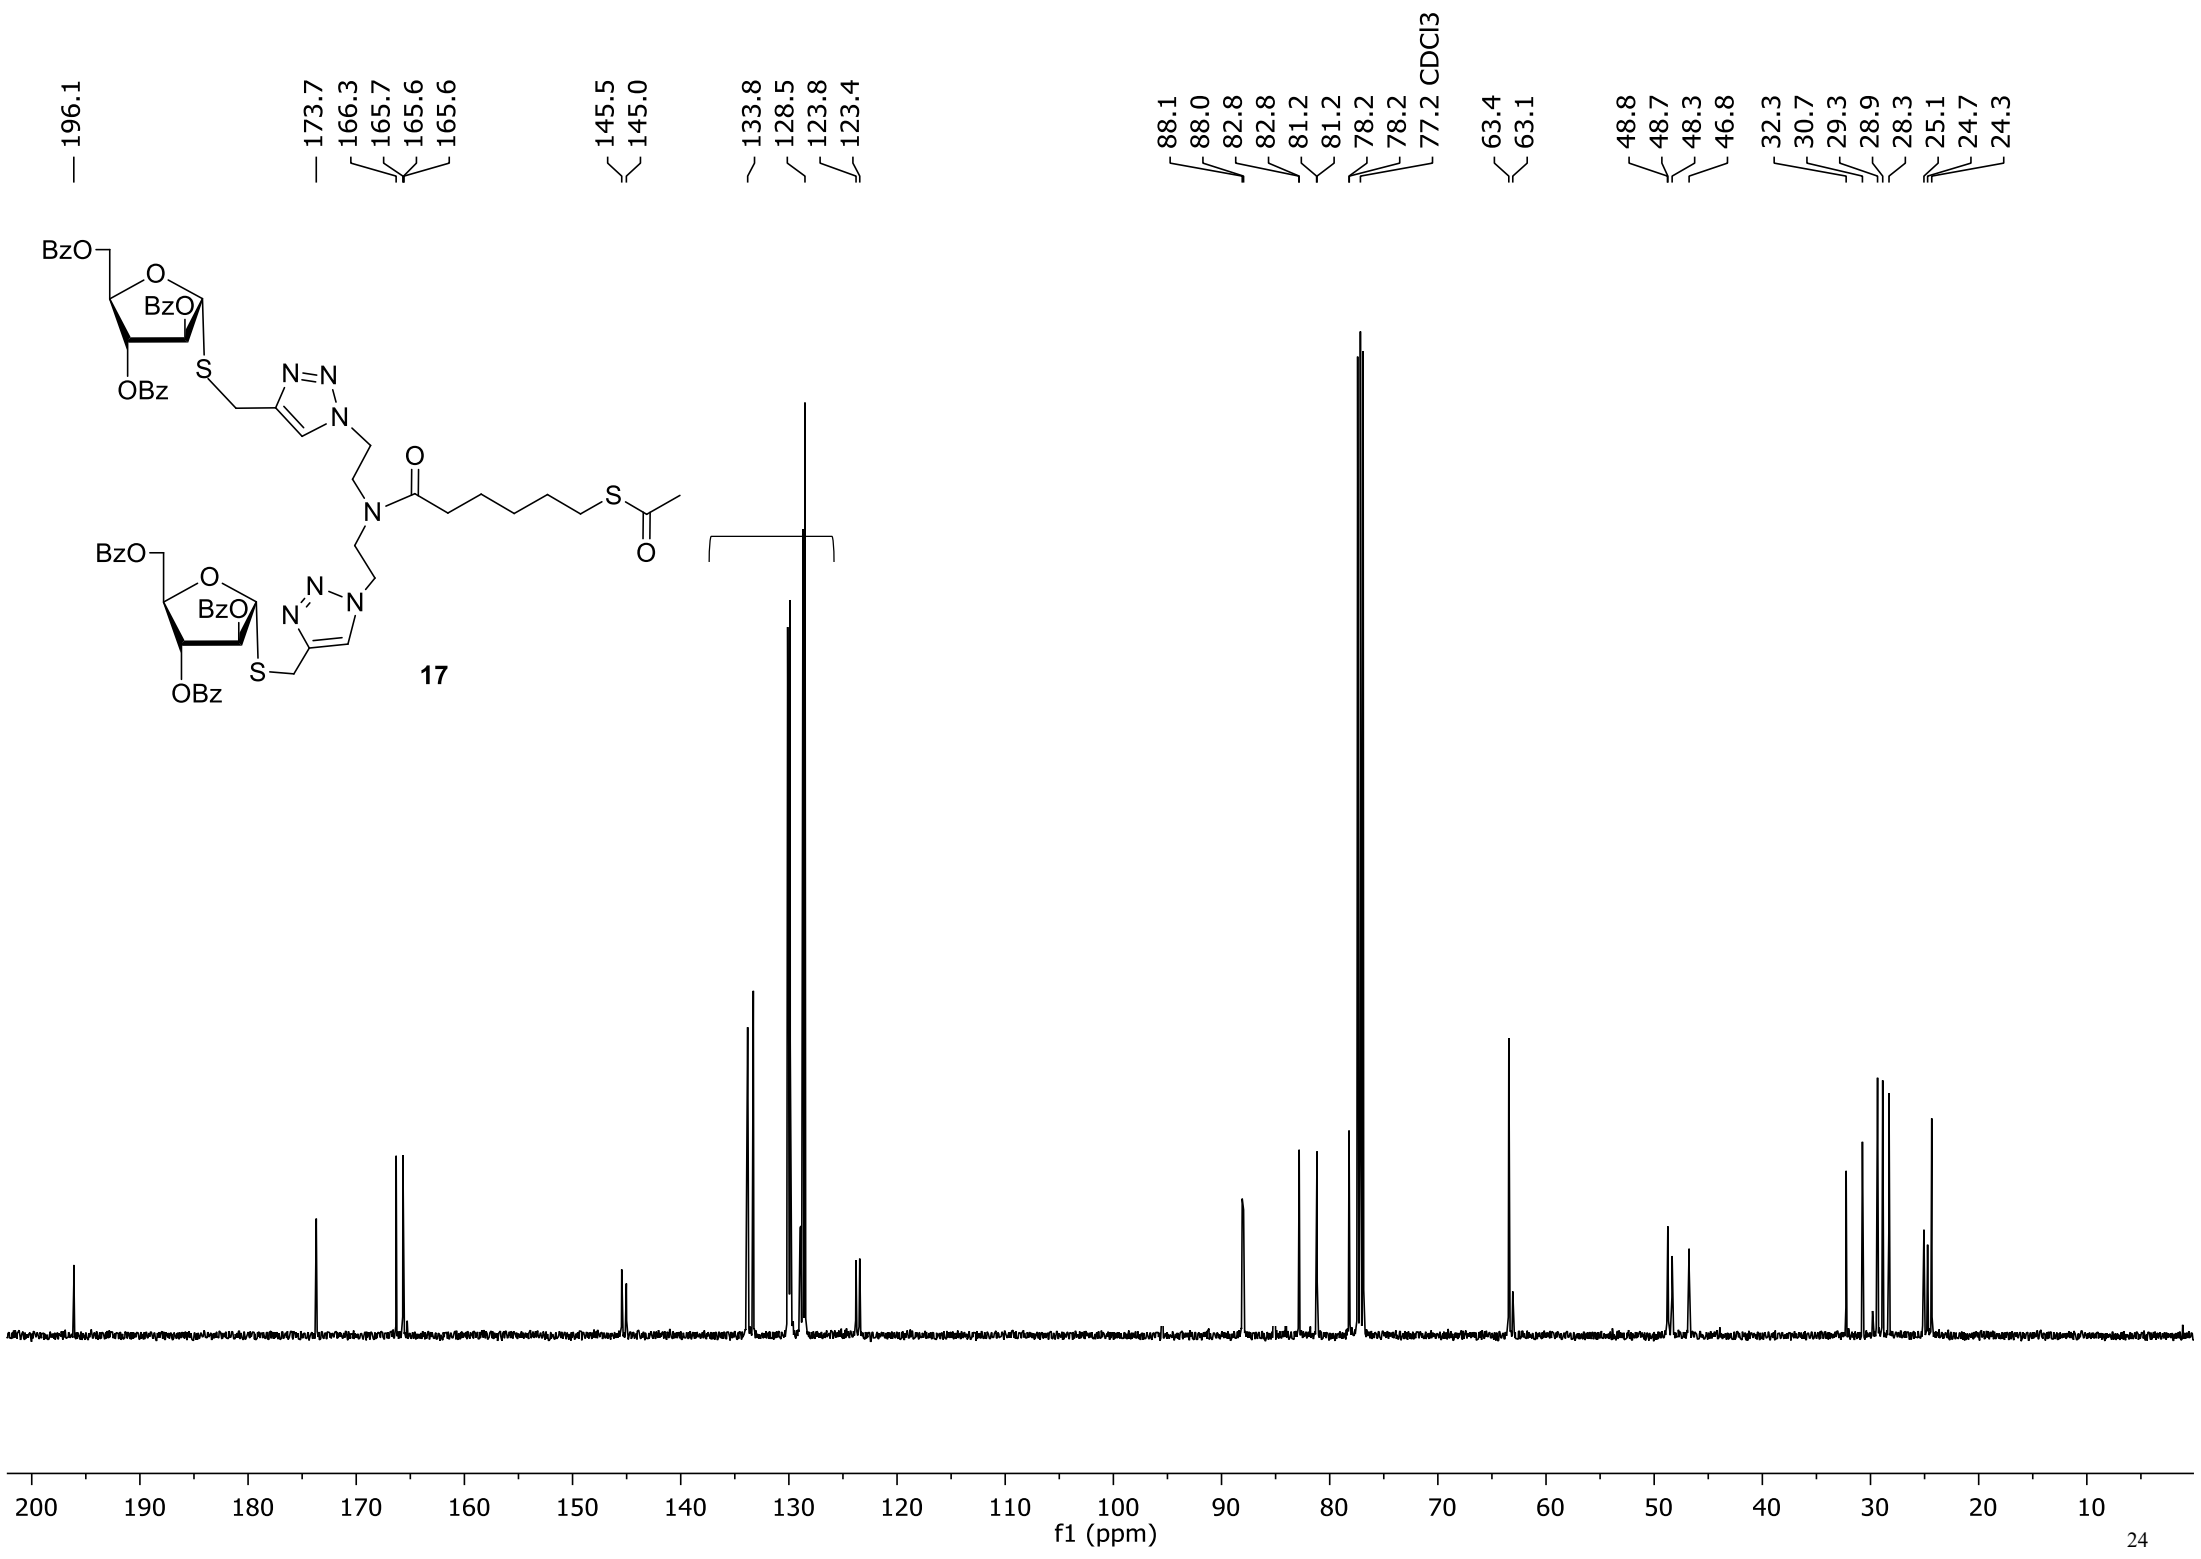



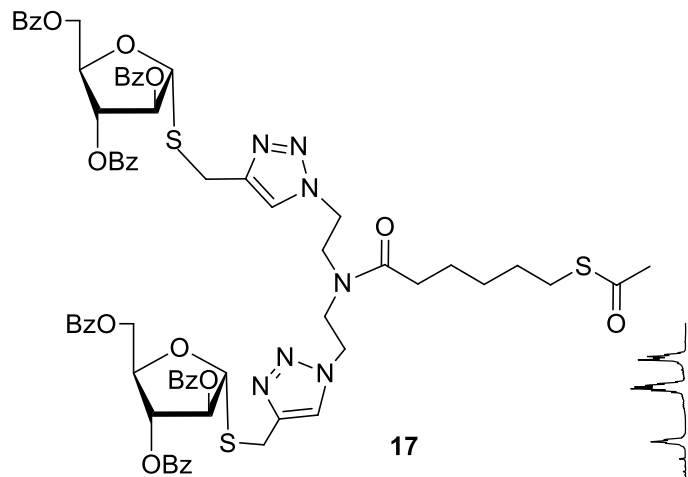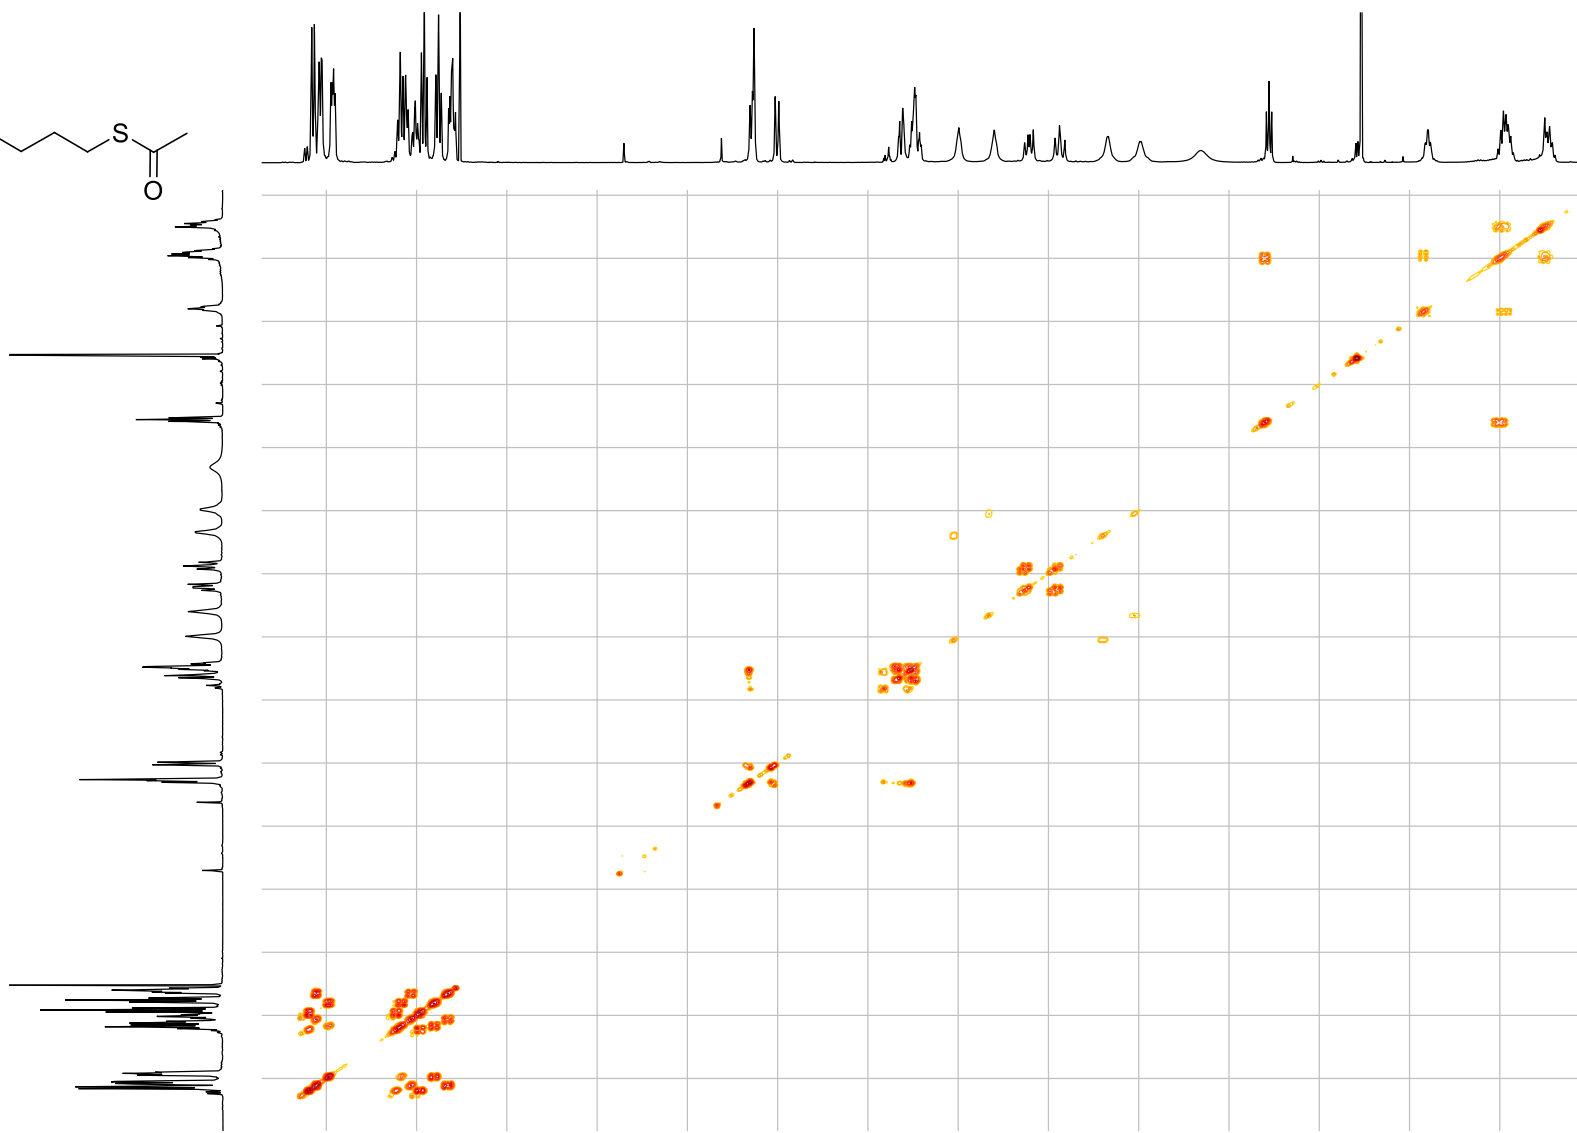

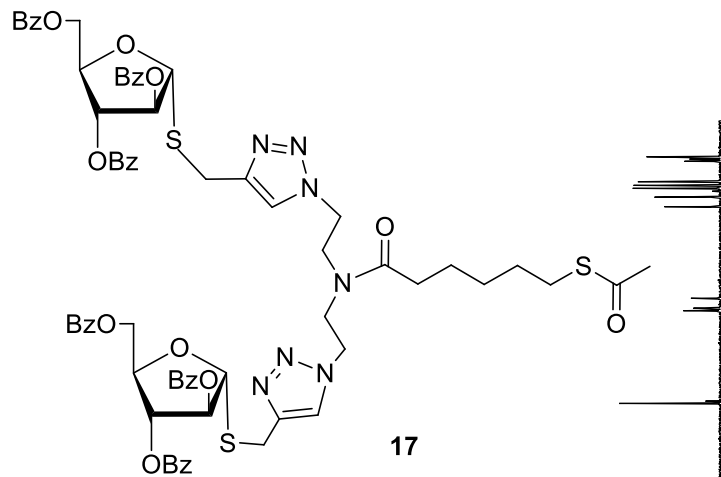

17

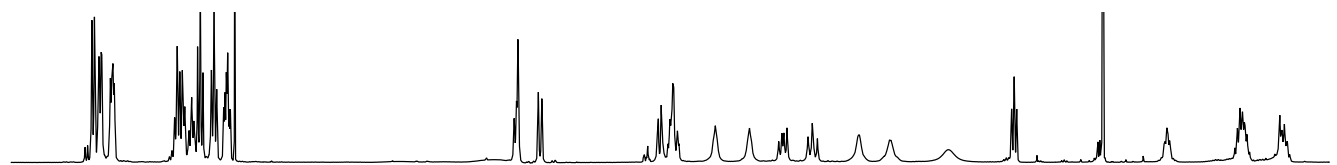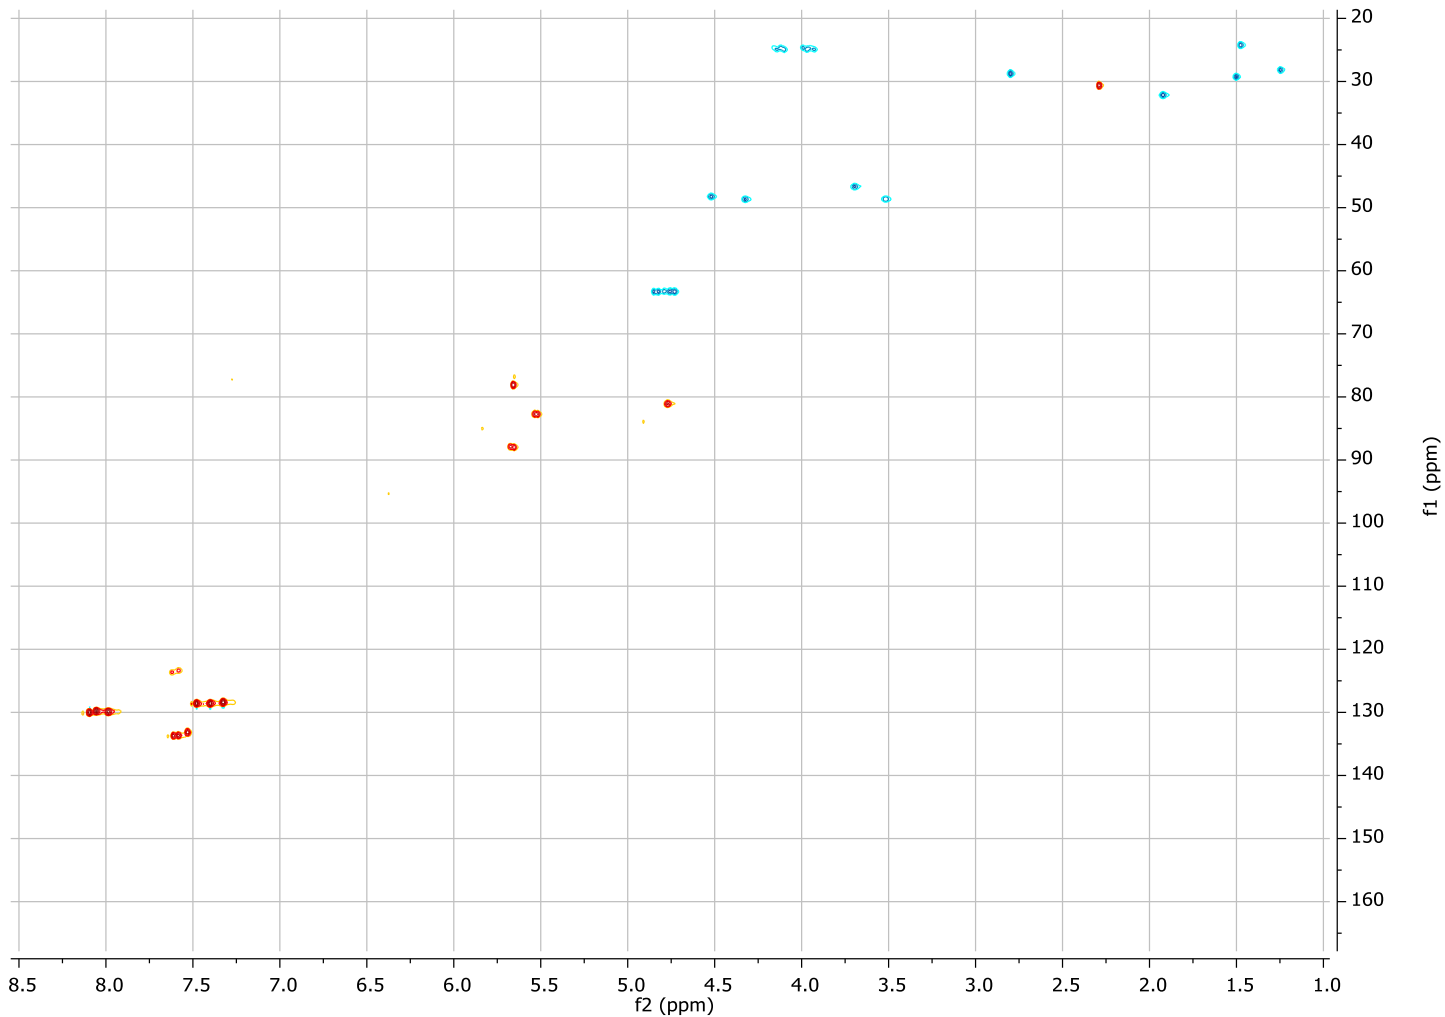

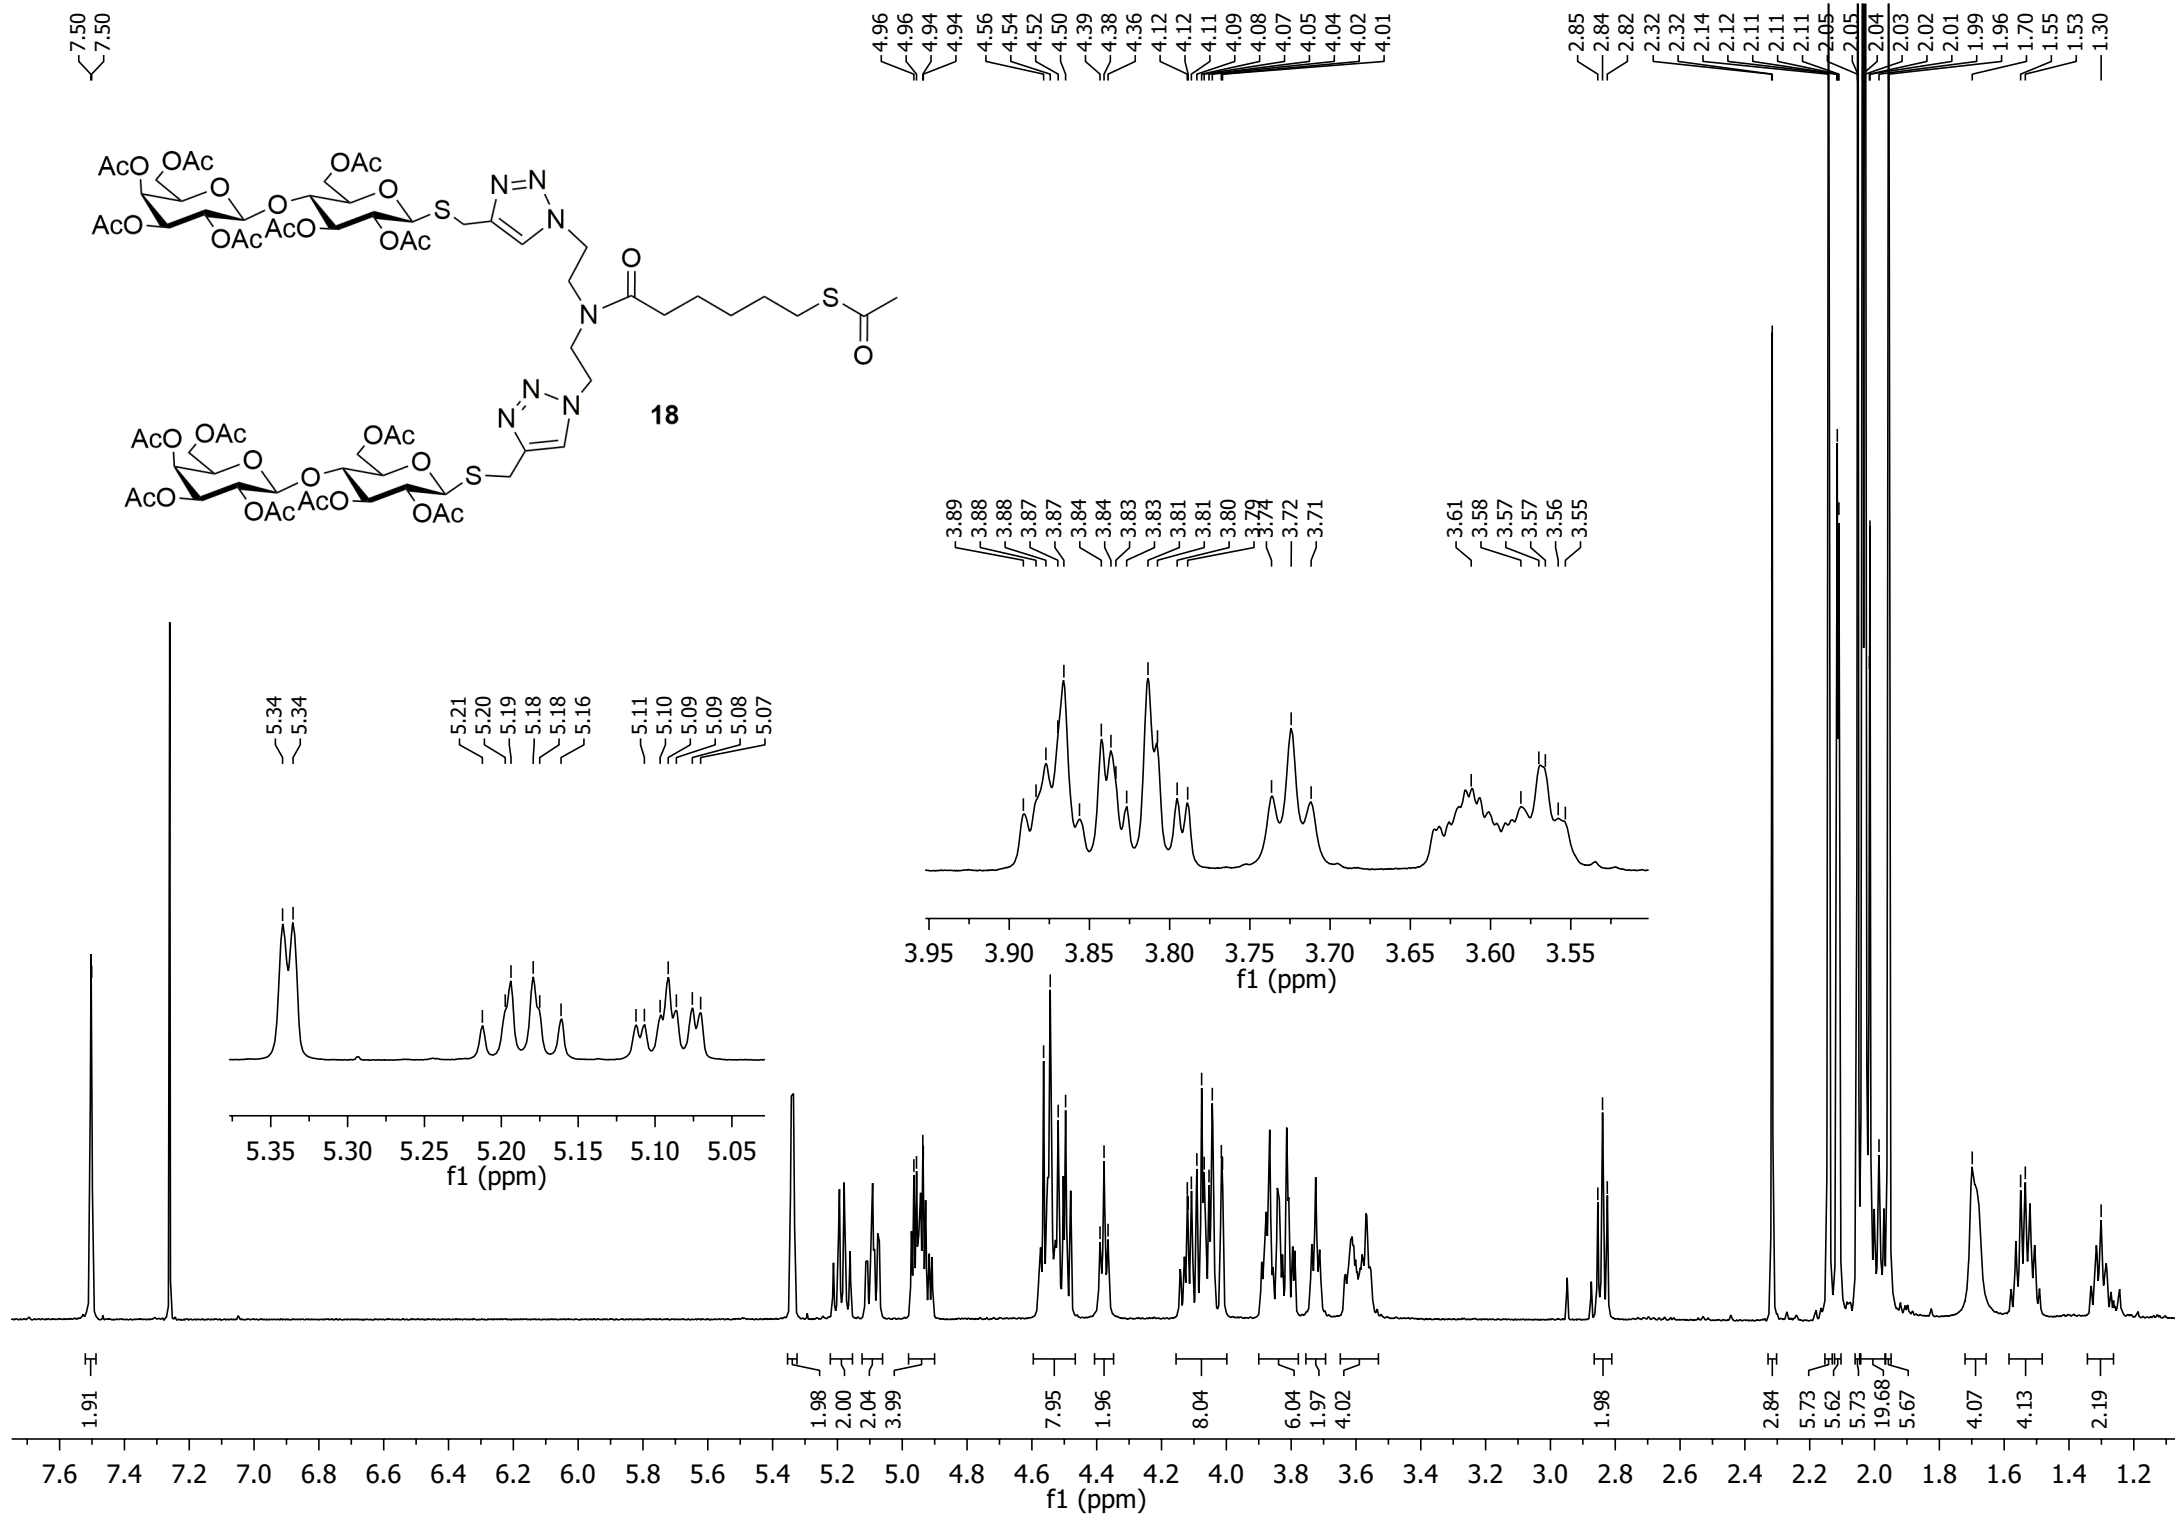

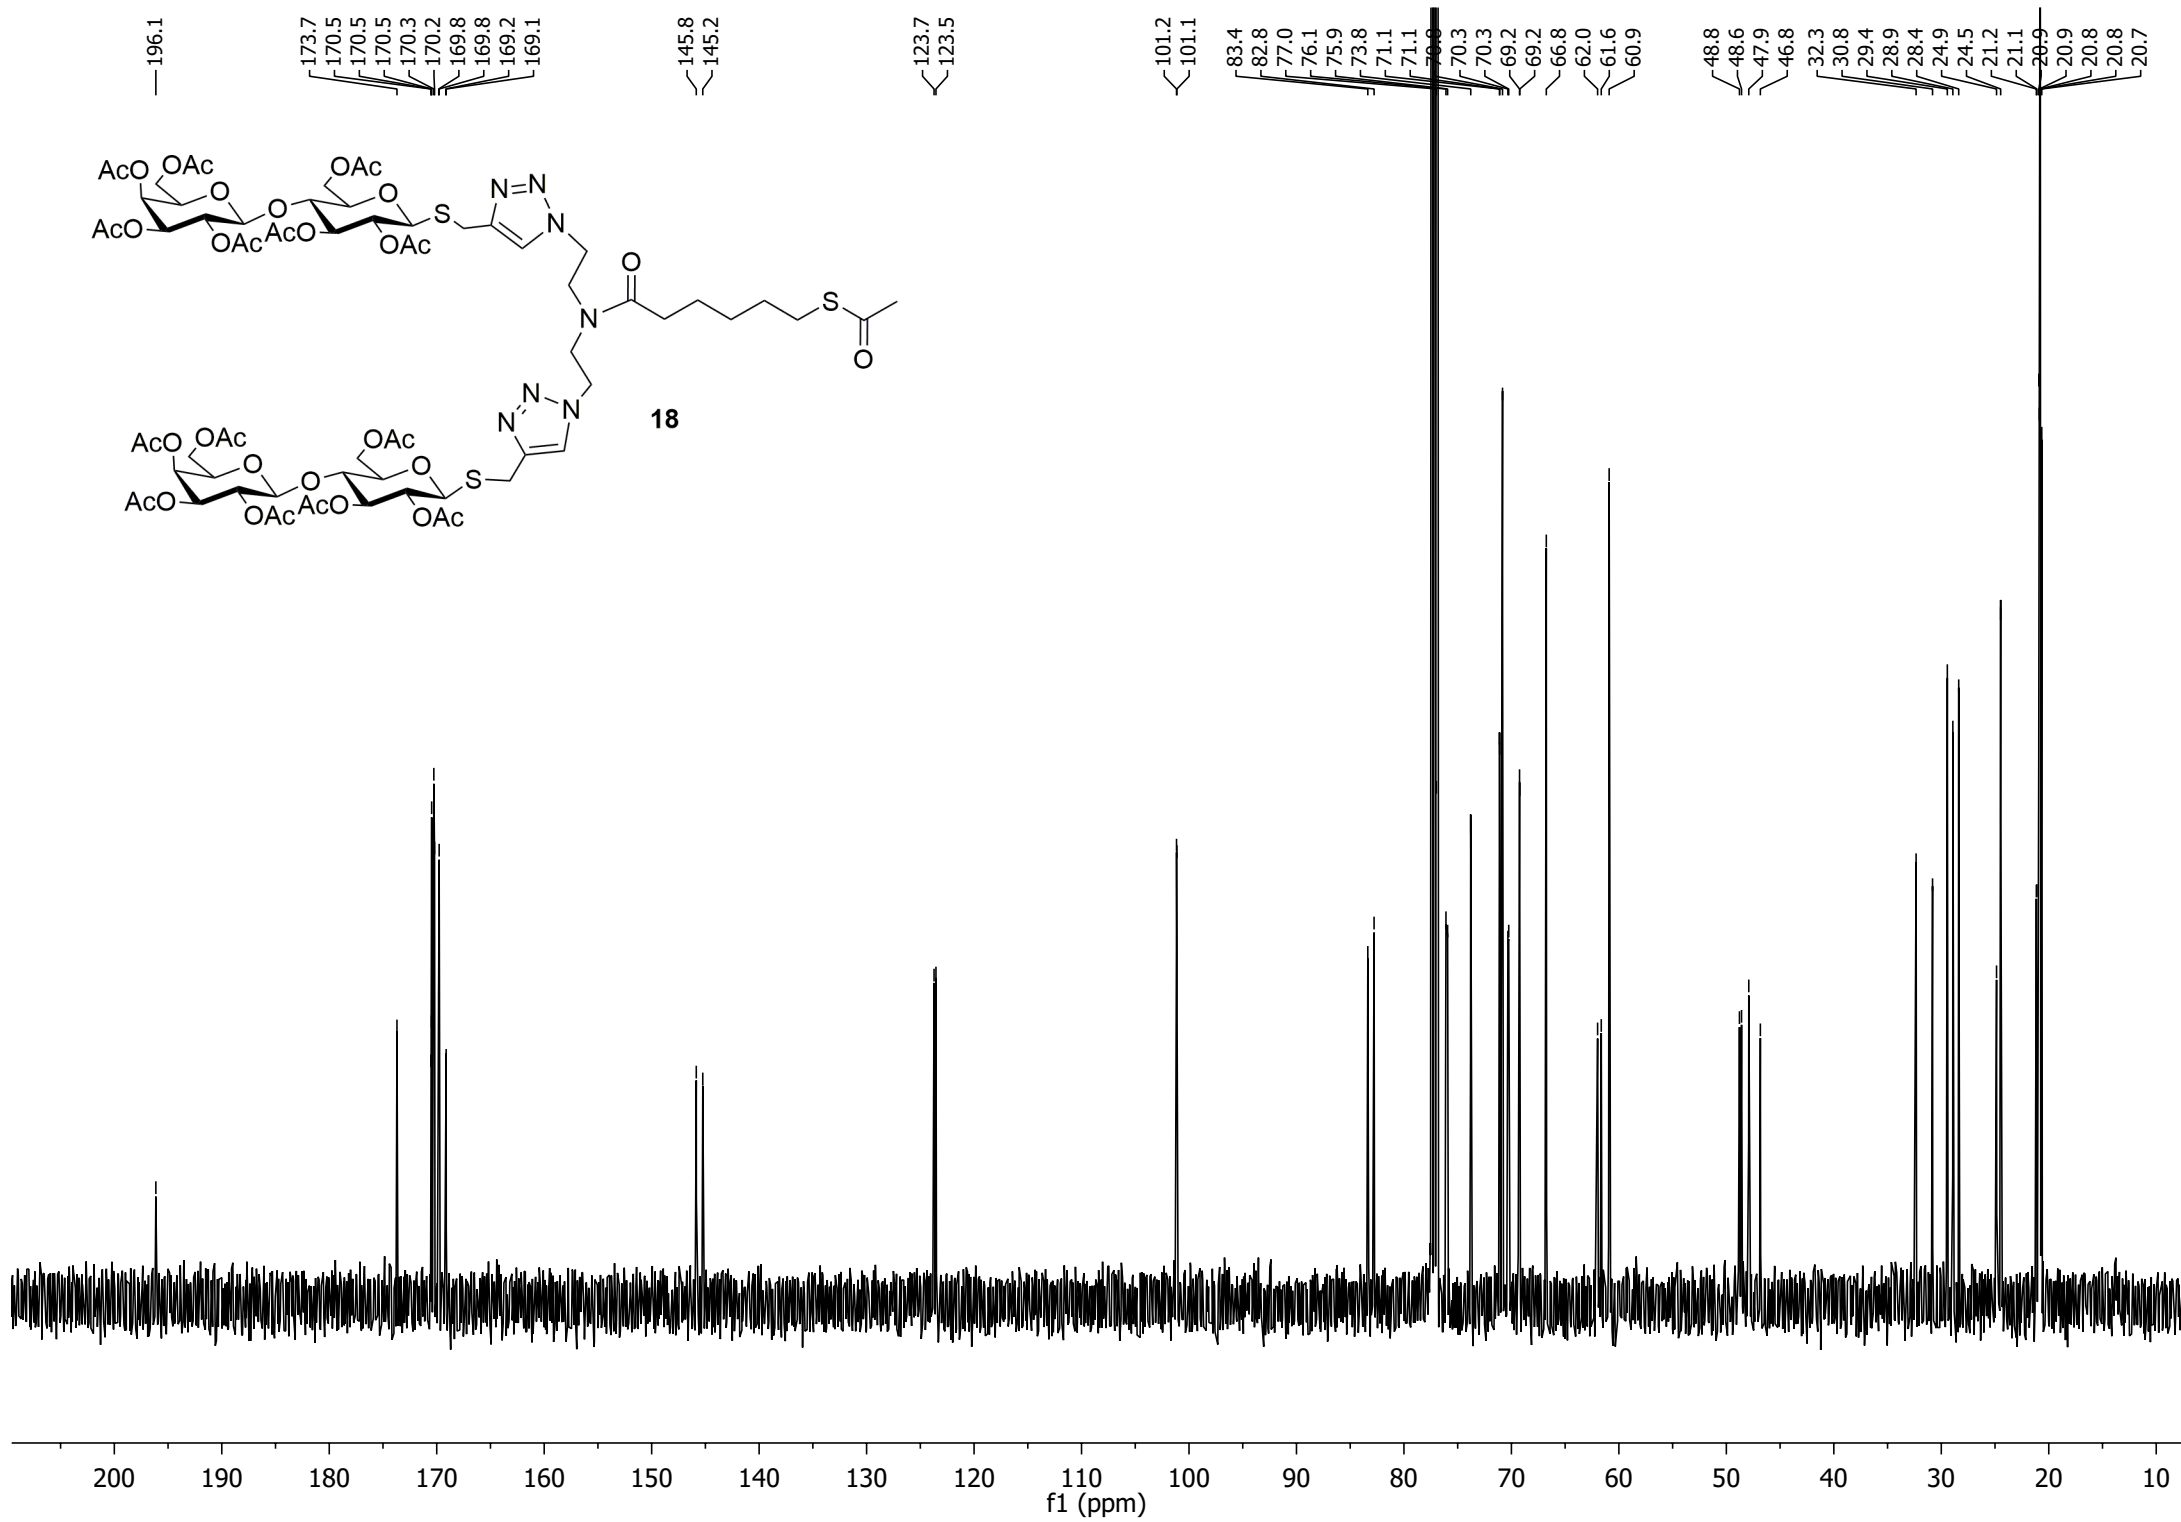

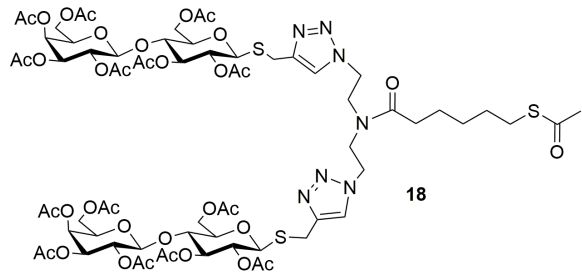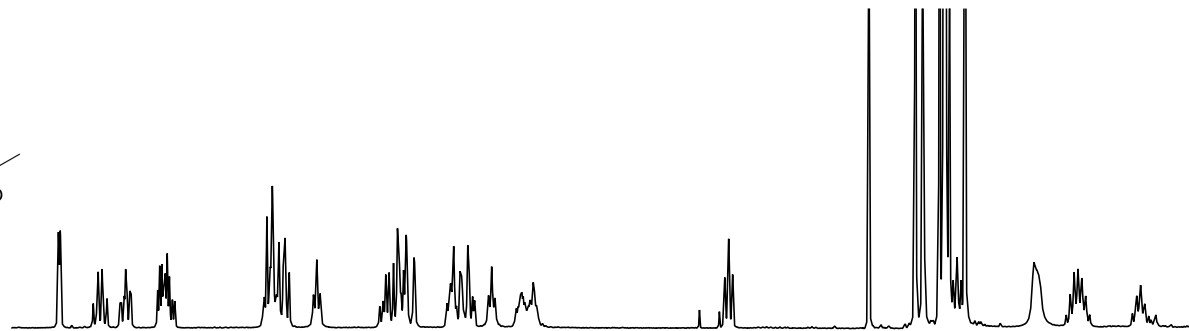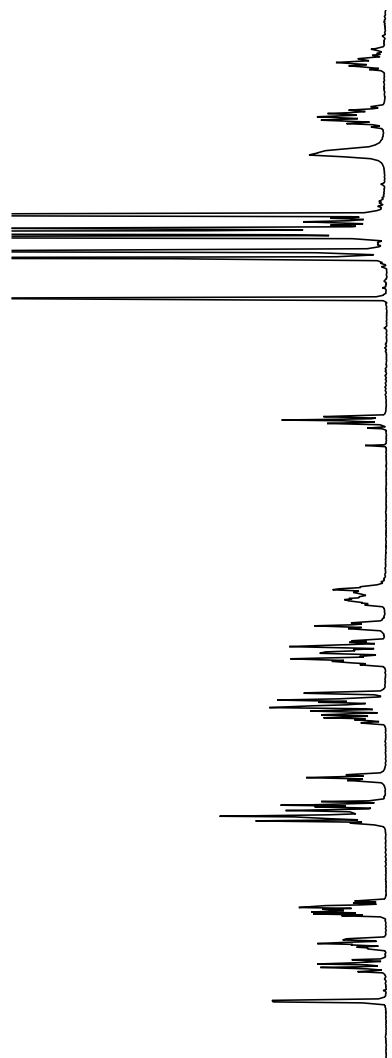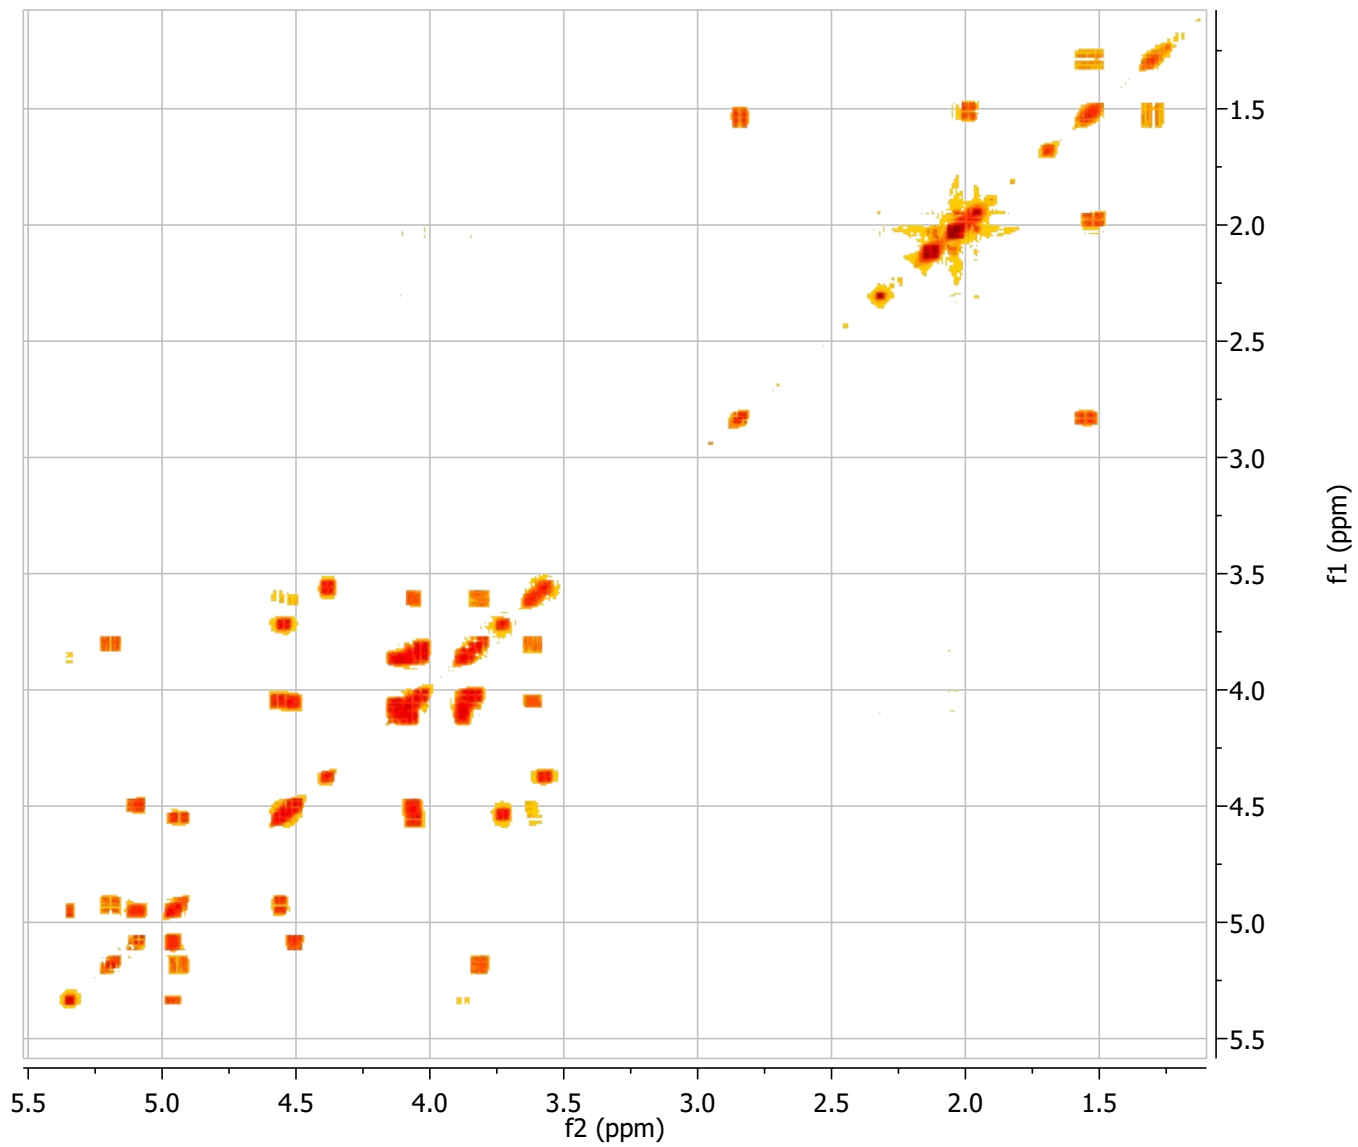

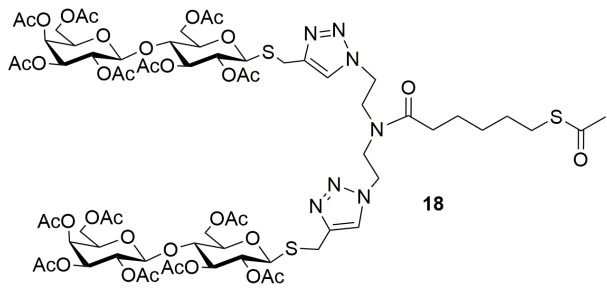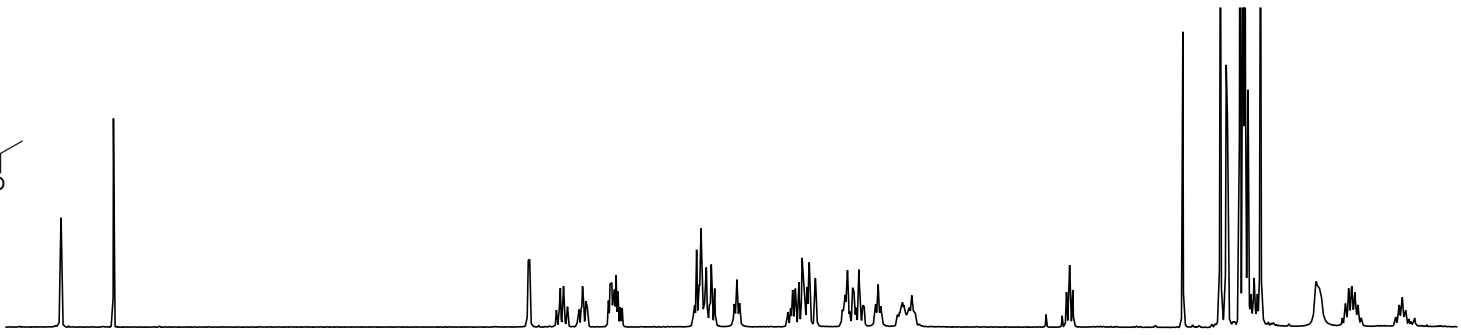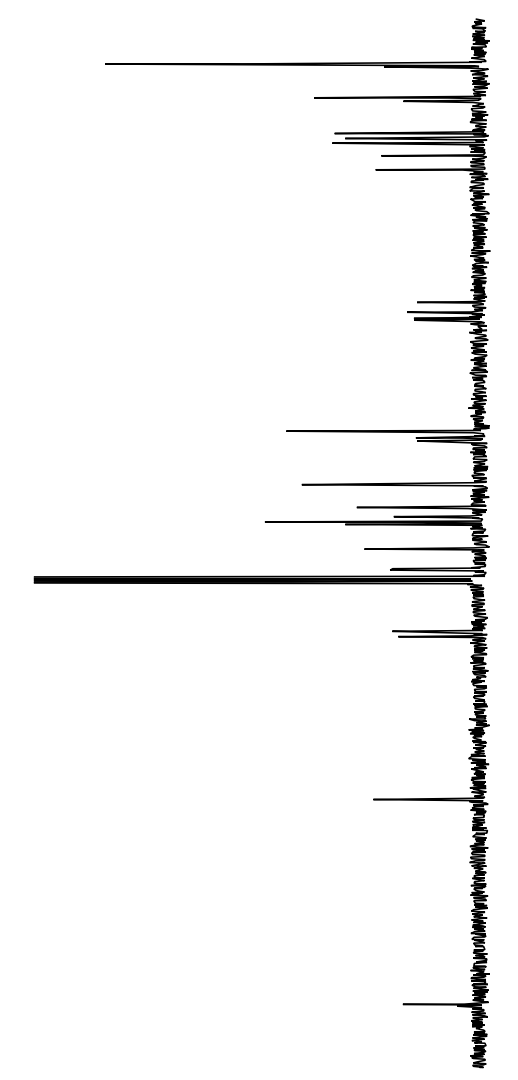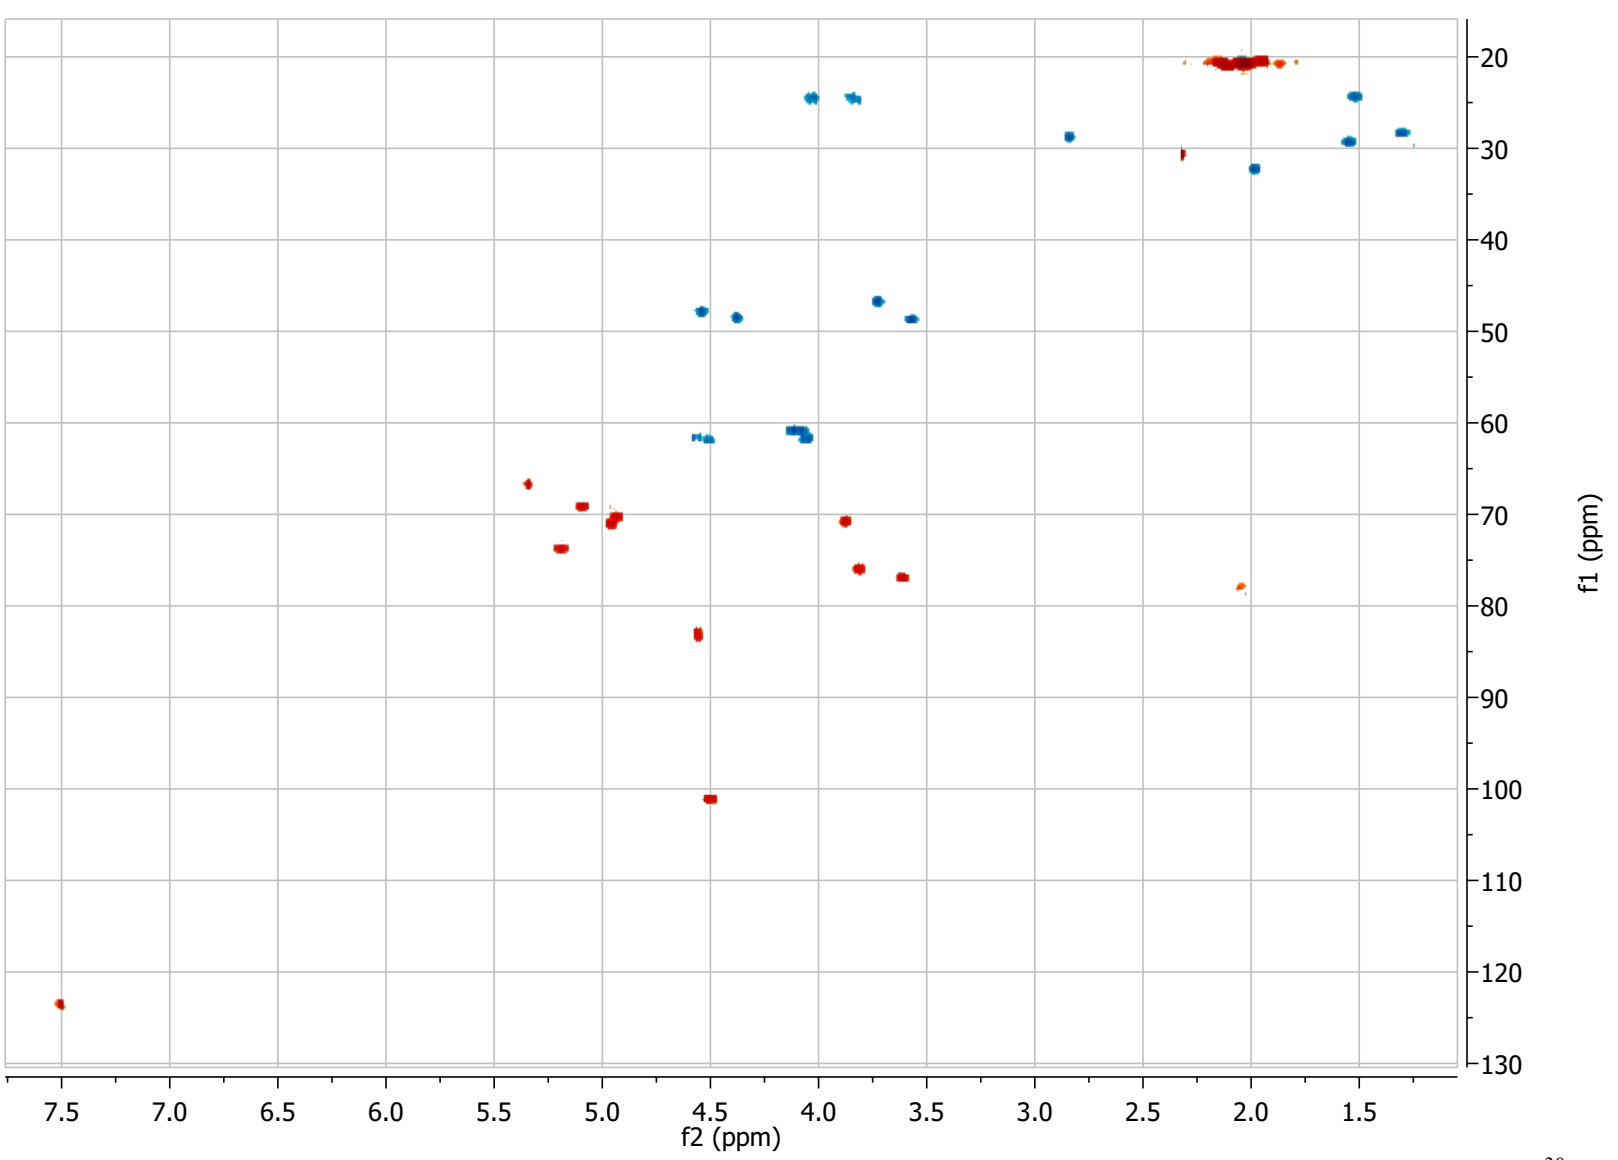

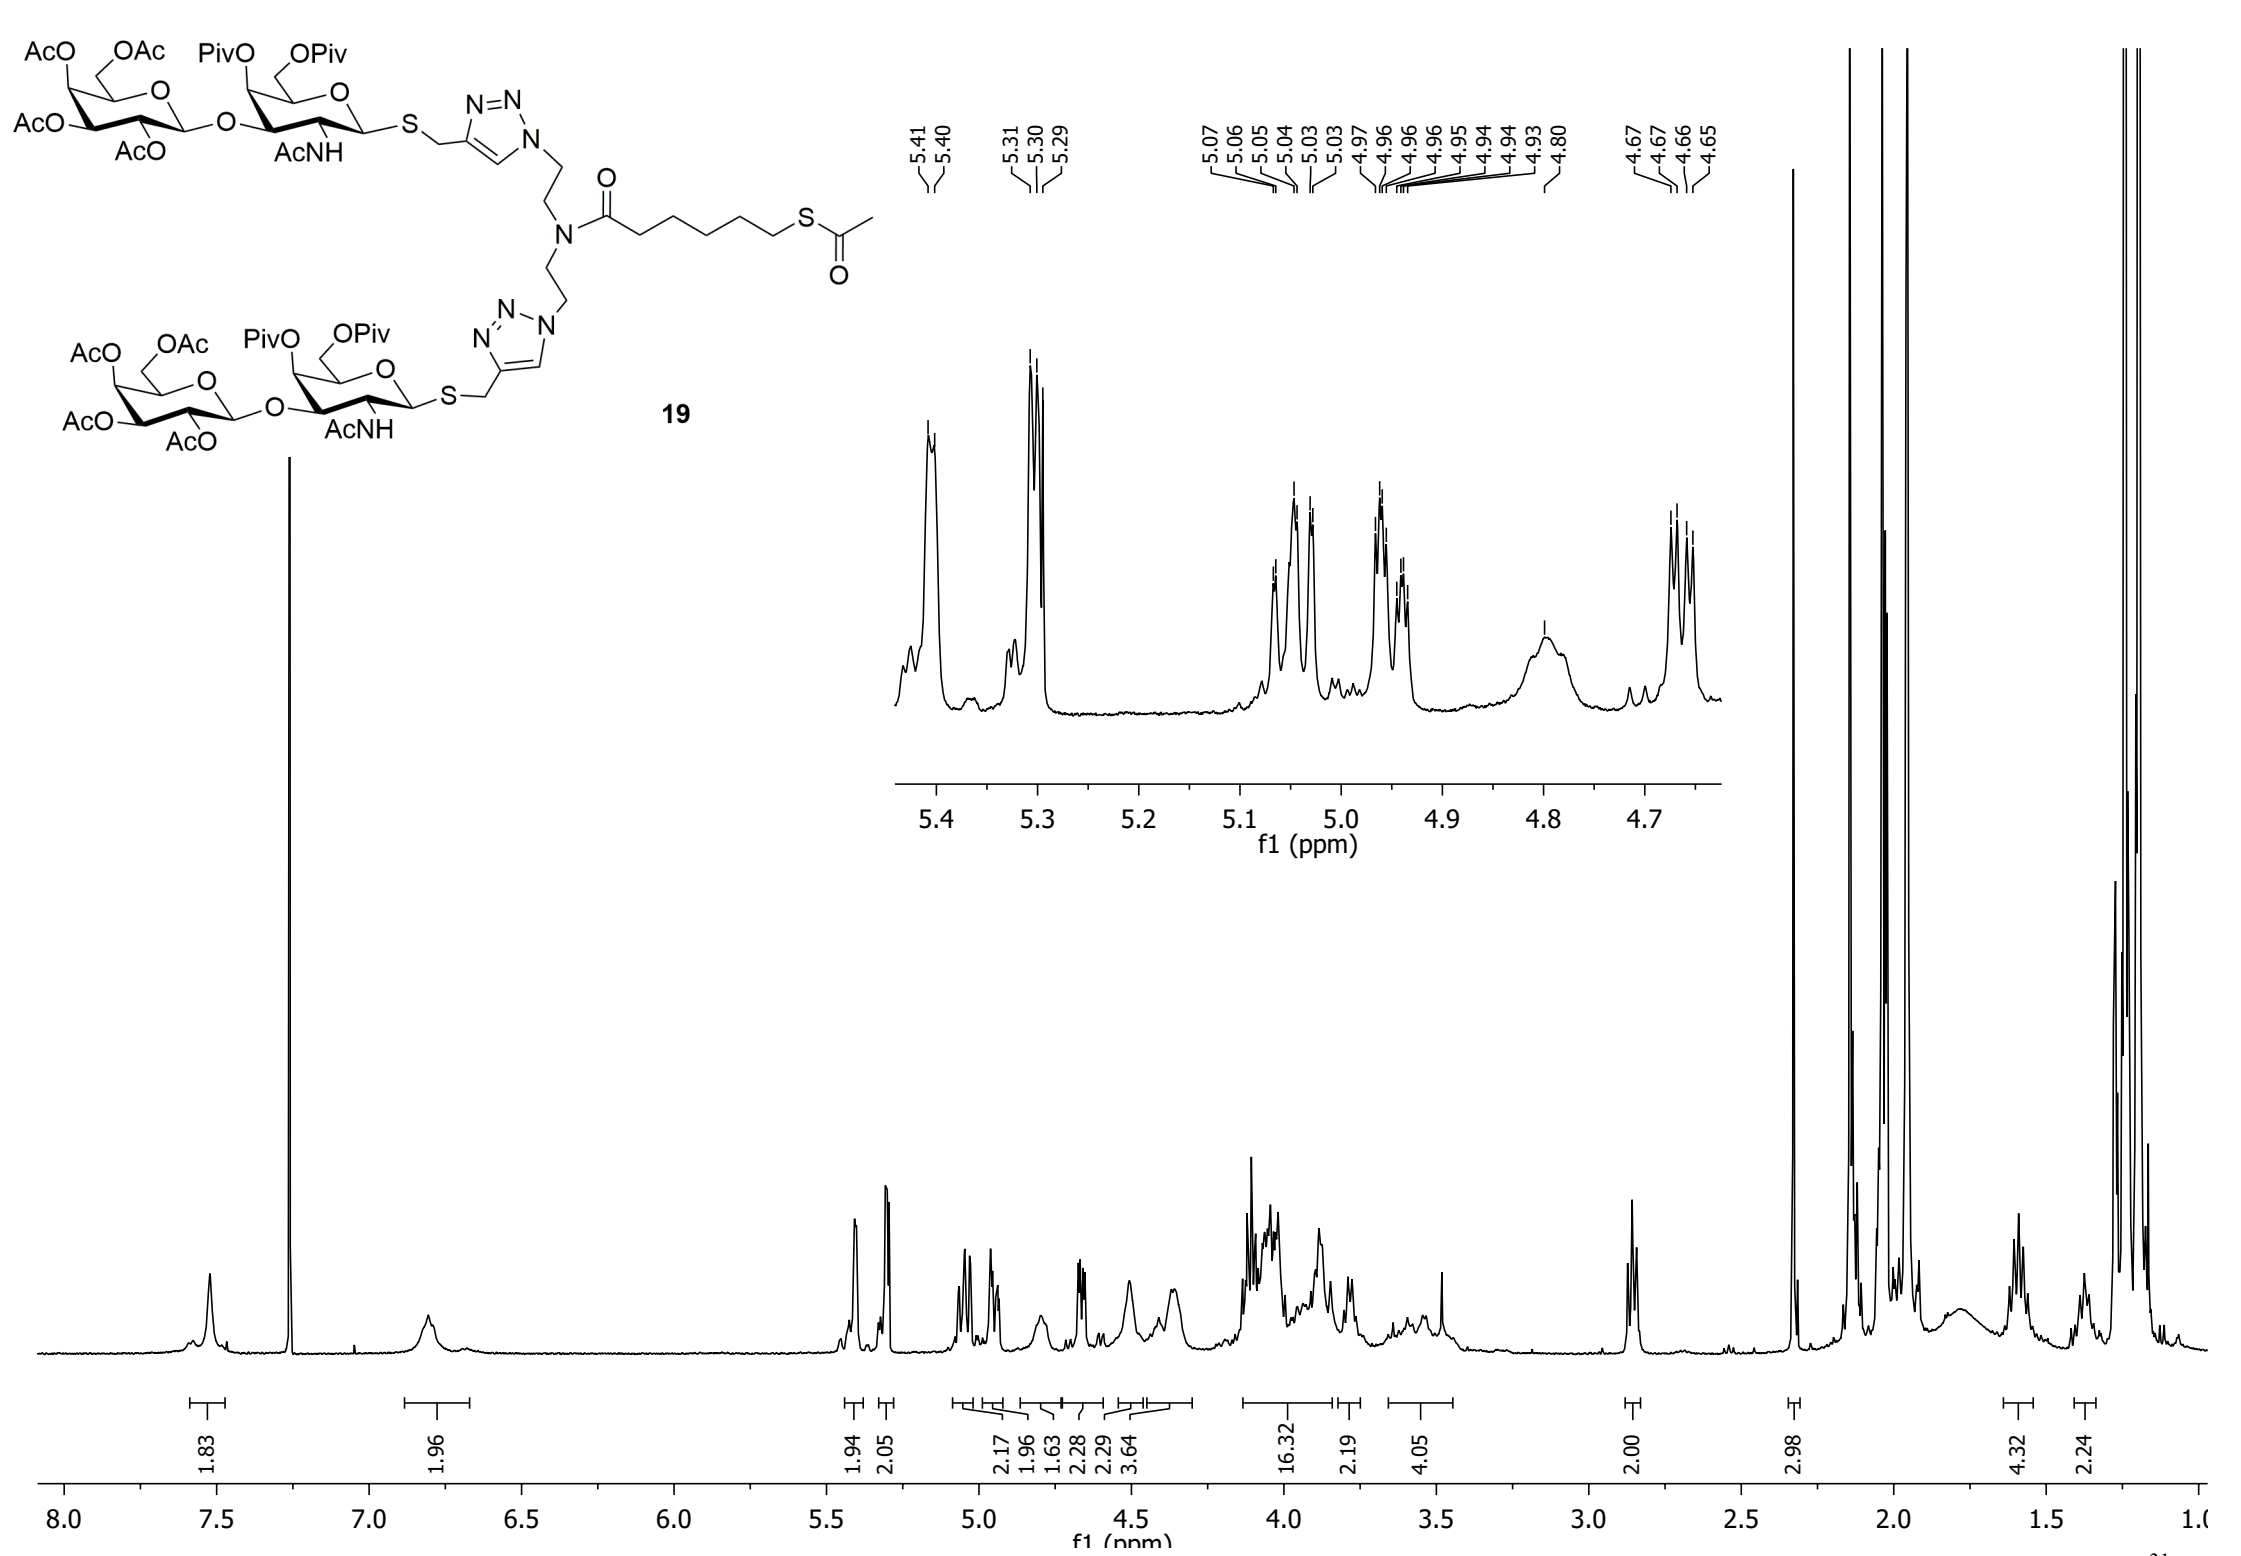

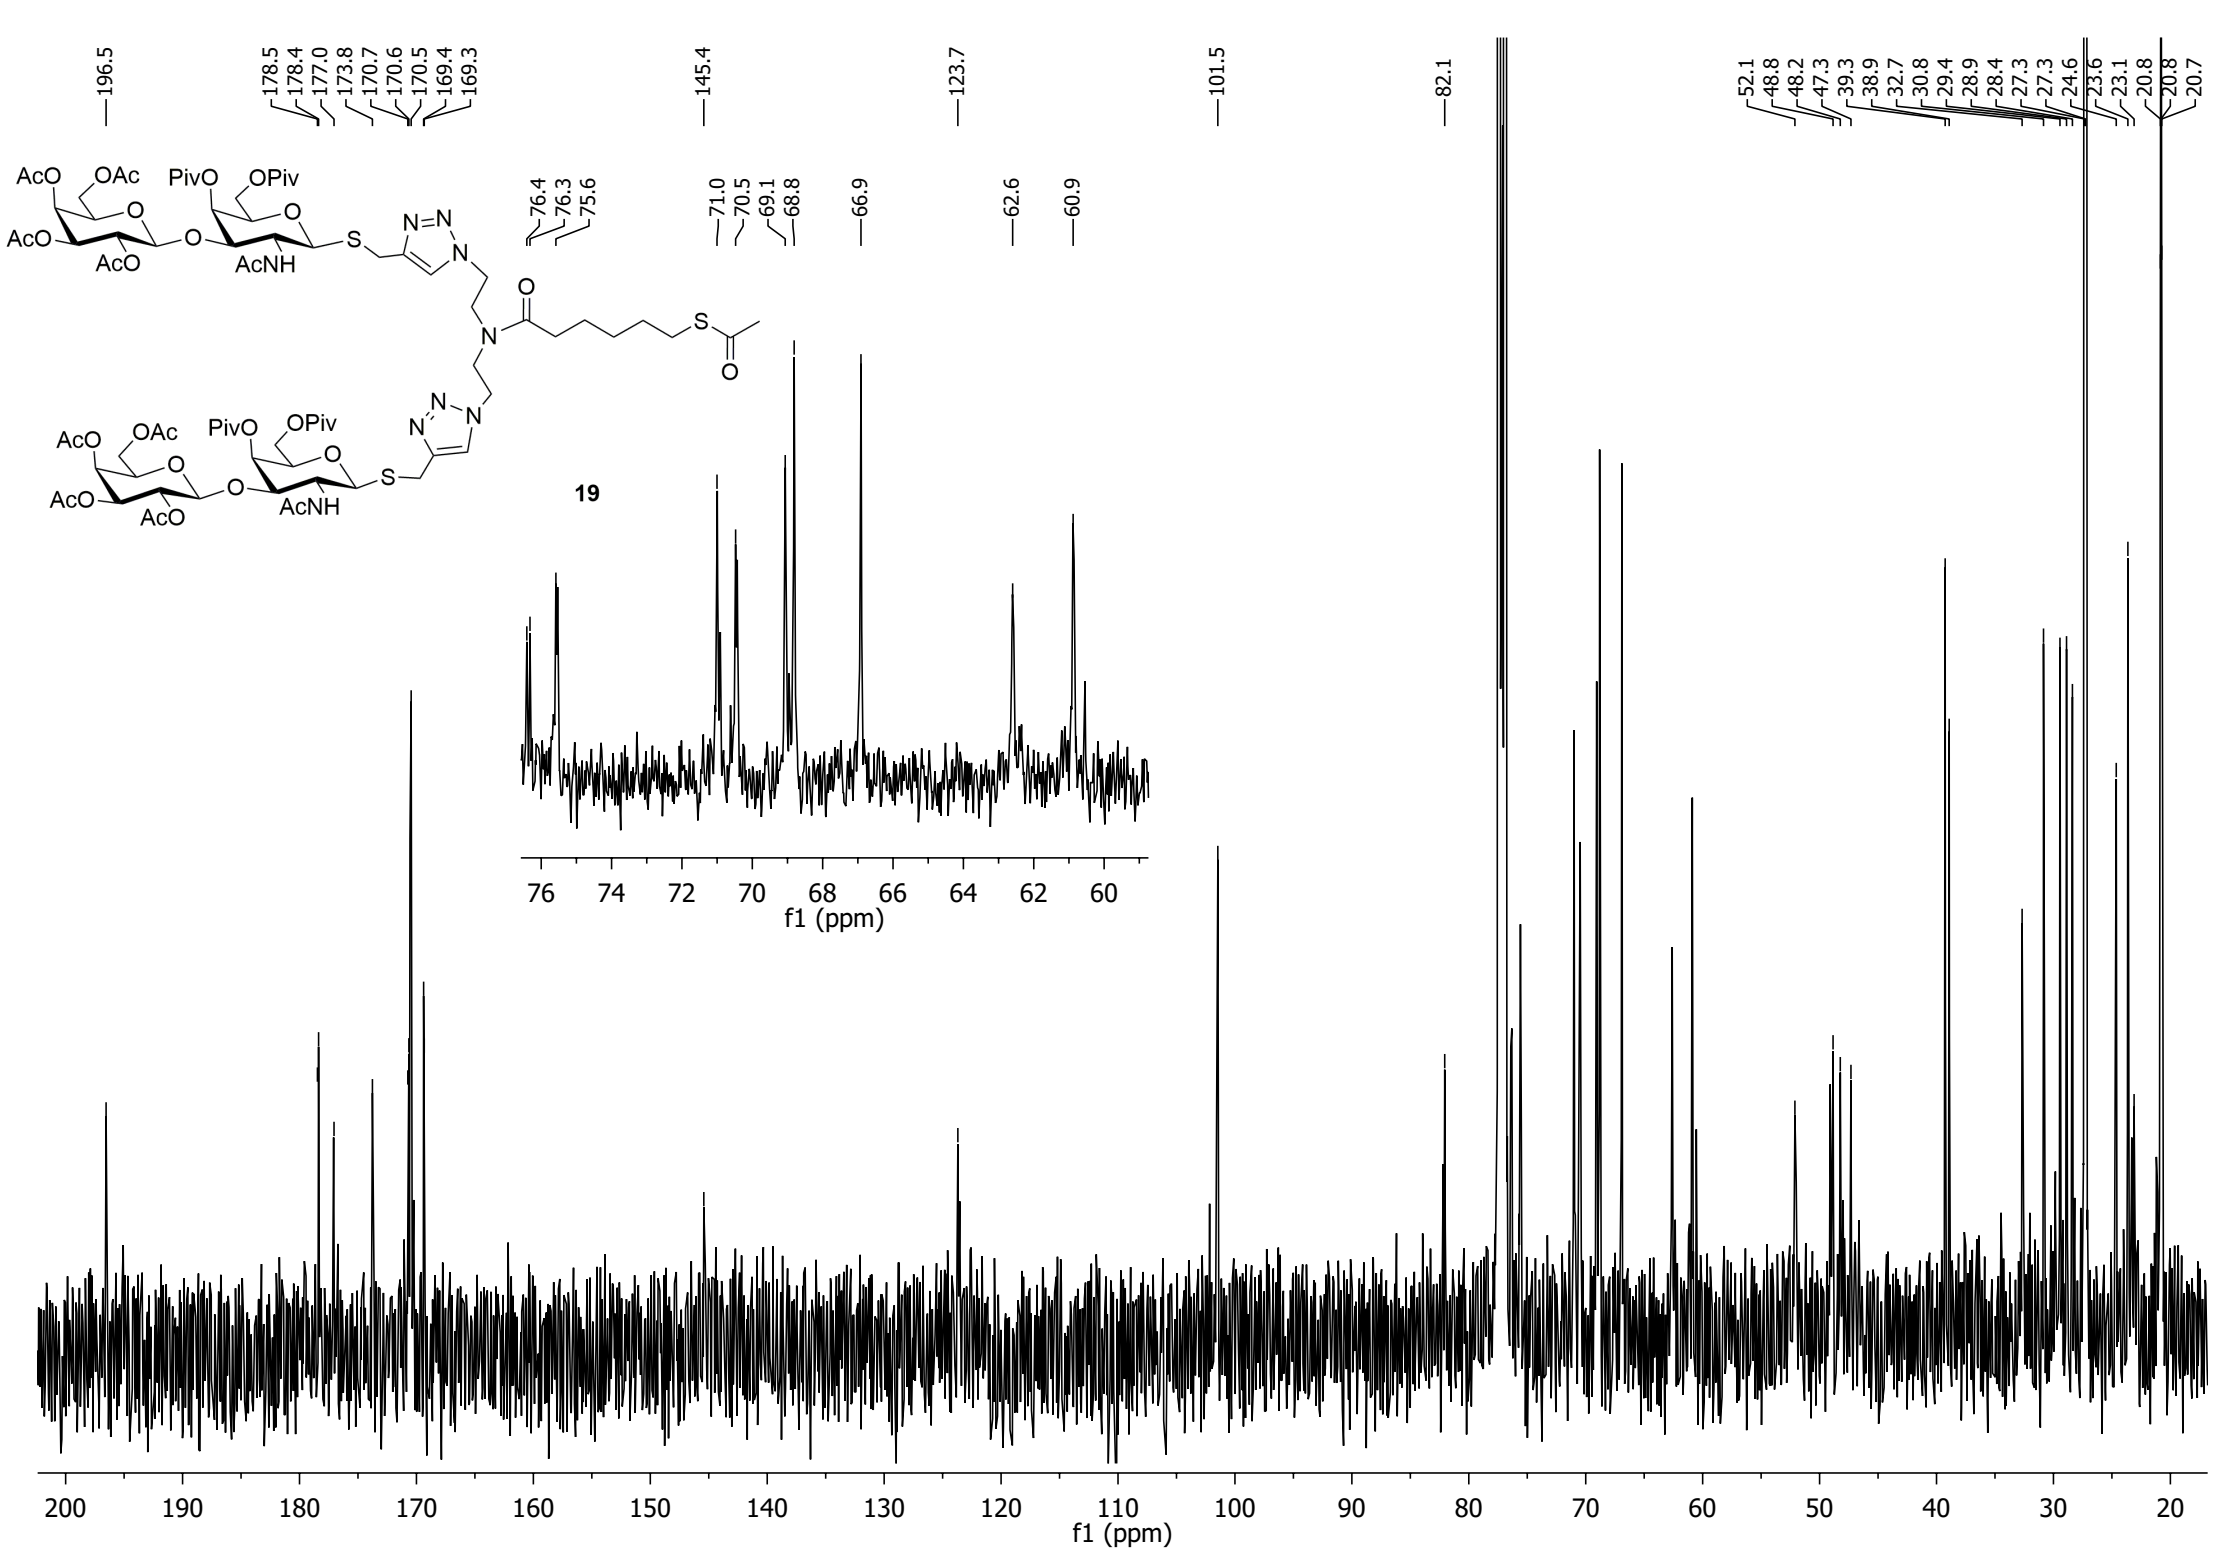



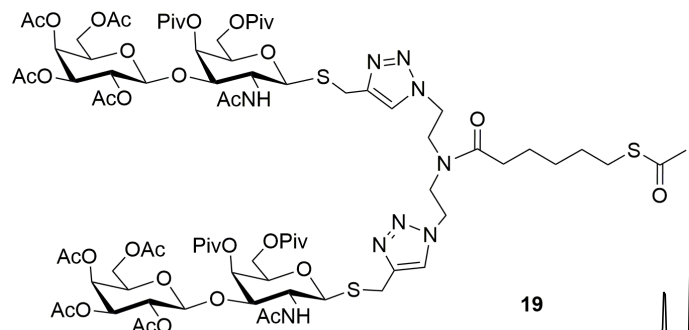

19

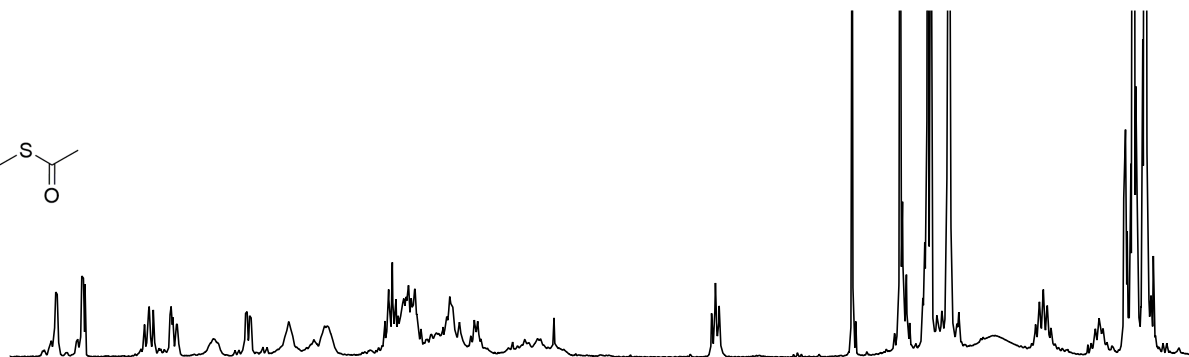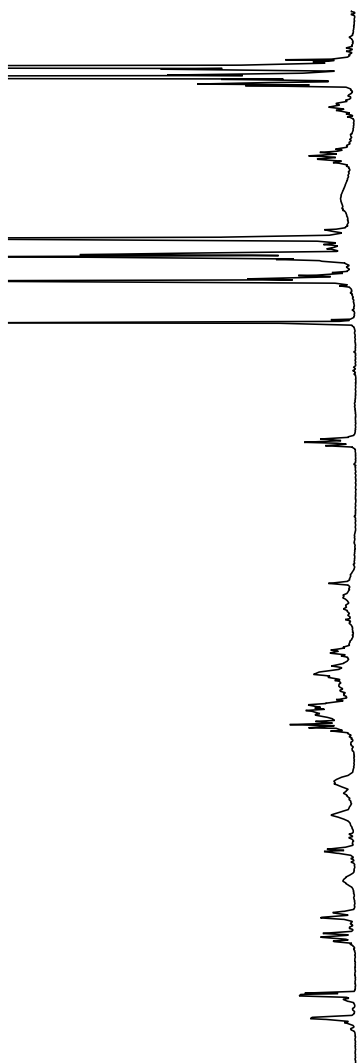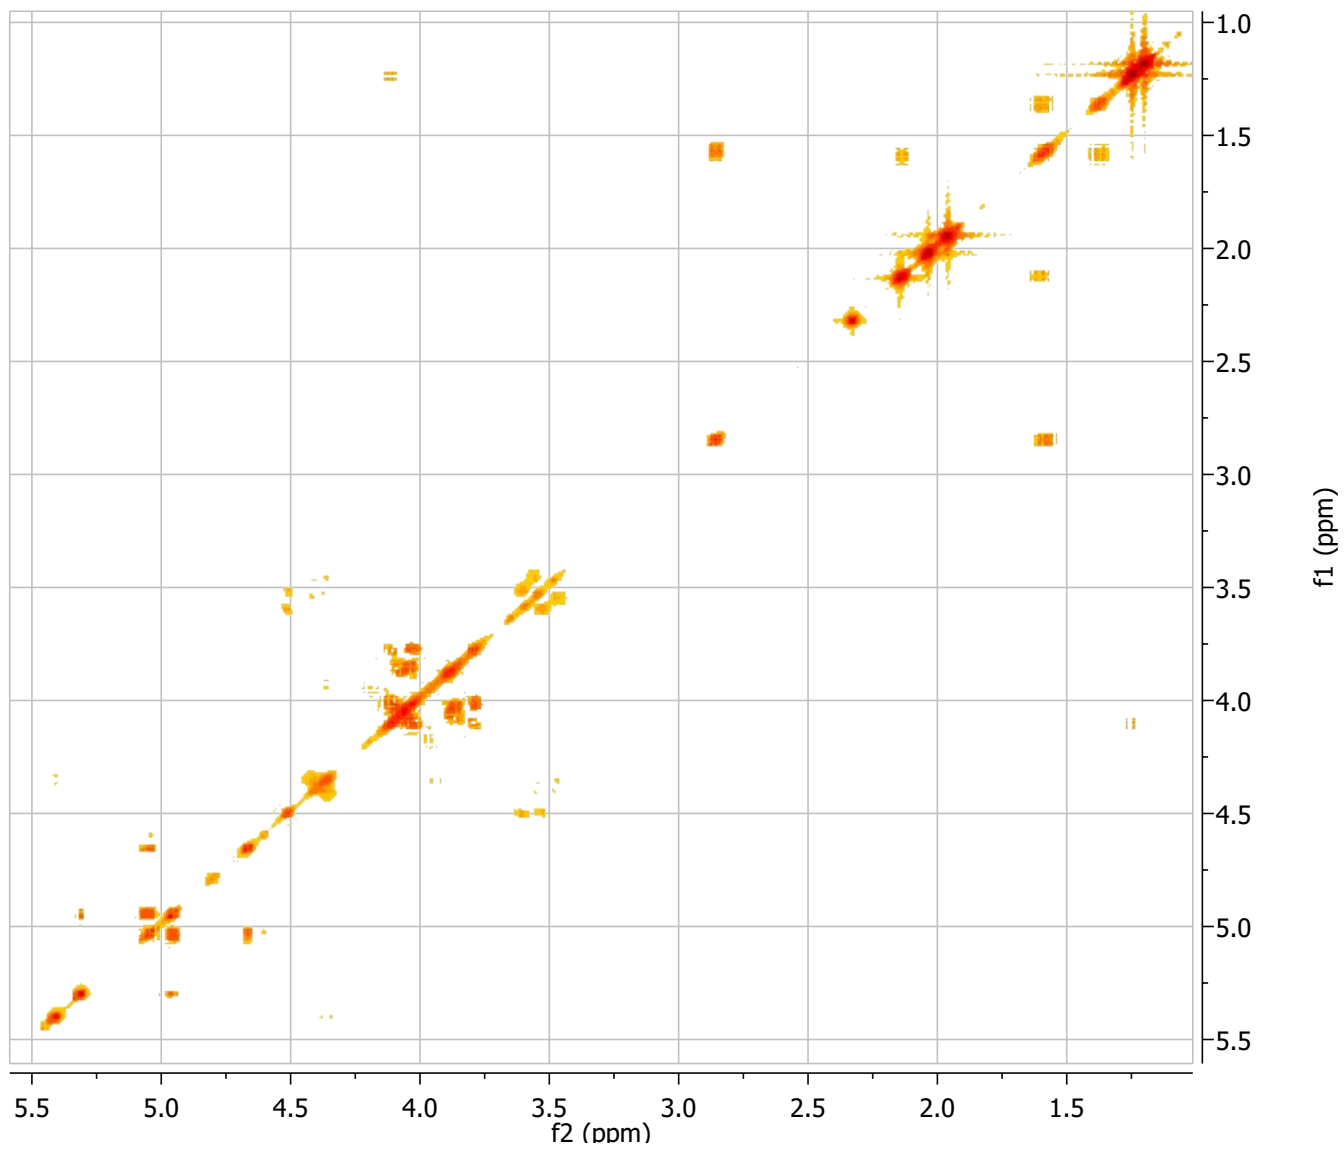

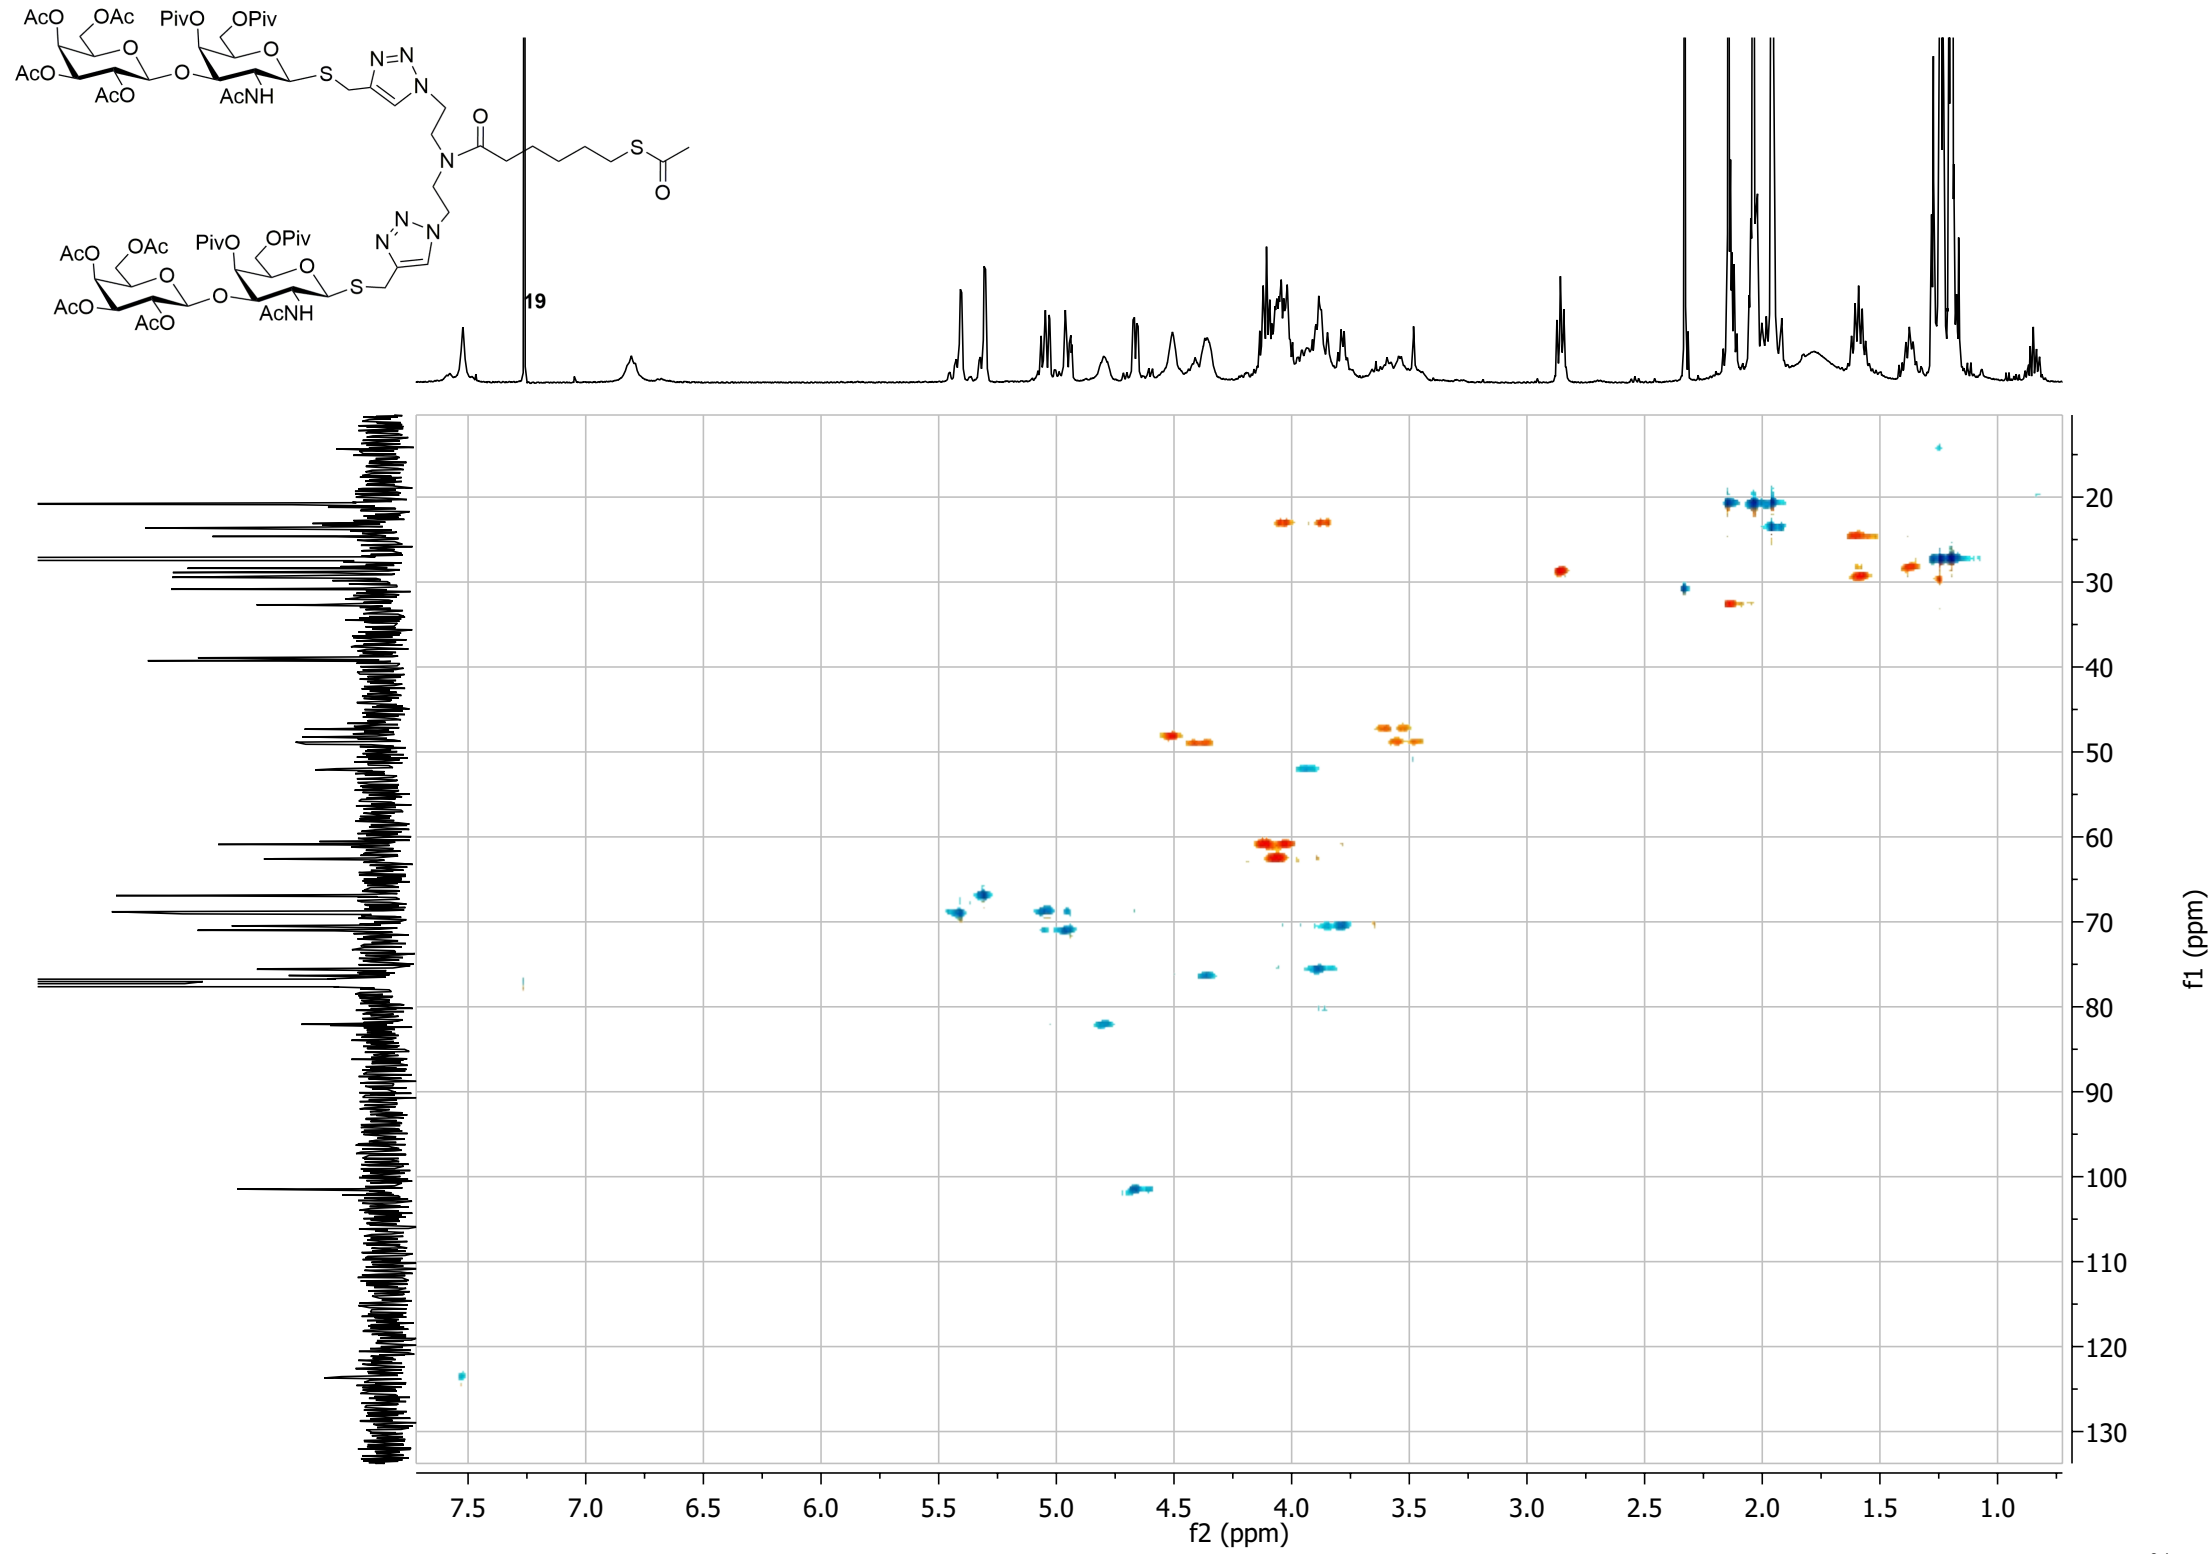

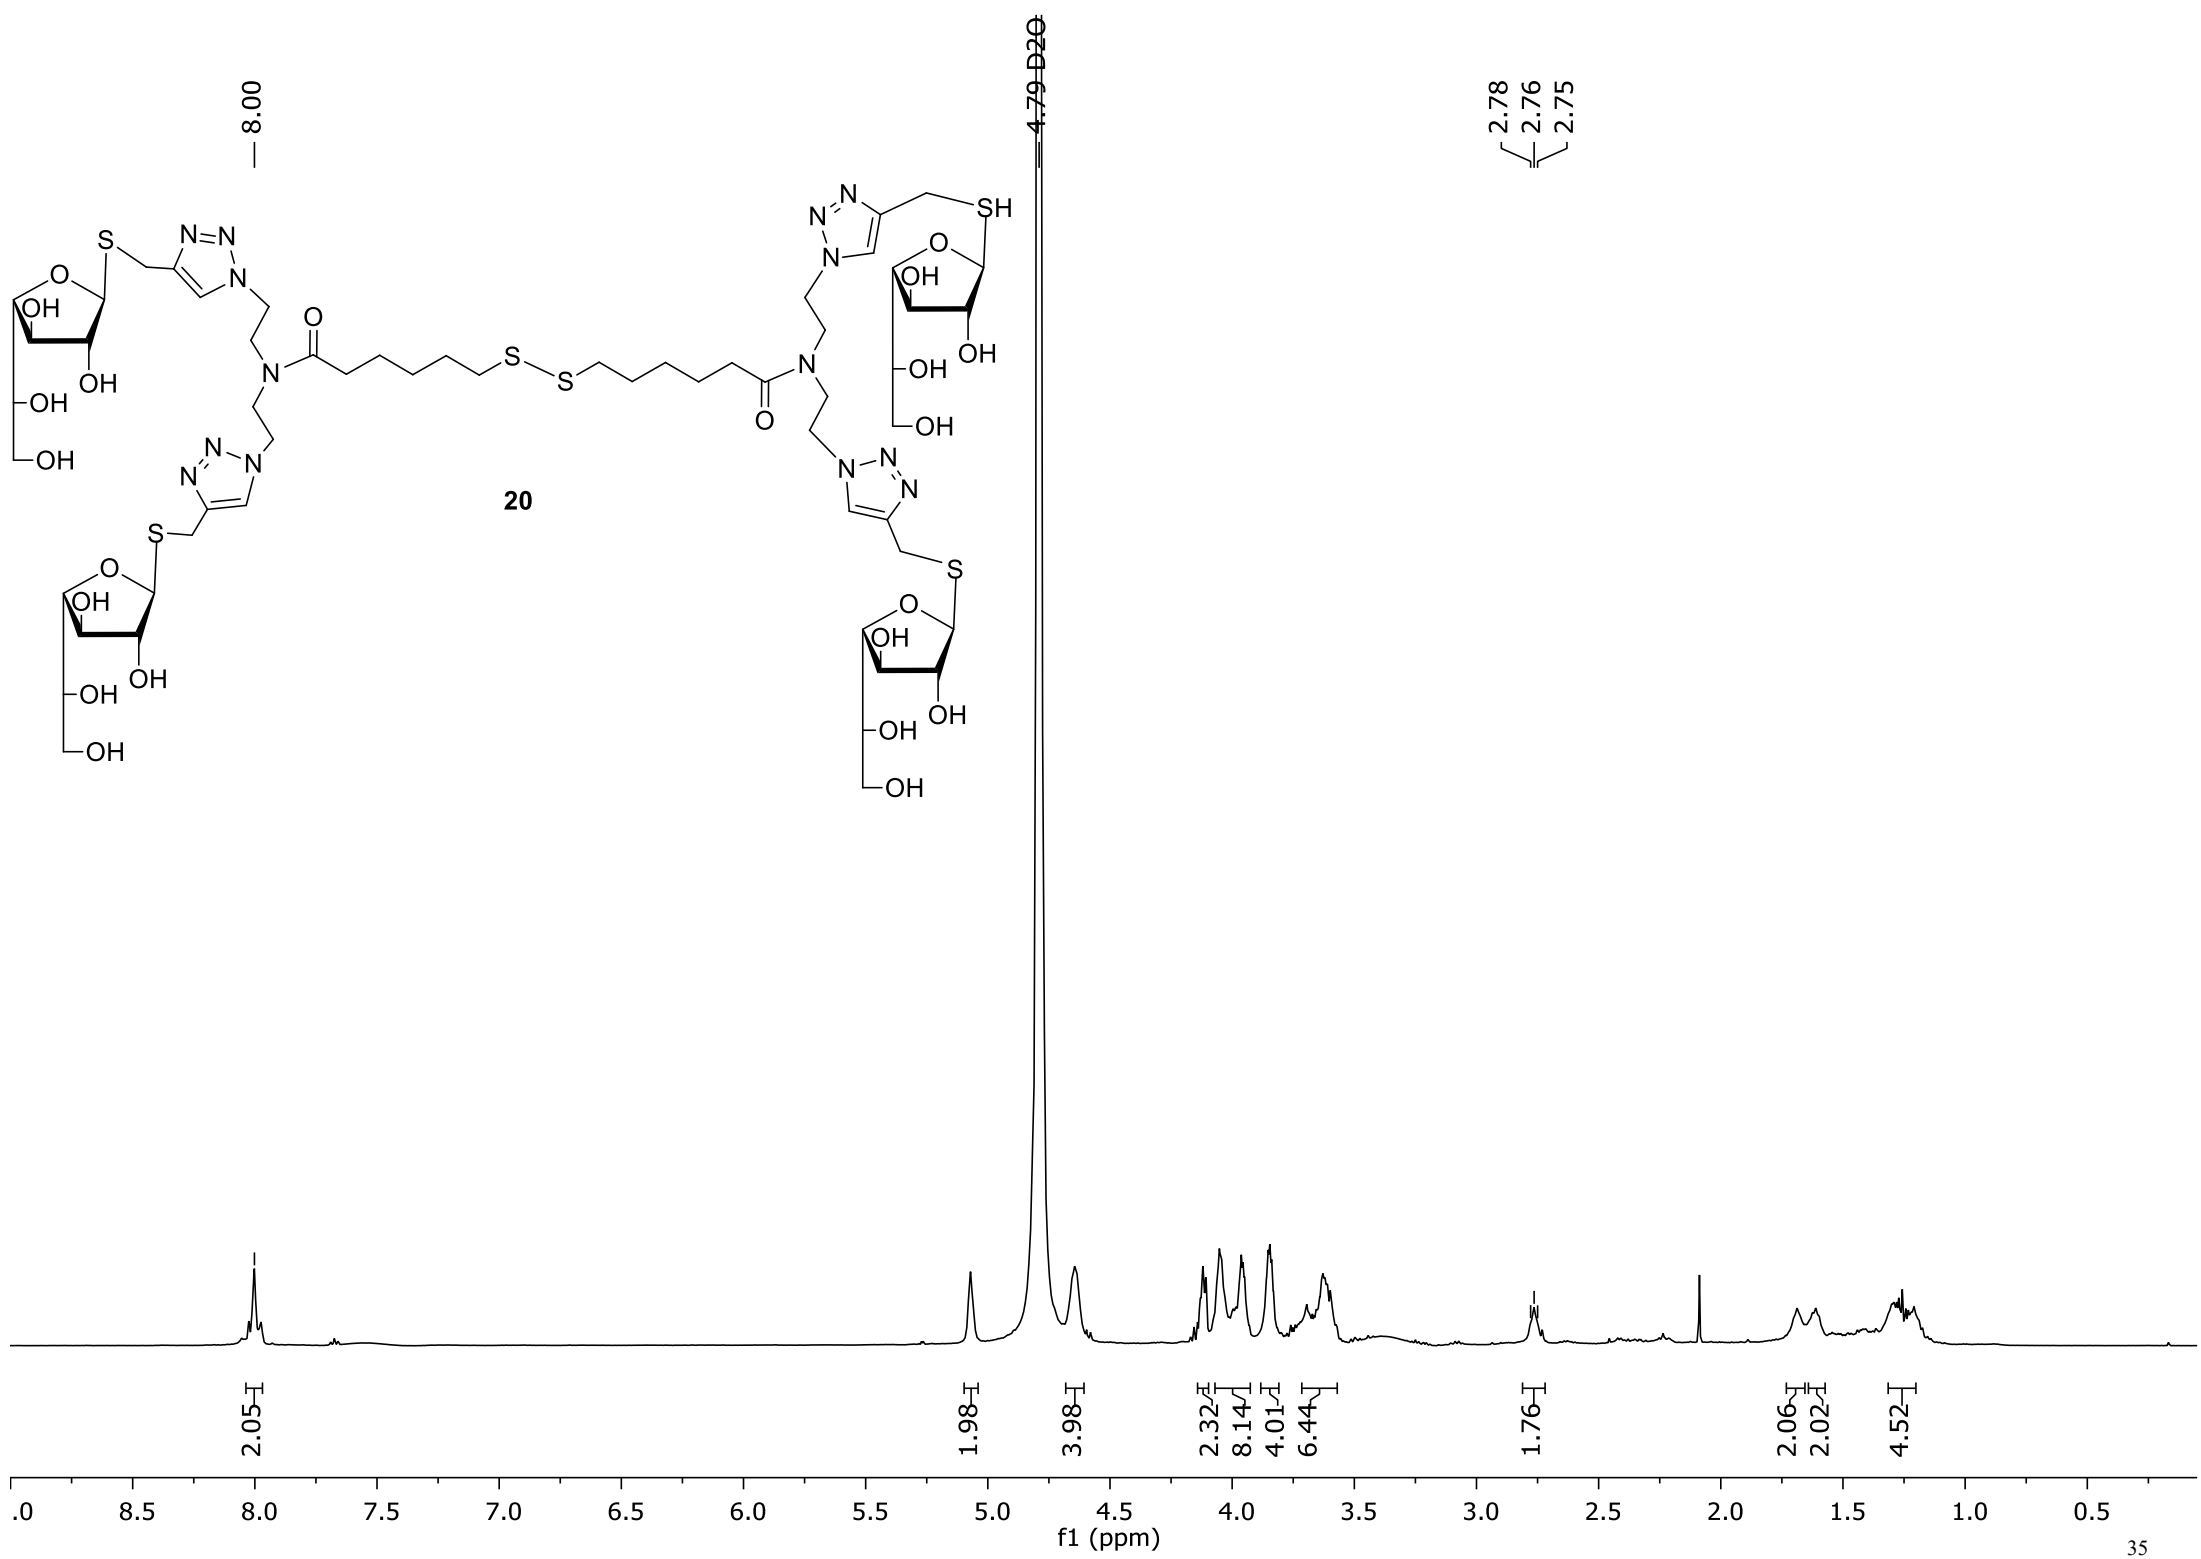

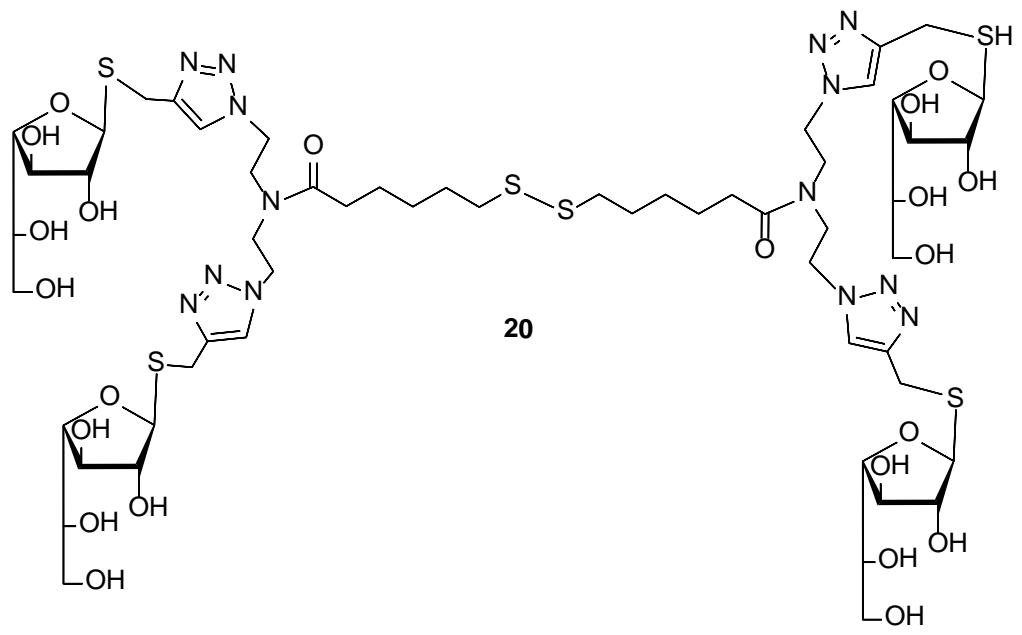

20

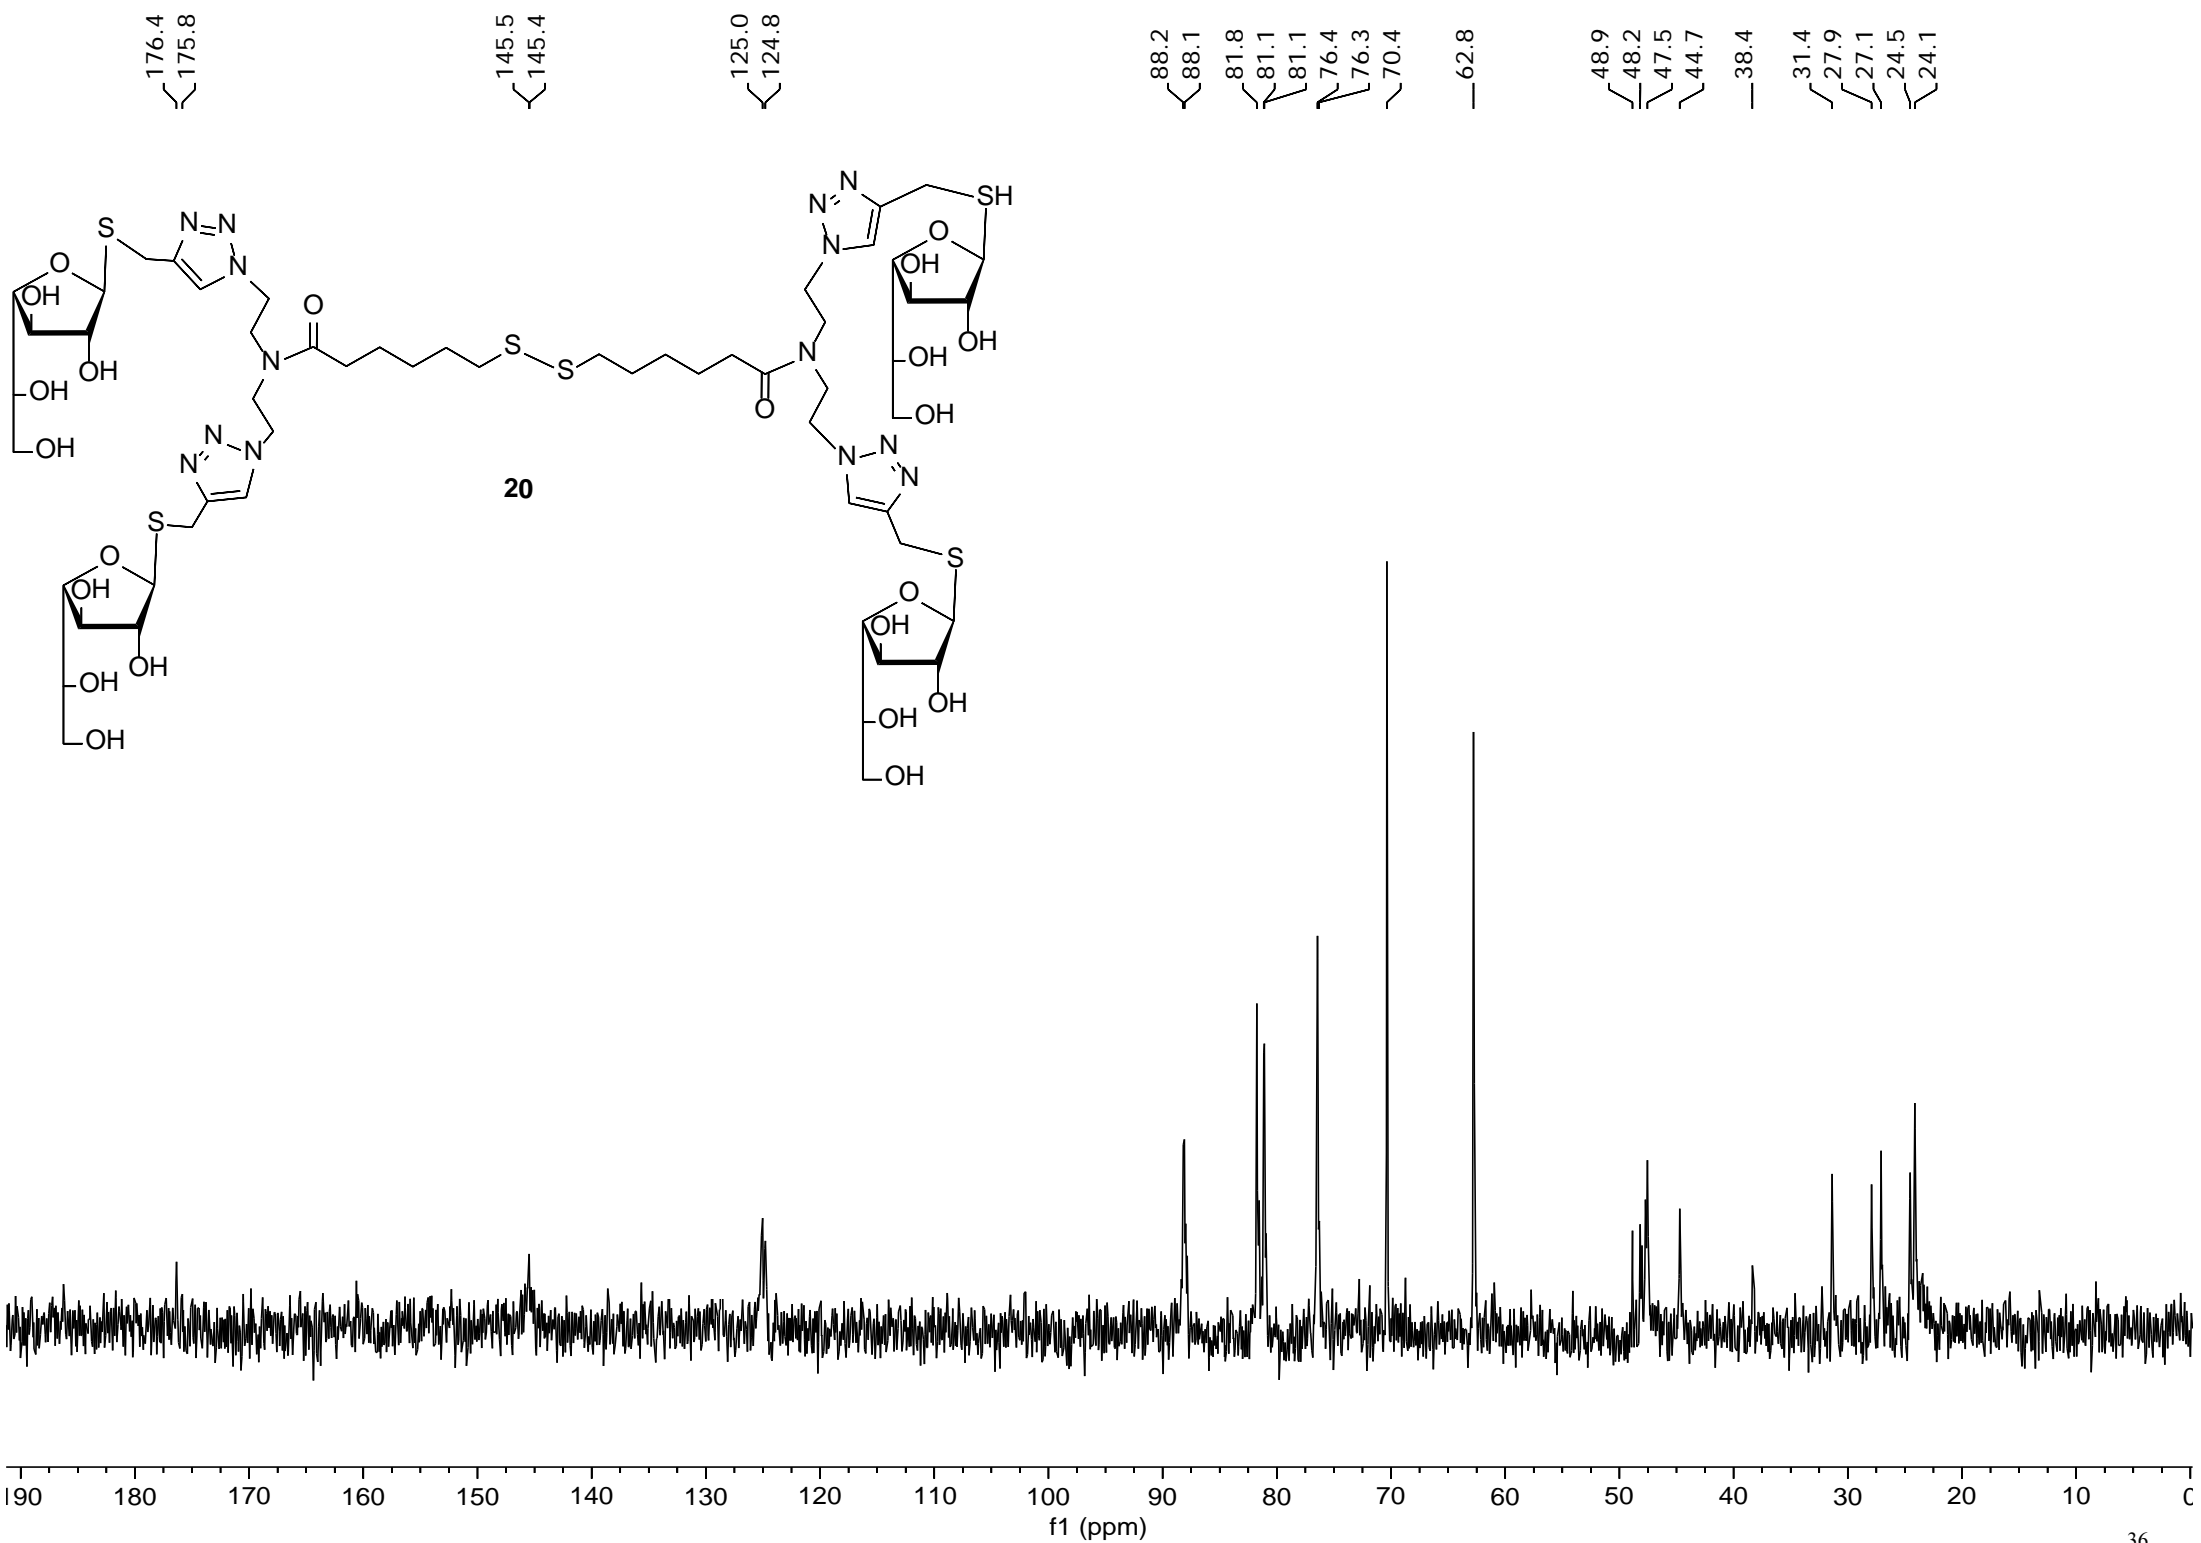

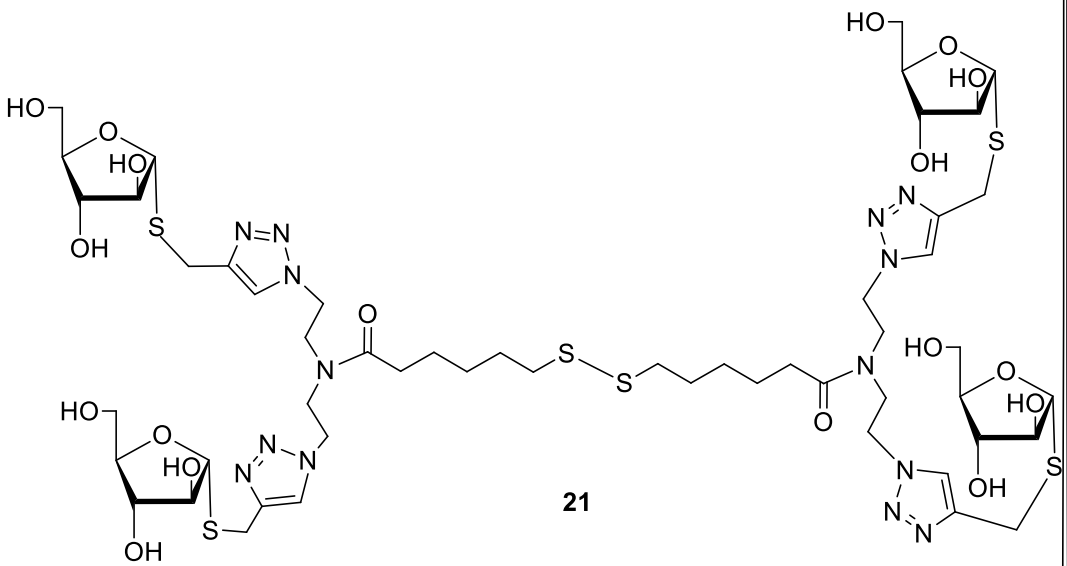

21

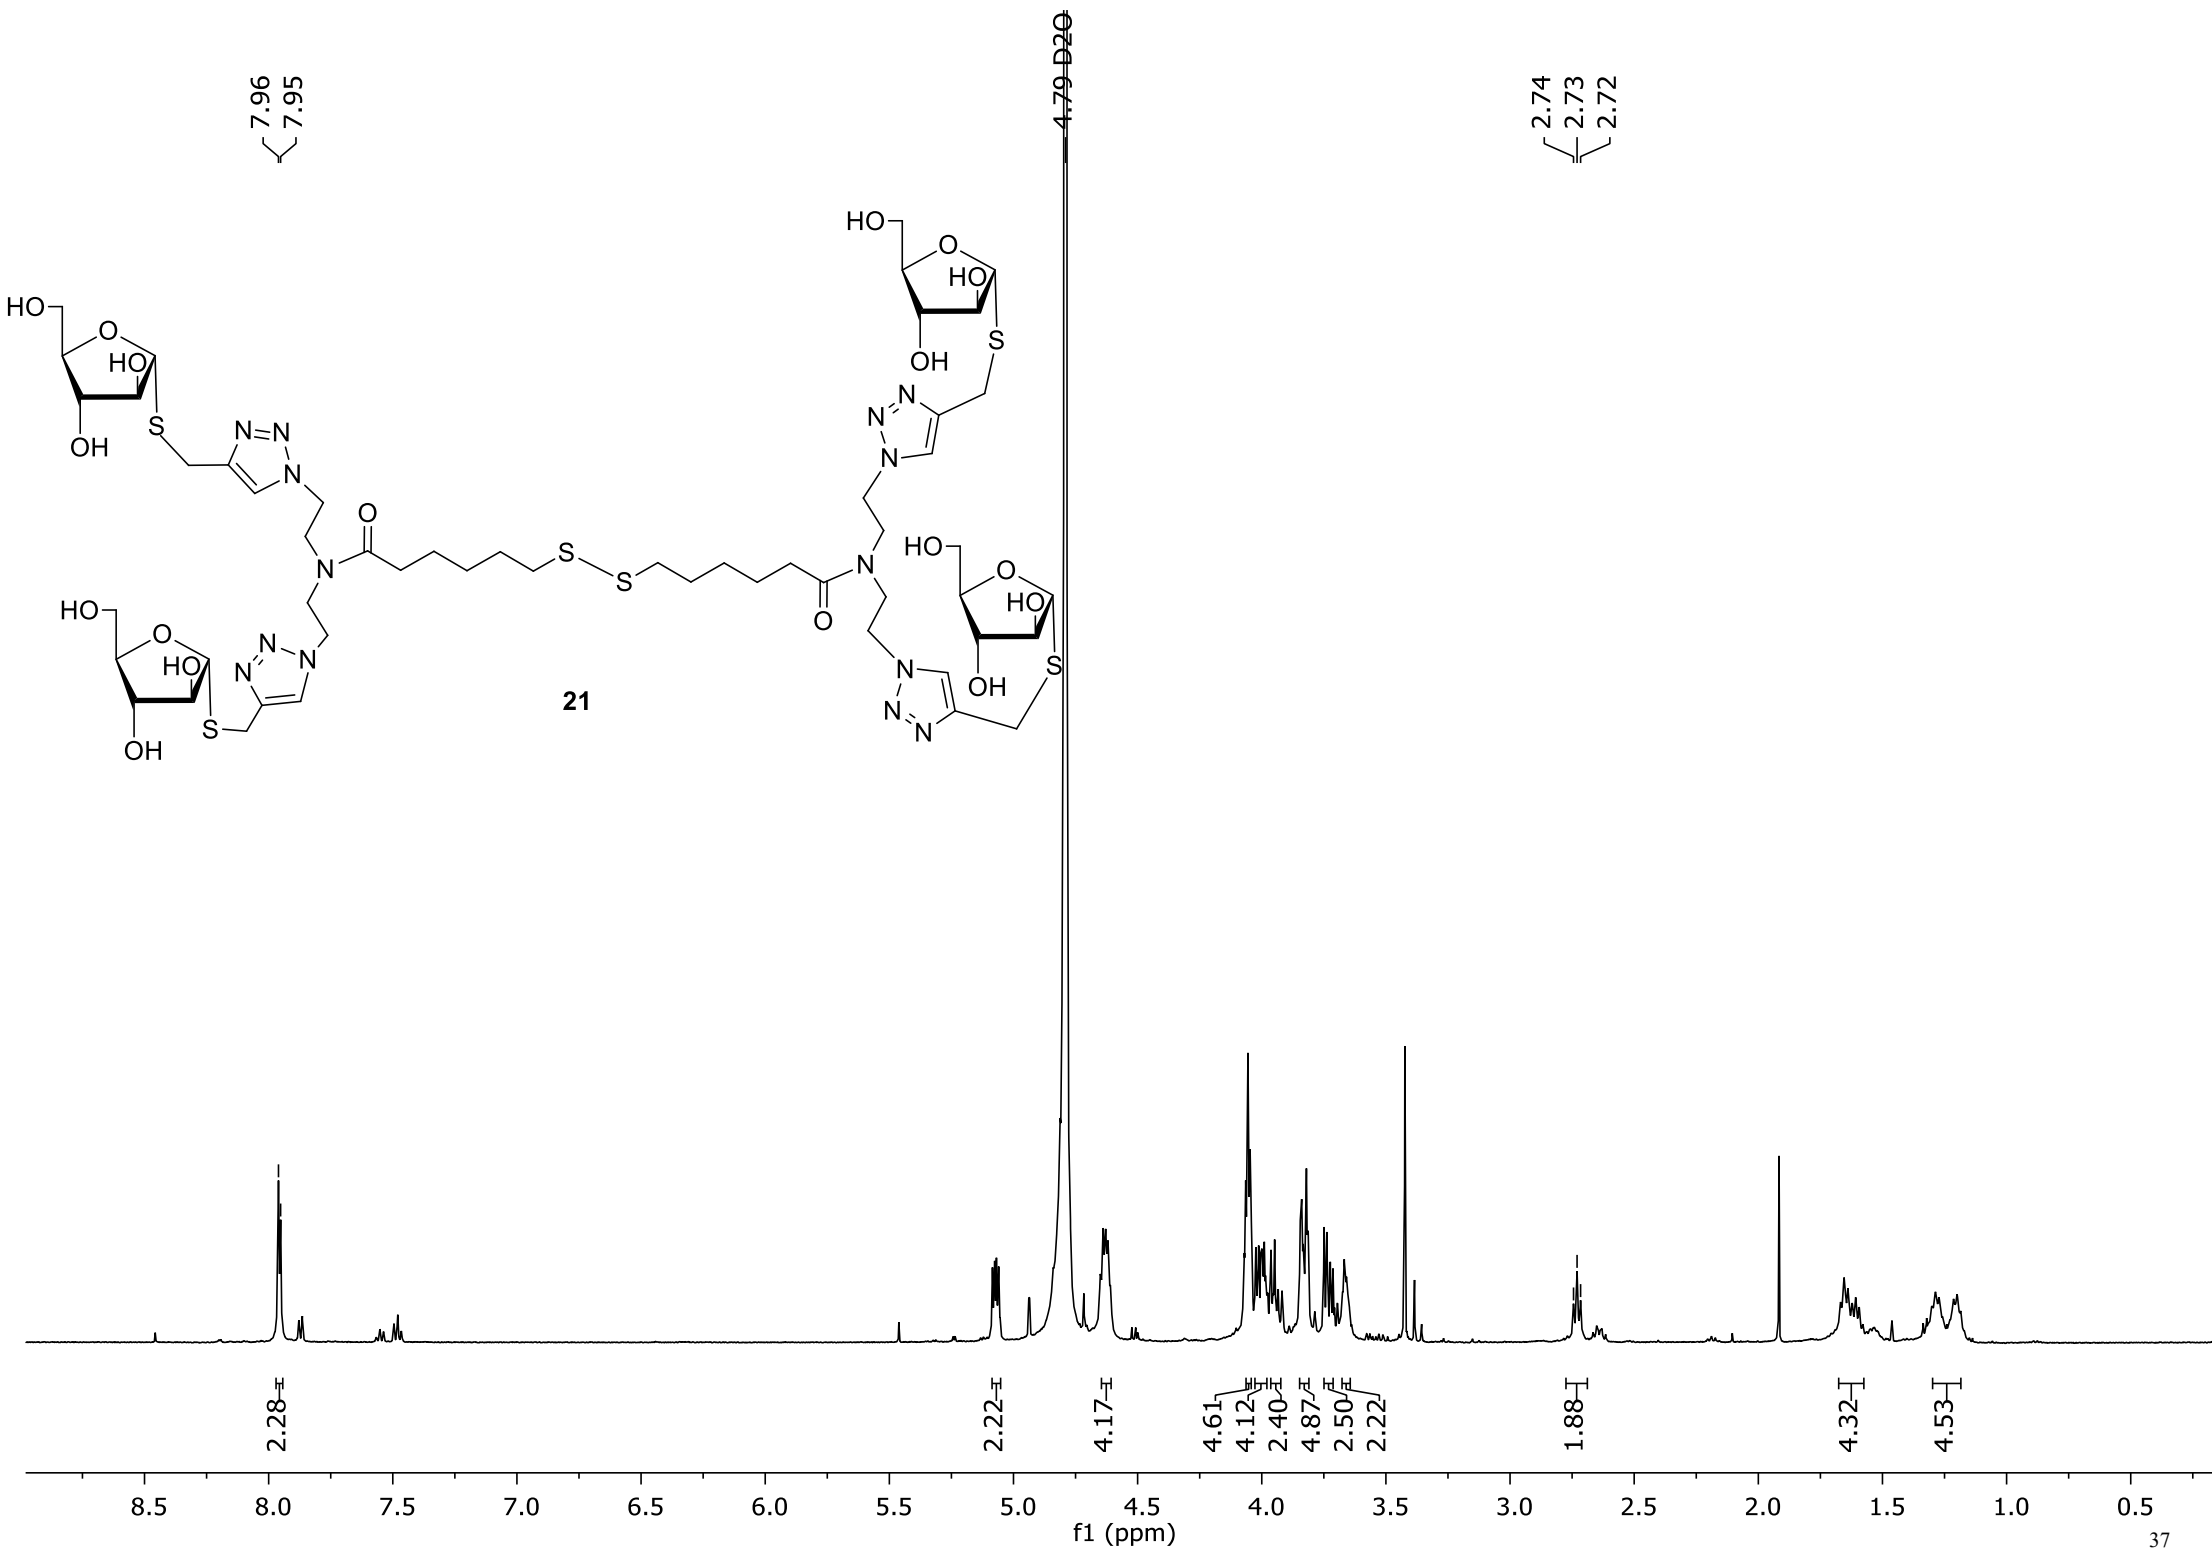

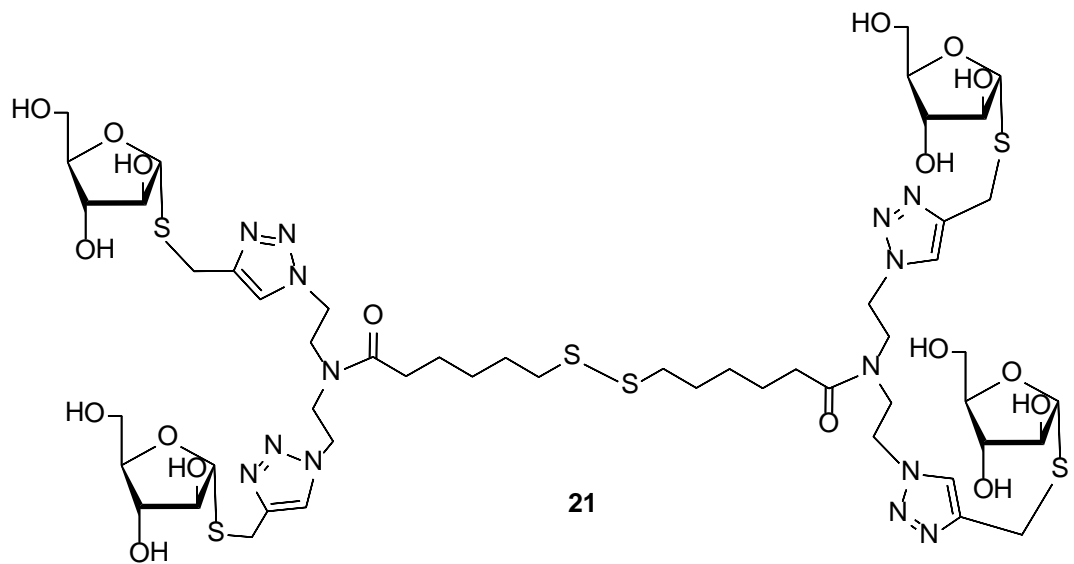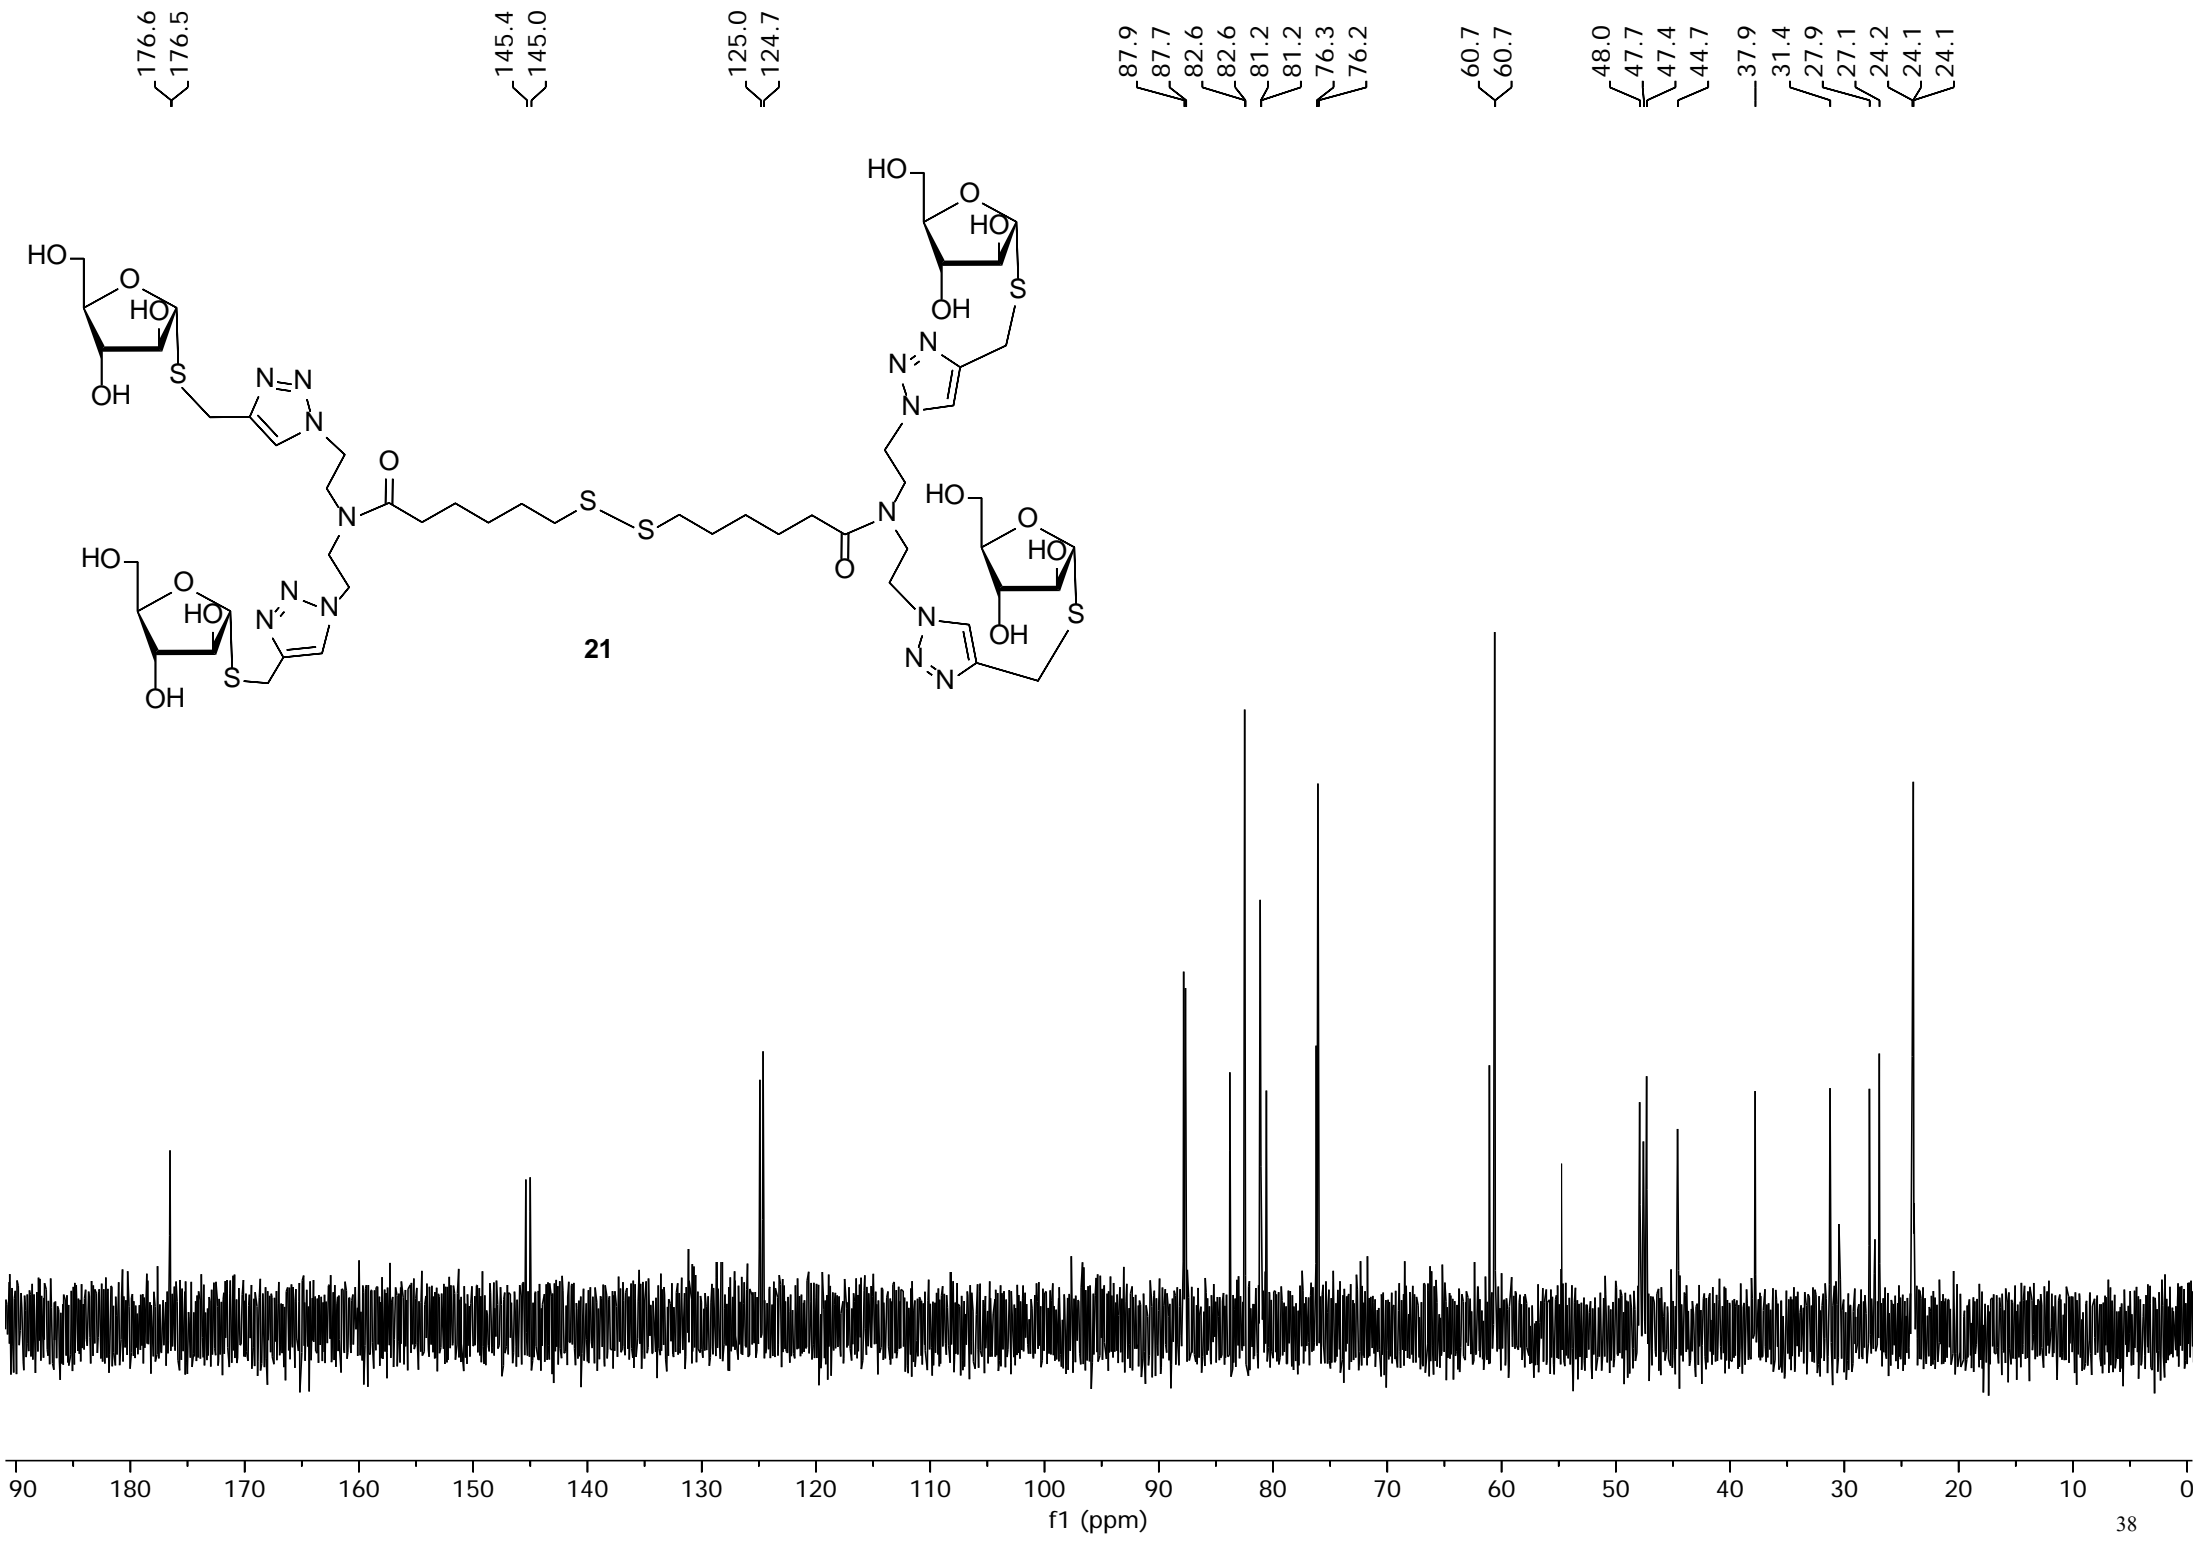

7.98  
7.97

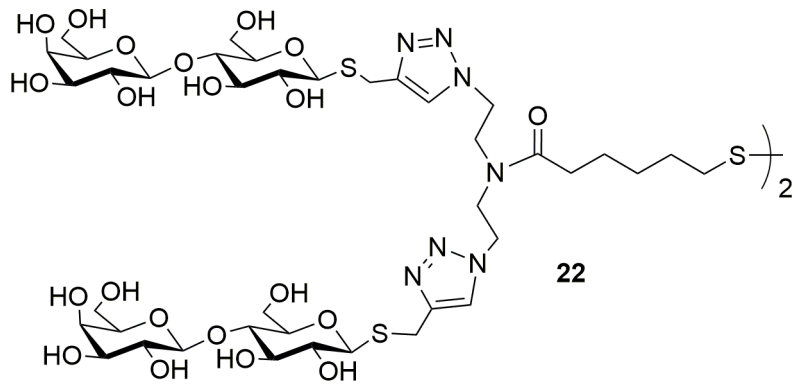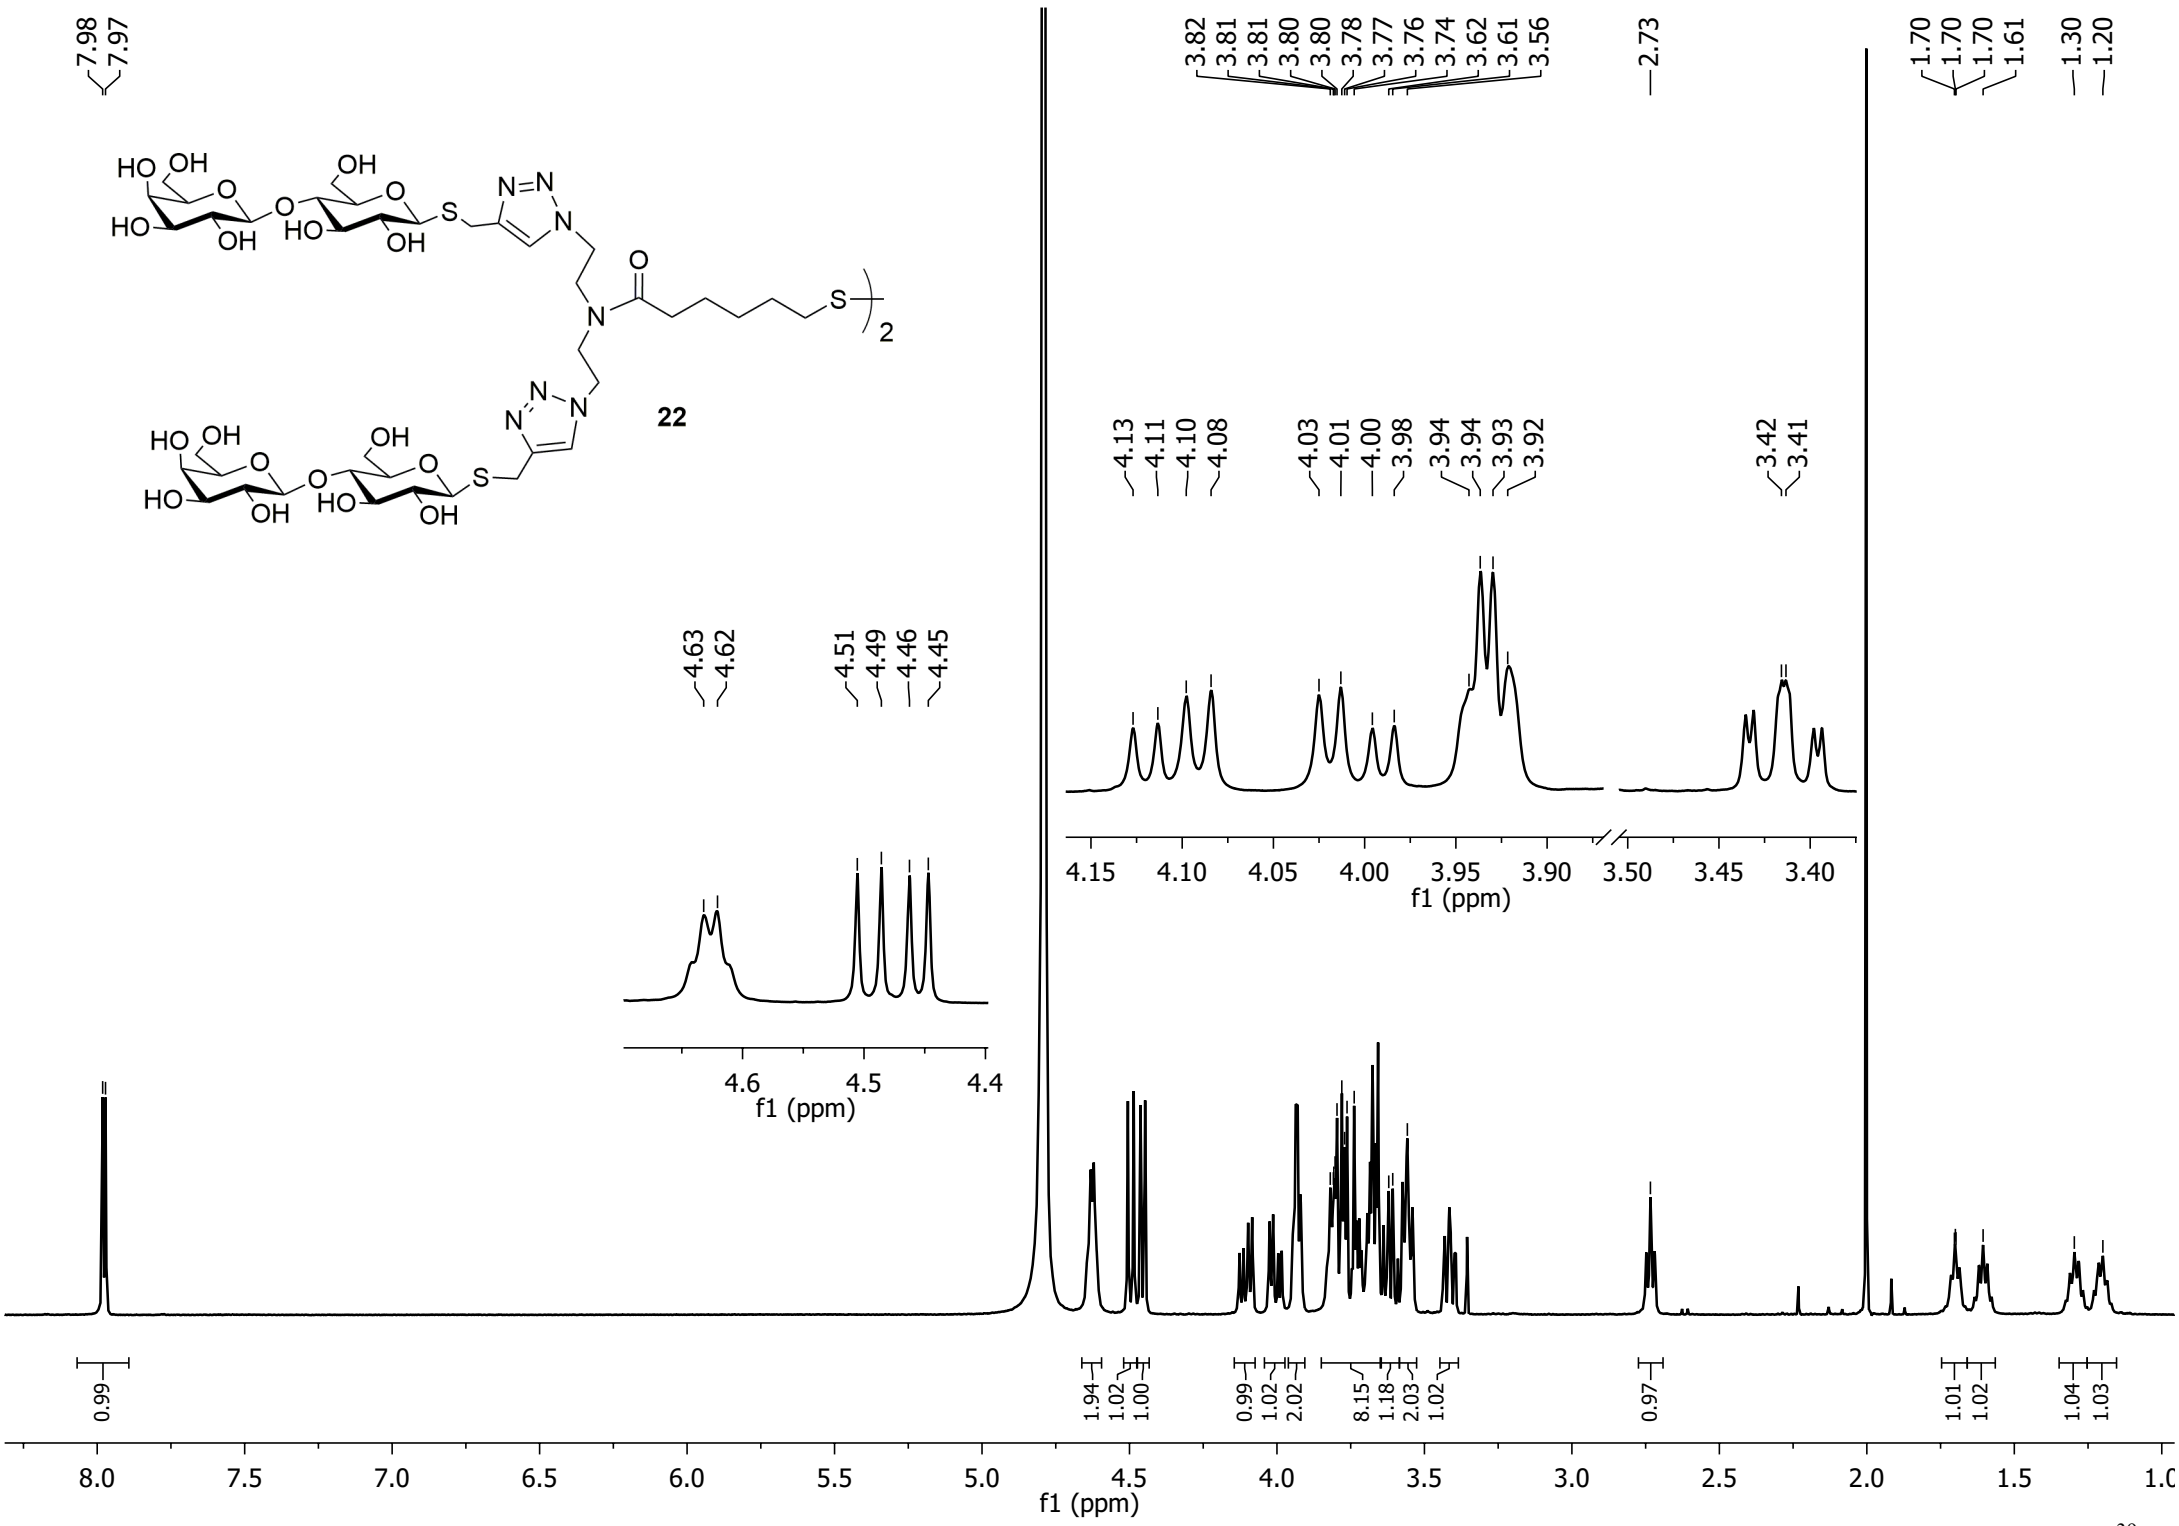

—176.5

145.5  
145.2

125.1  
124.7

—102.9

84.6  
84.5  
78.7  
78.6  
78.1  
75.7  
75.7  
75.3  
72.5  
71.9  
70.9  
68.5  
61.0  
60.2

48.1  
47.7  
47.4  
44.7

—37.9

31.4  
27.9  
27.0  
24.1  
23.4  
23.4

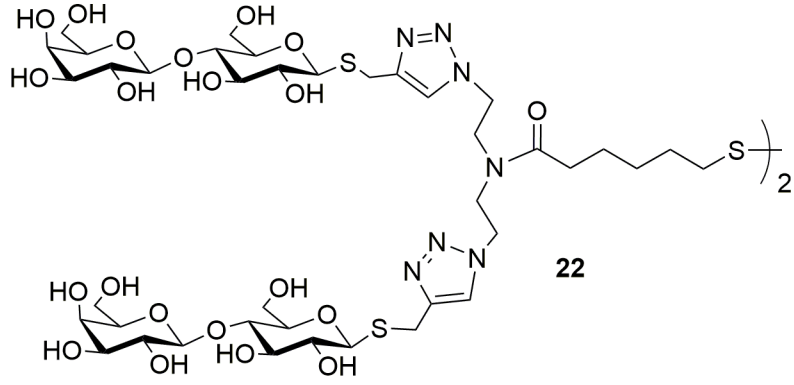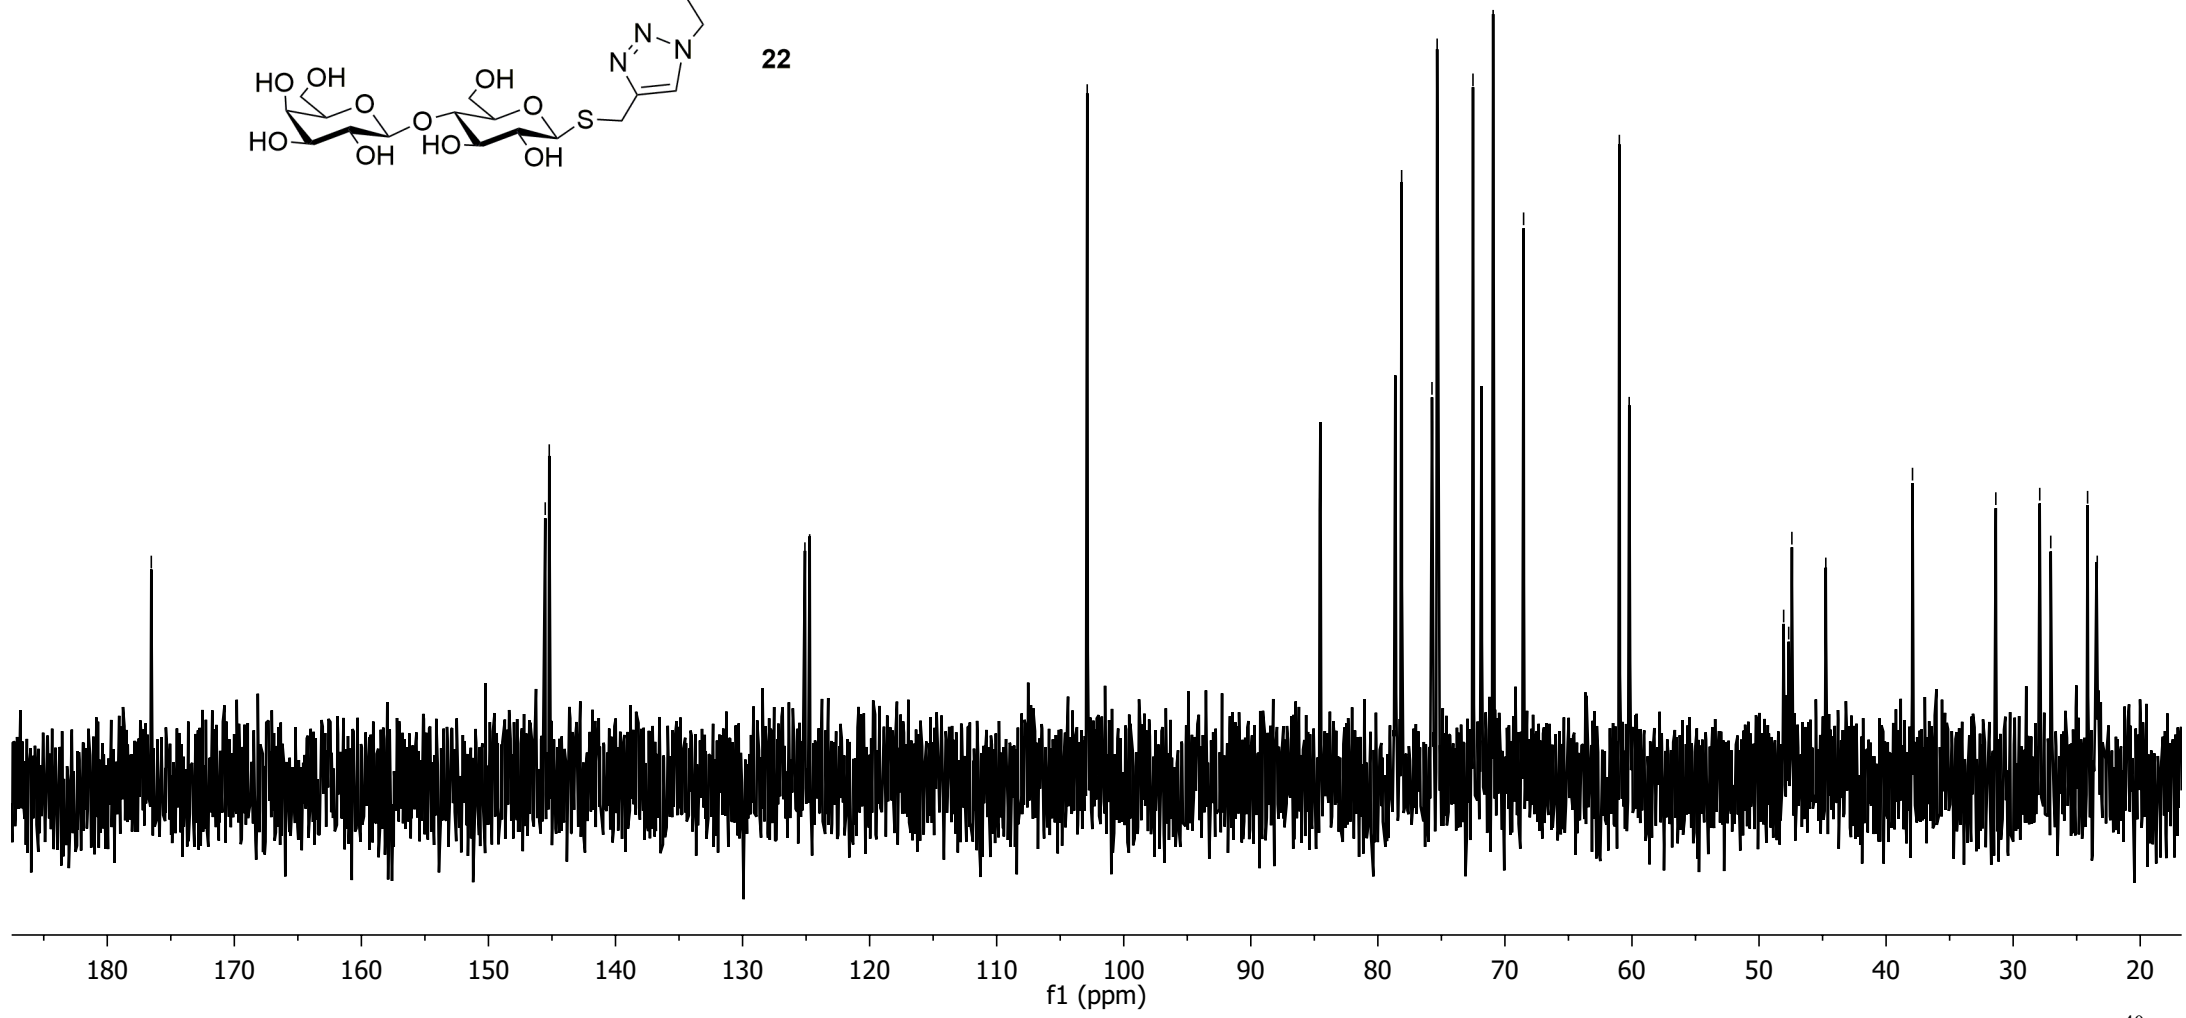



7.96  
7.95

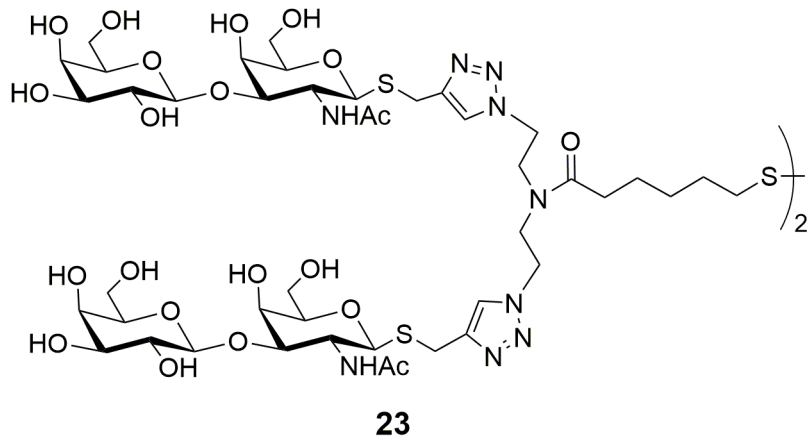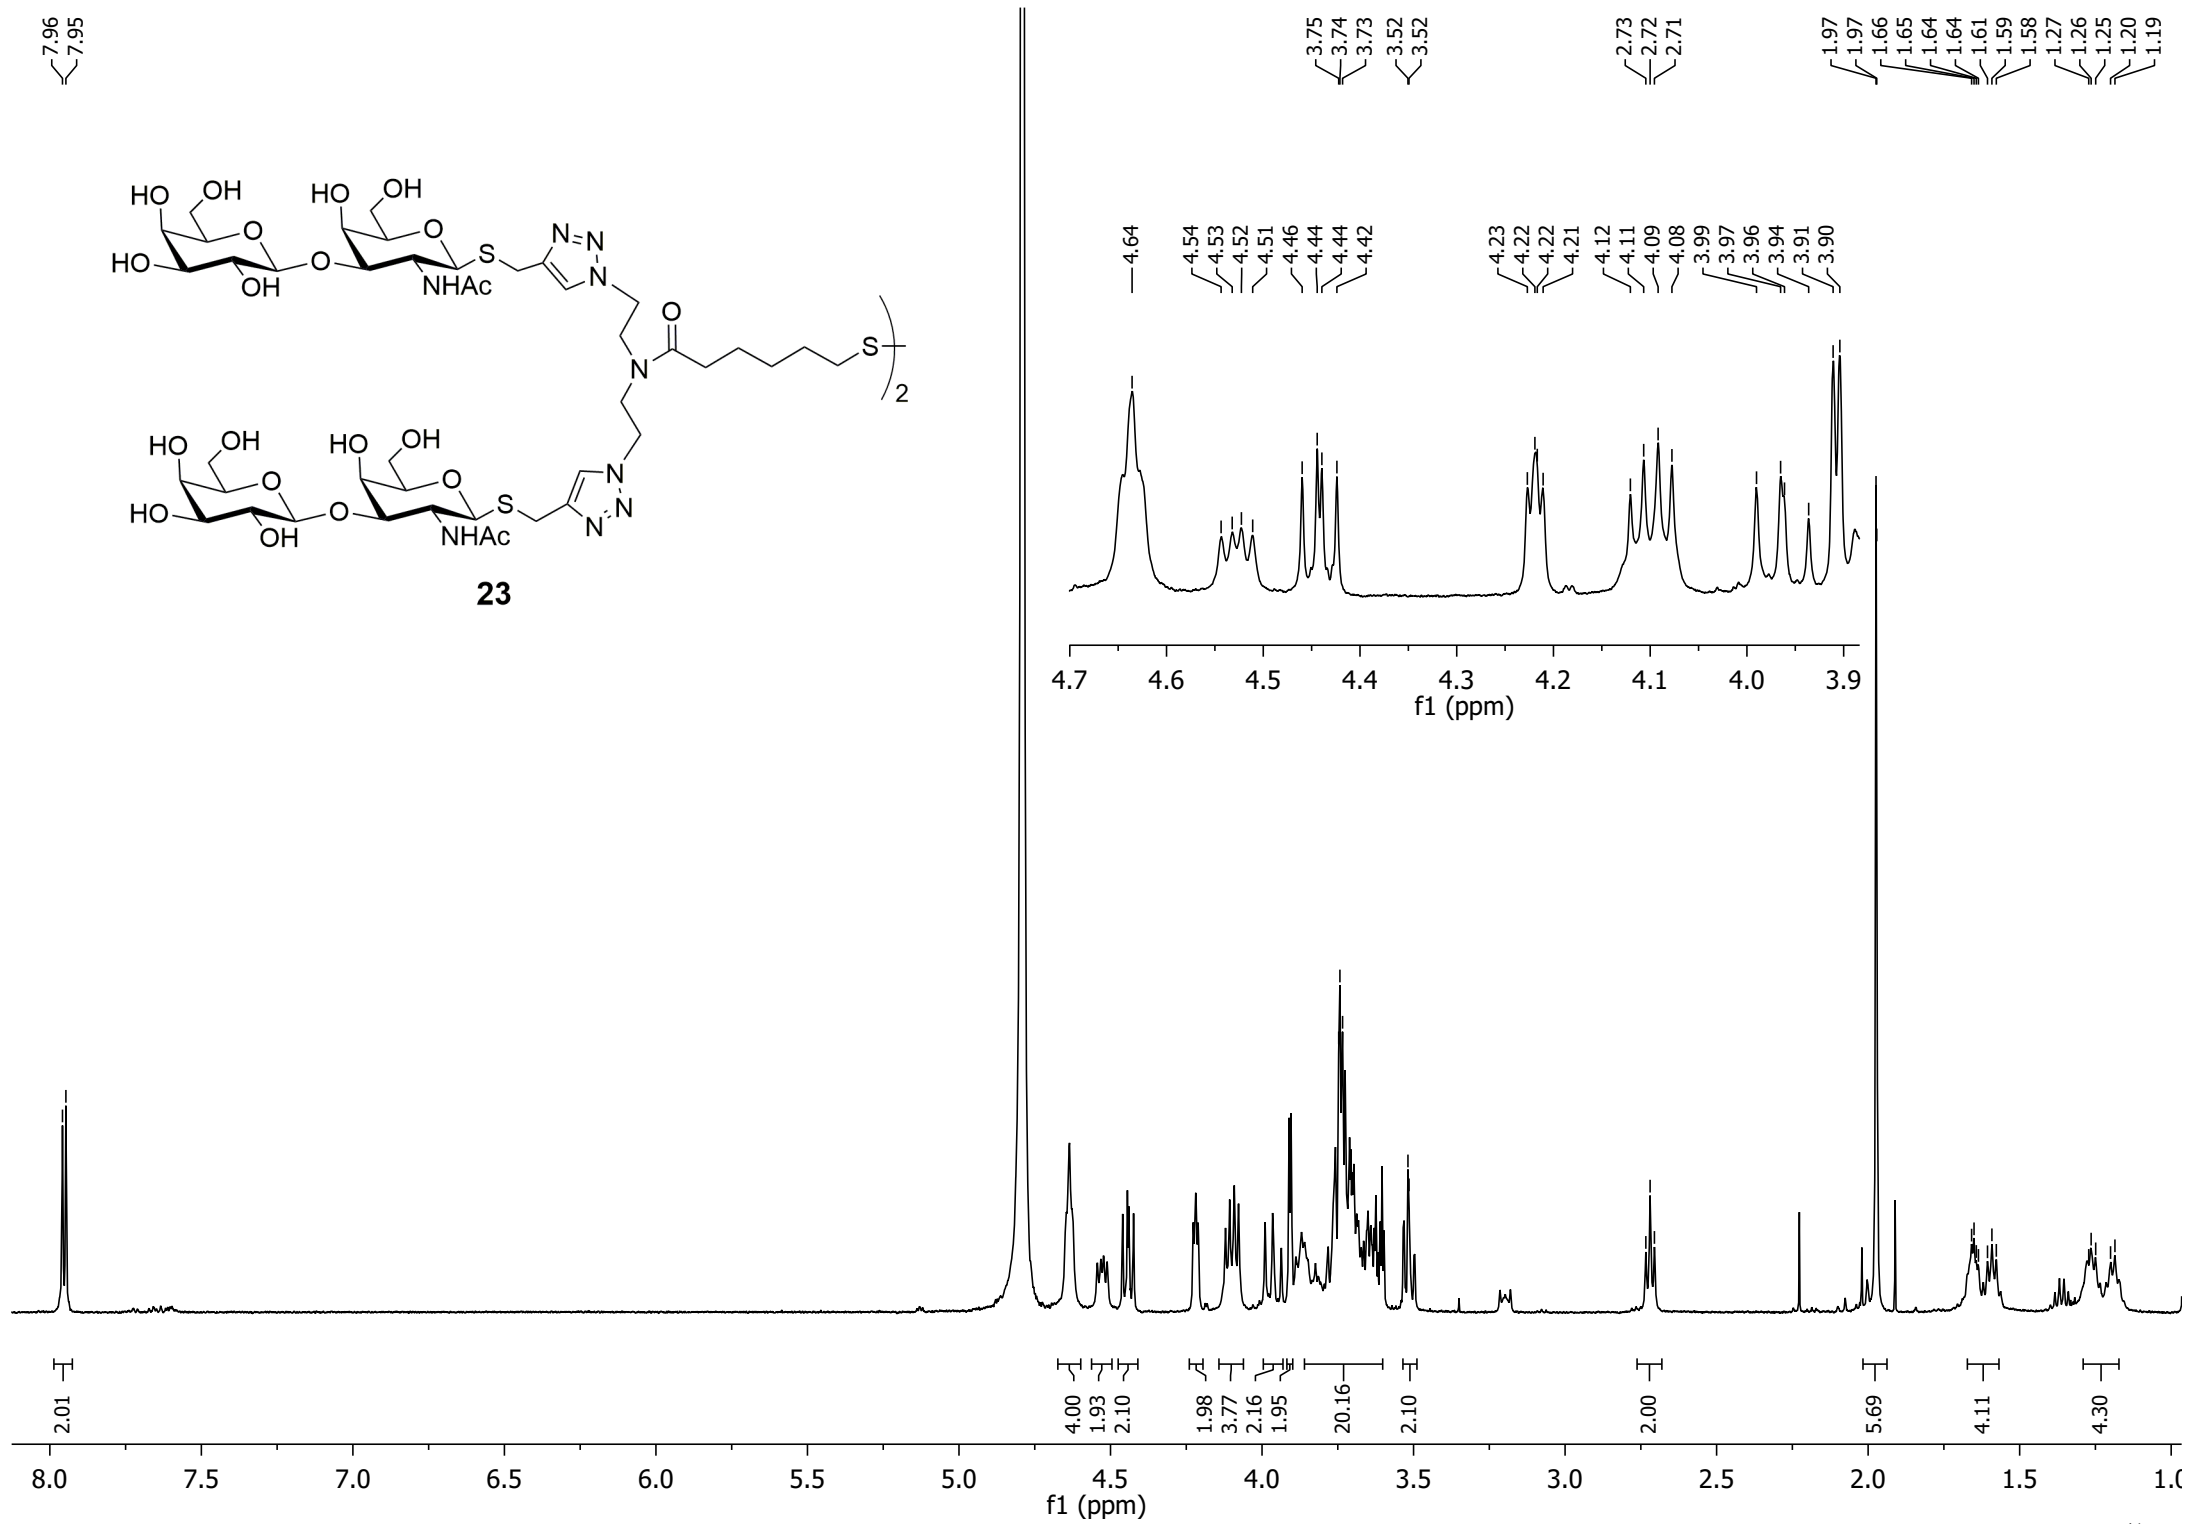



5.93

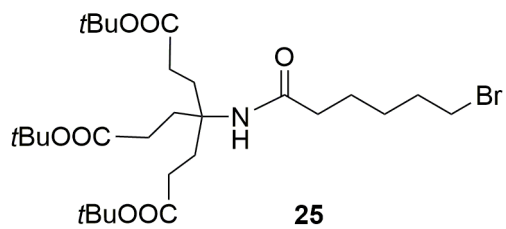

3.40  
3.38  
3.37

2.21  
2.20  
2.20  
2.19  
2.18  
2.11  
2.10  
2.08  
1.96  
1.95  
1.95  
1.95  
1.93  
1.88  
1.86  
1.86  
1.85  
1.83  
1.82  
1.61

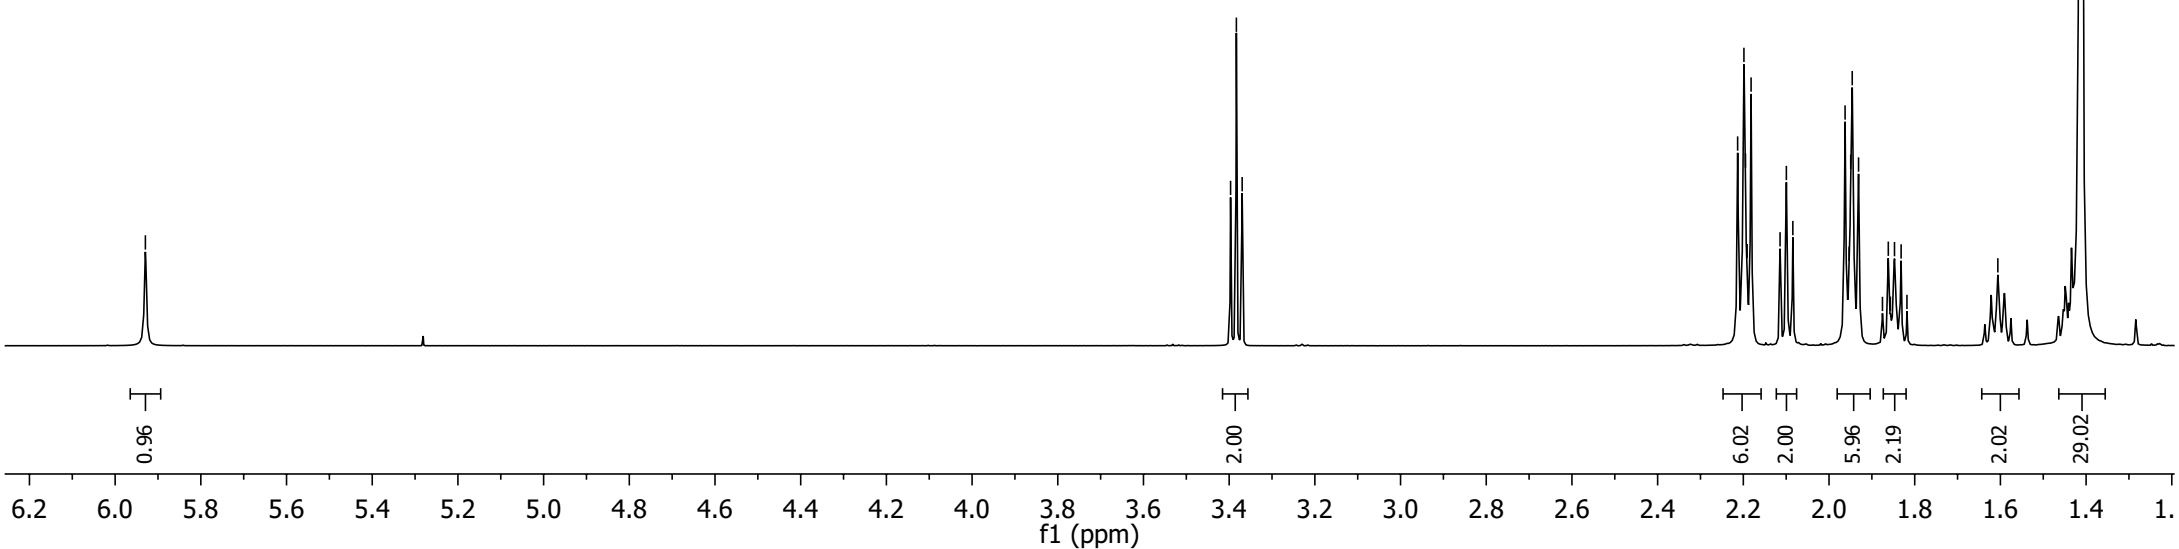

173.0  
172.2

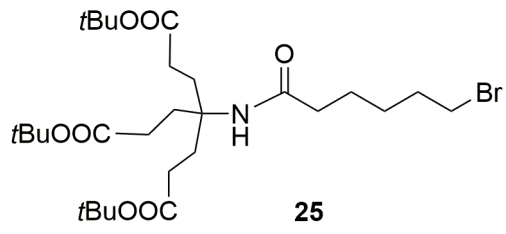

80.8

57.4

37.3  
33.7  
32.6  
30.1  
30.0  
28.2  
27.9  
24.9

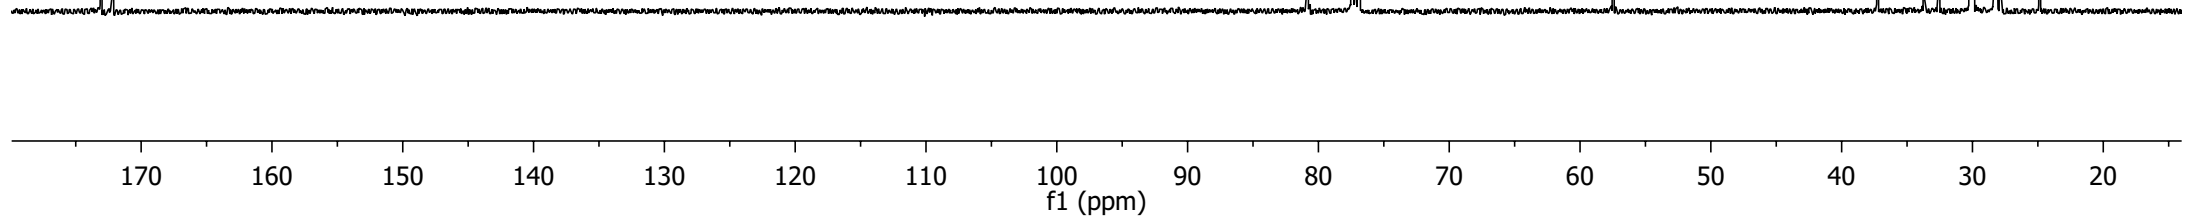

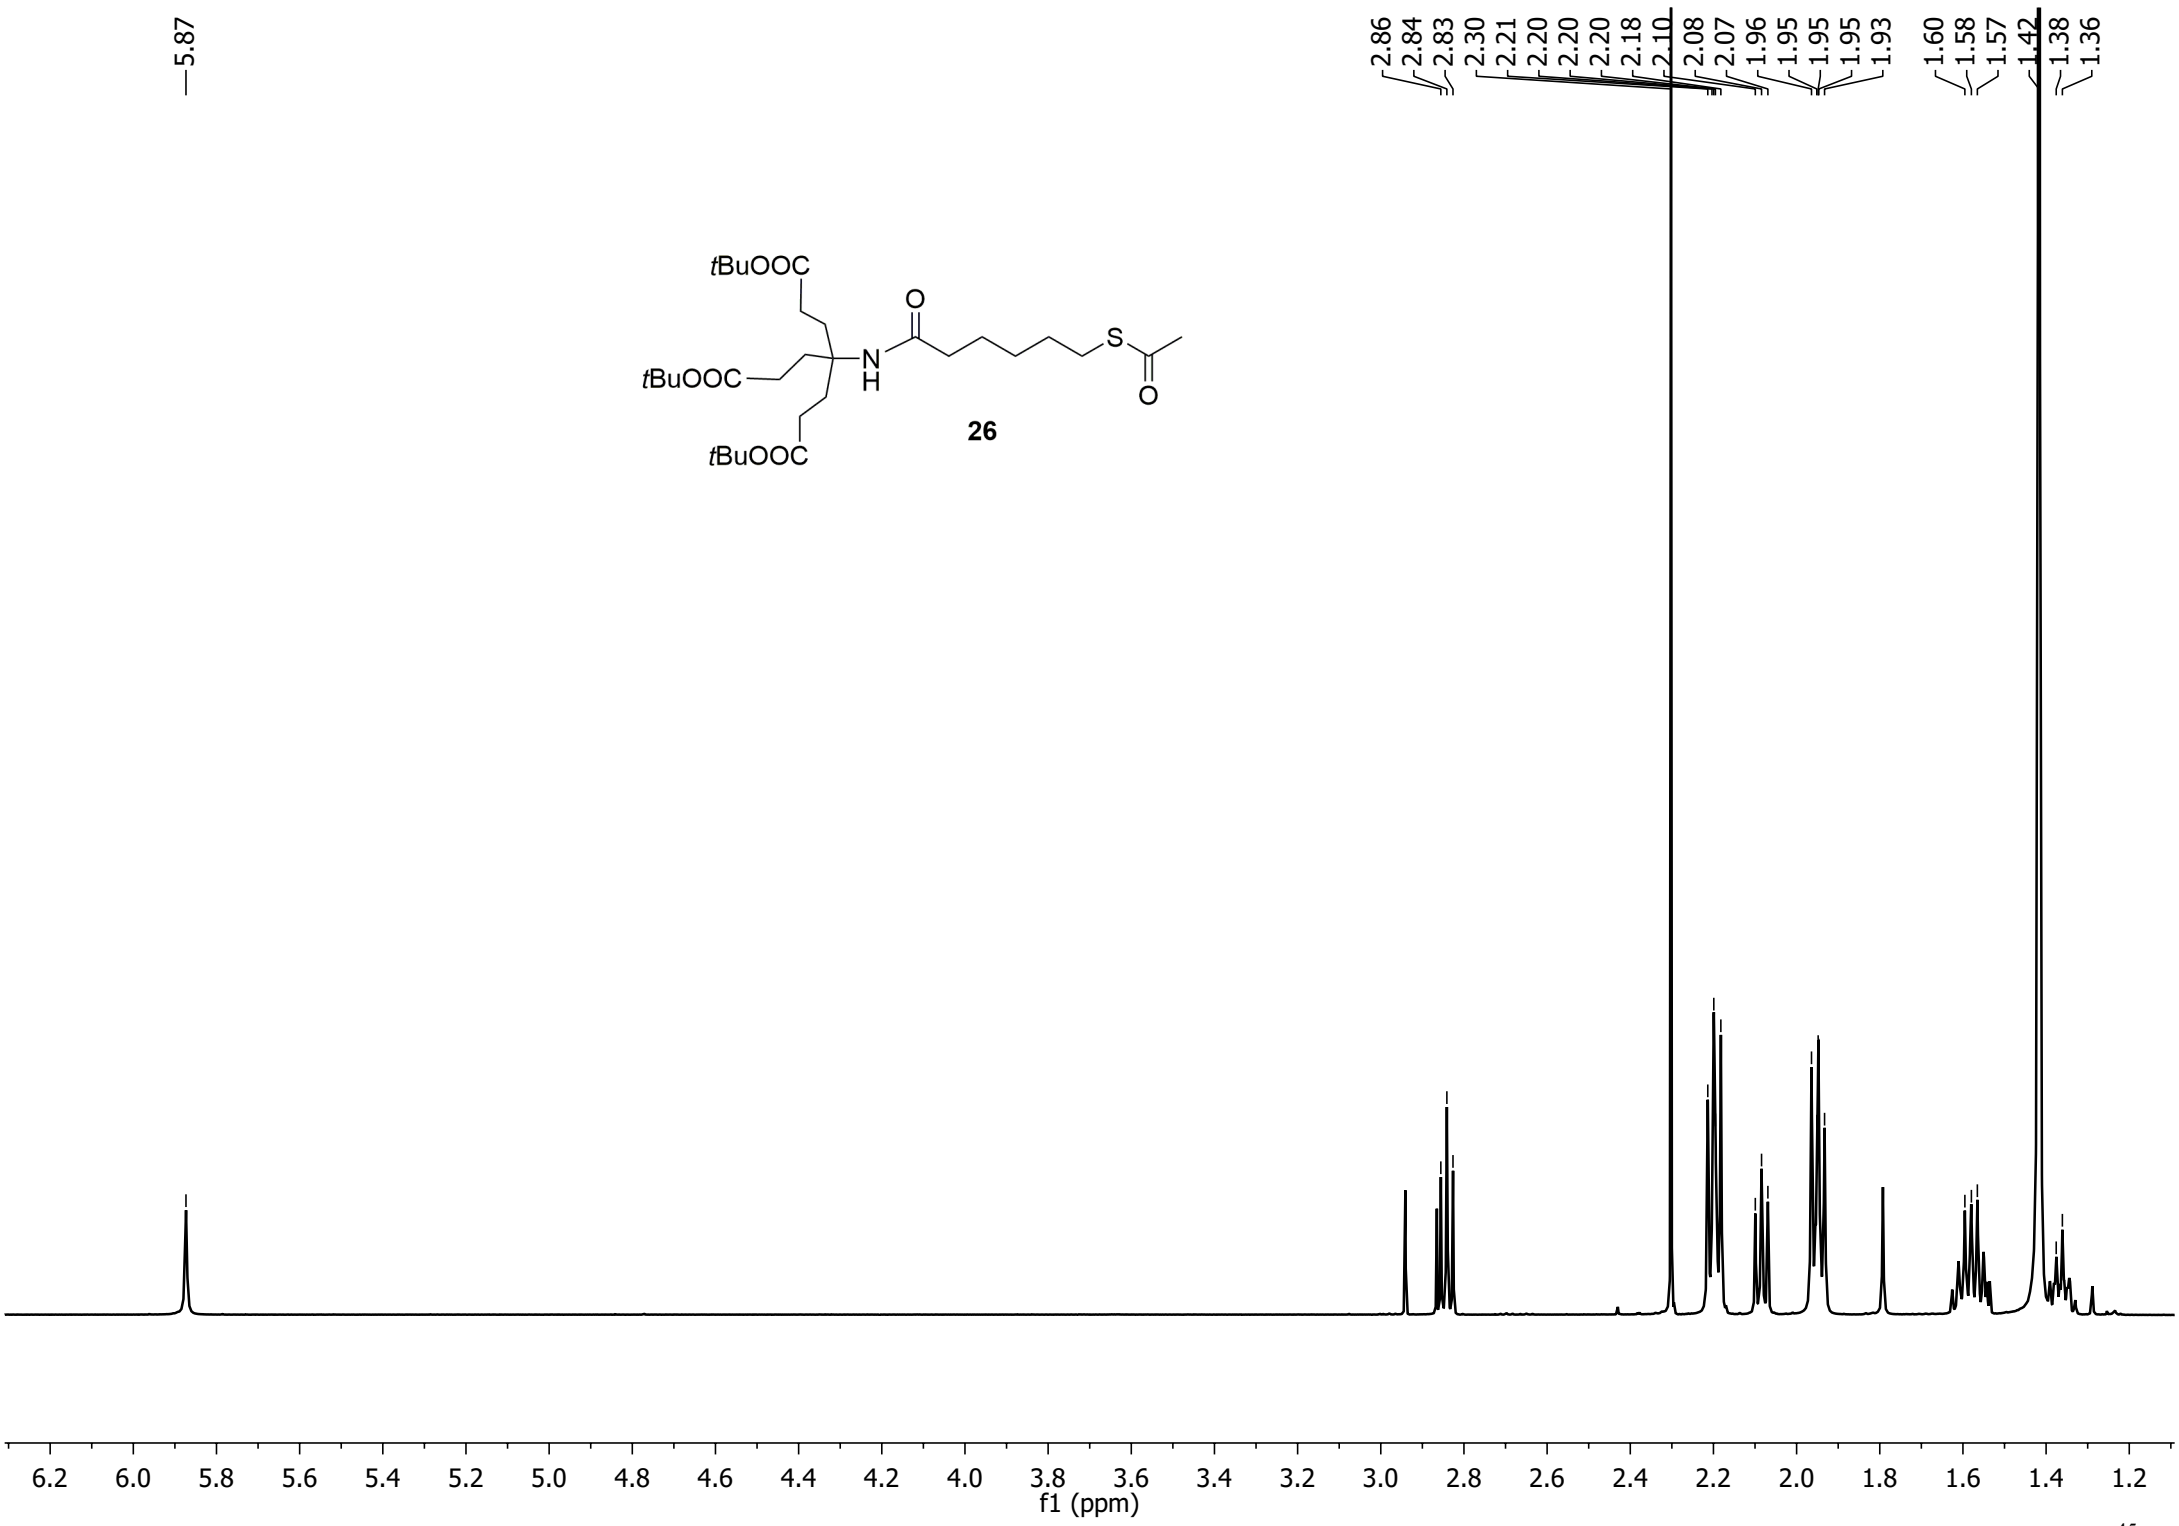

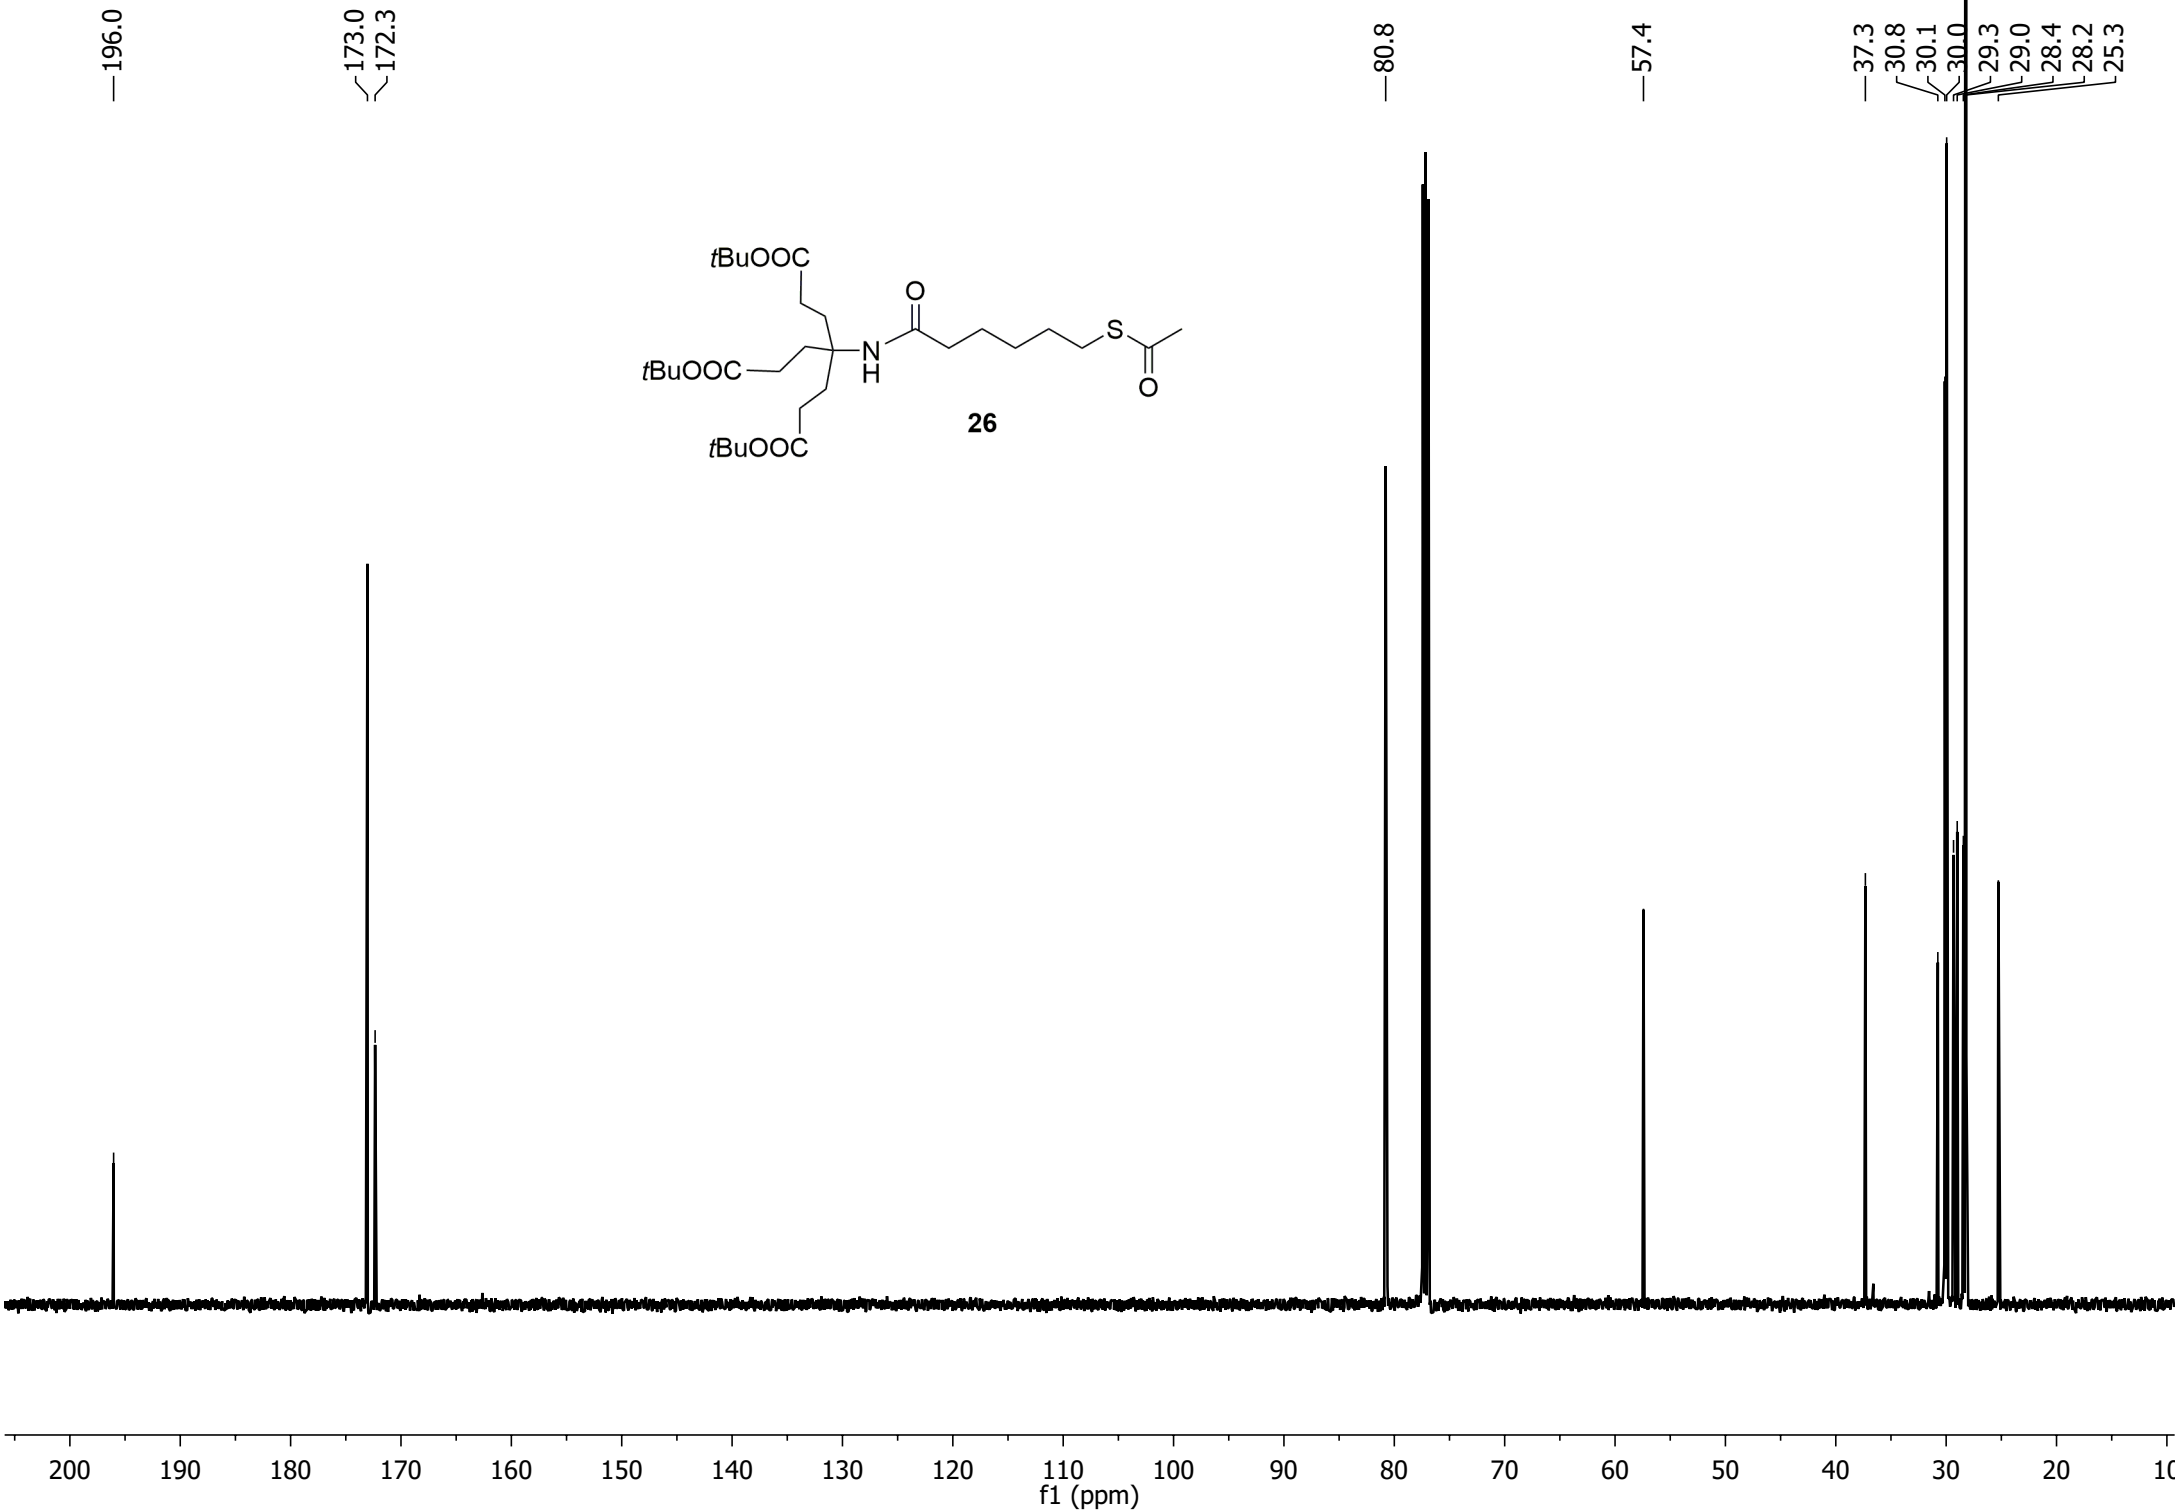

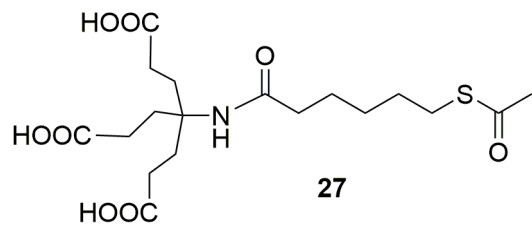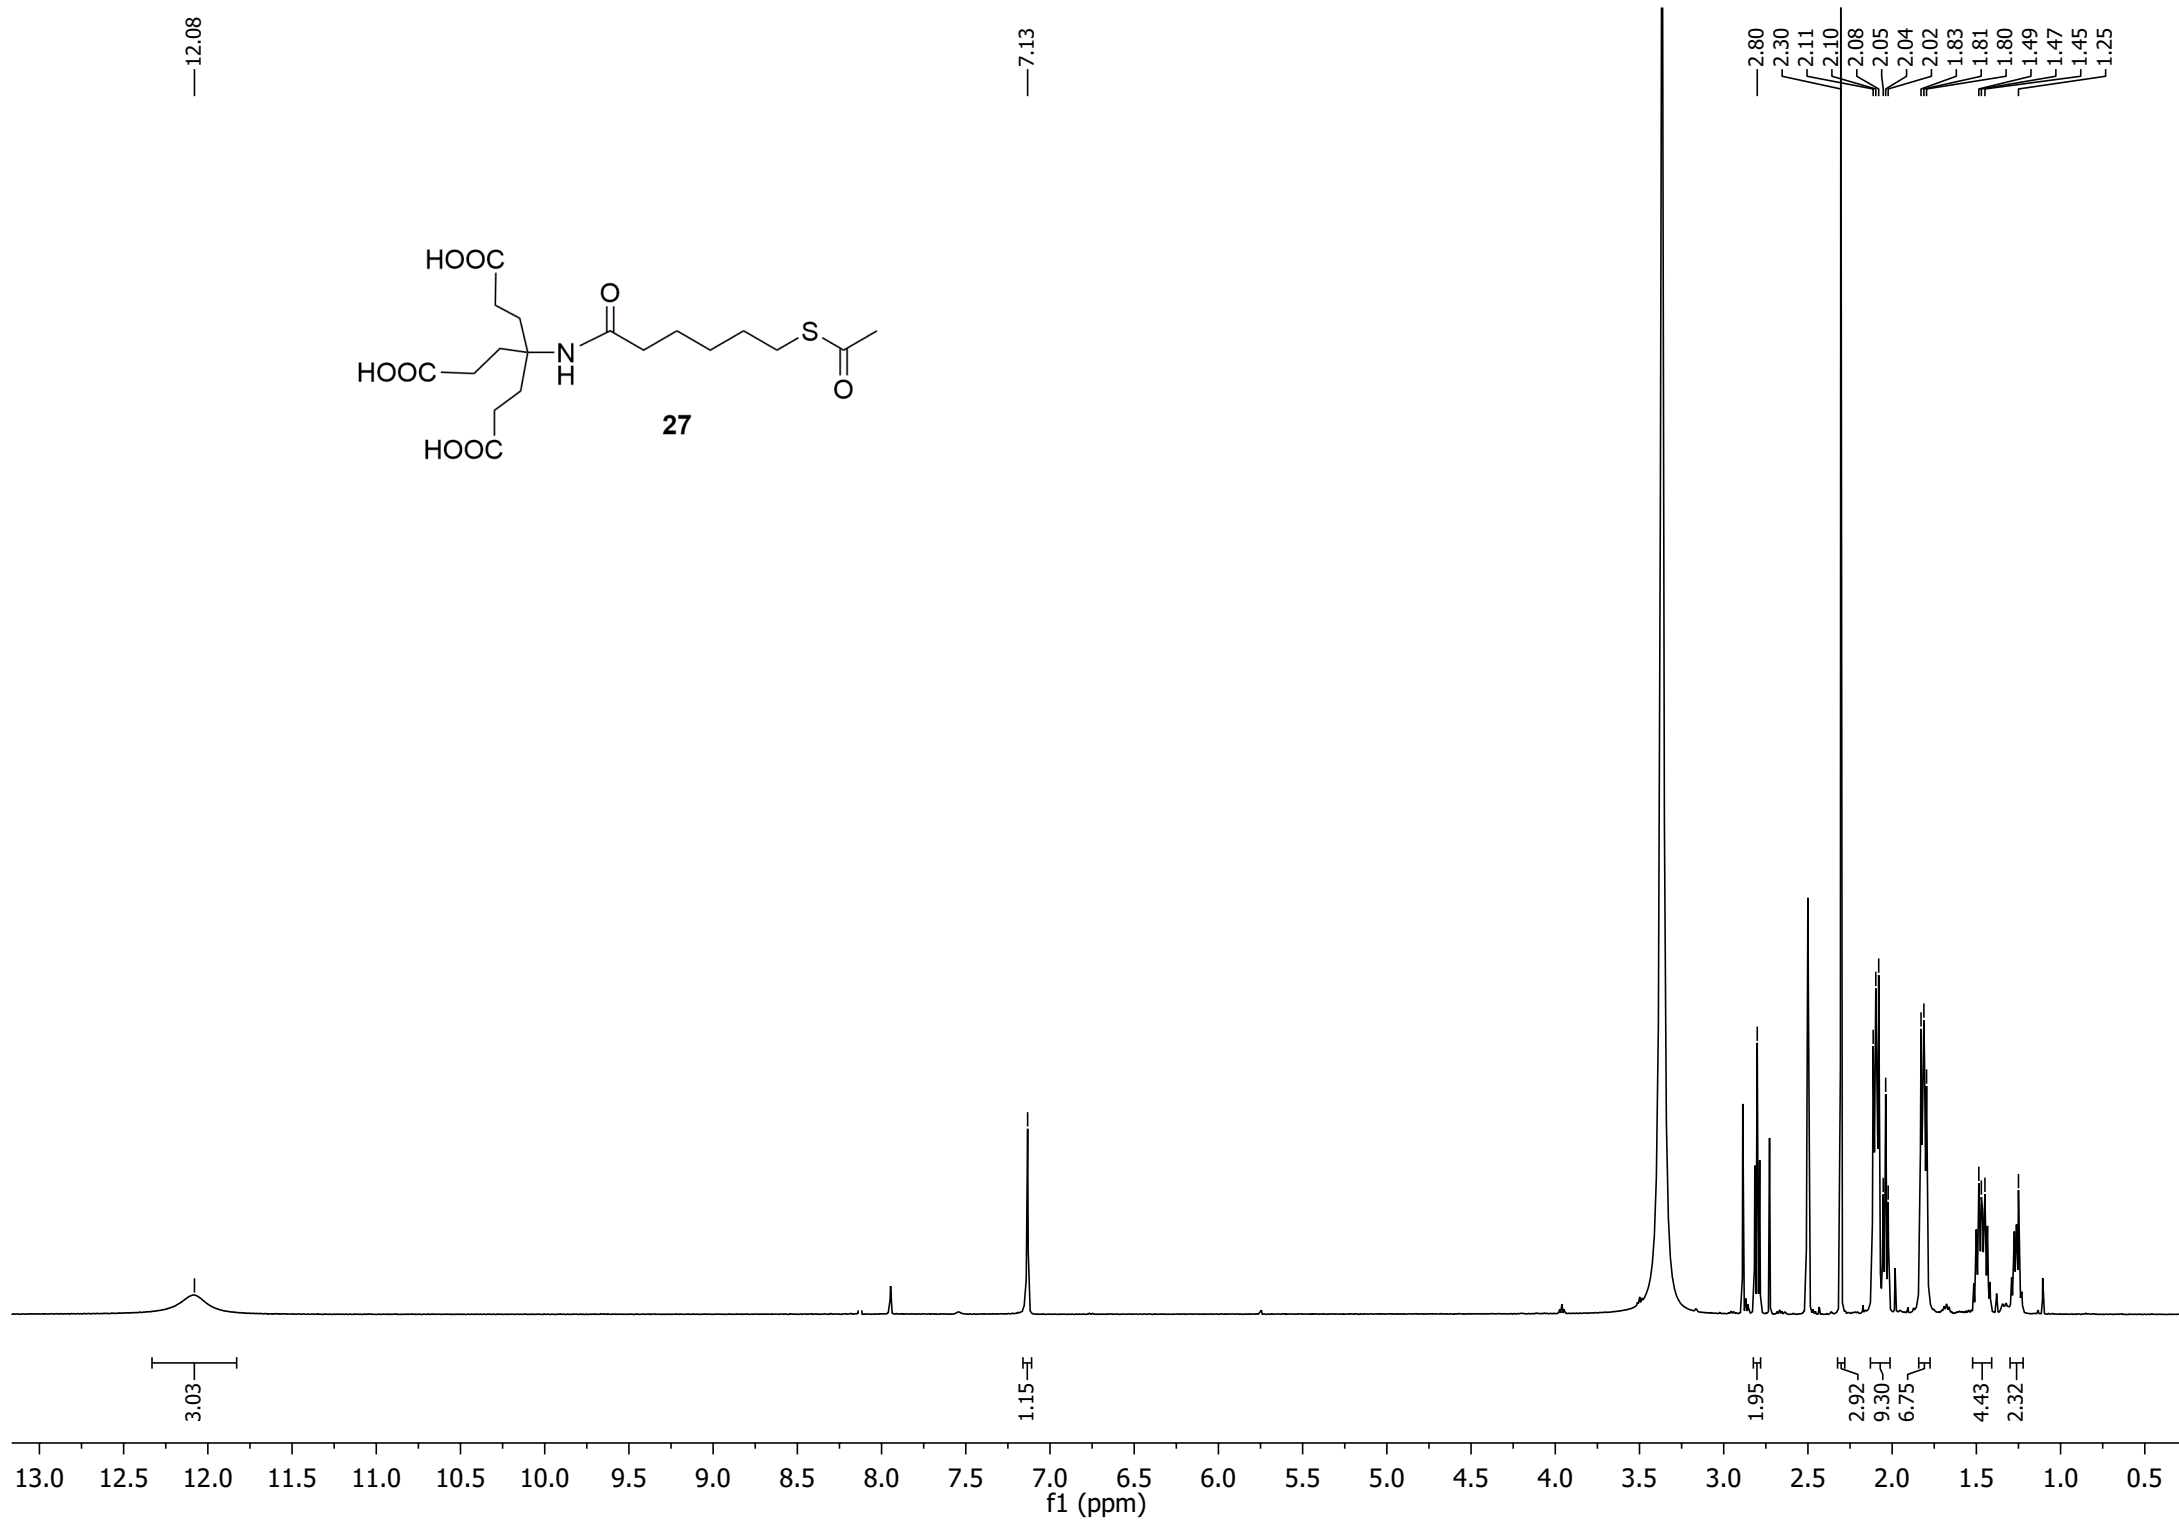

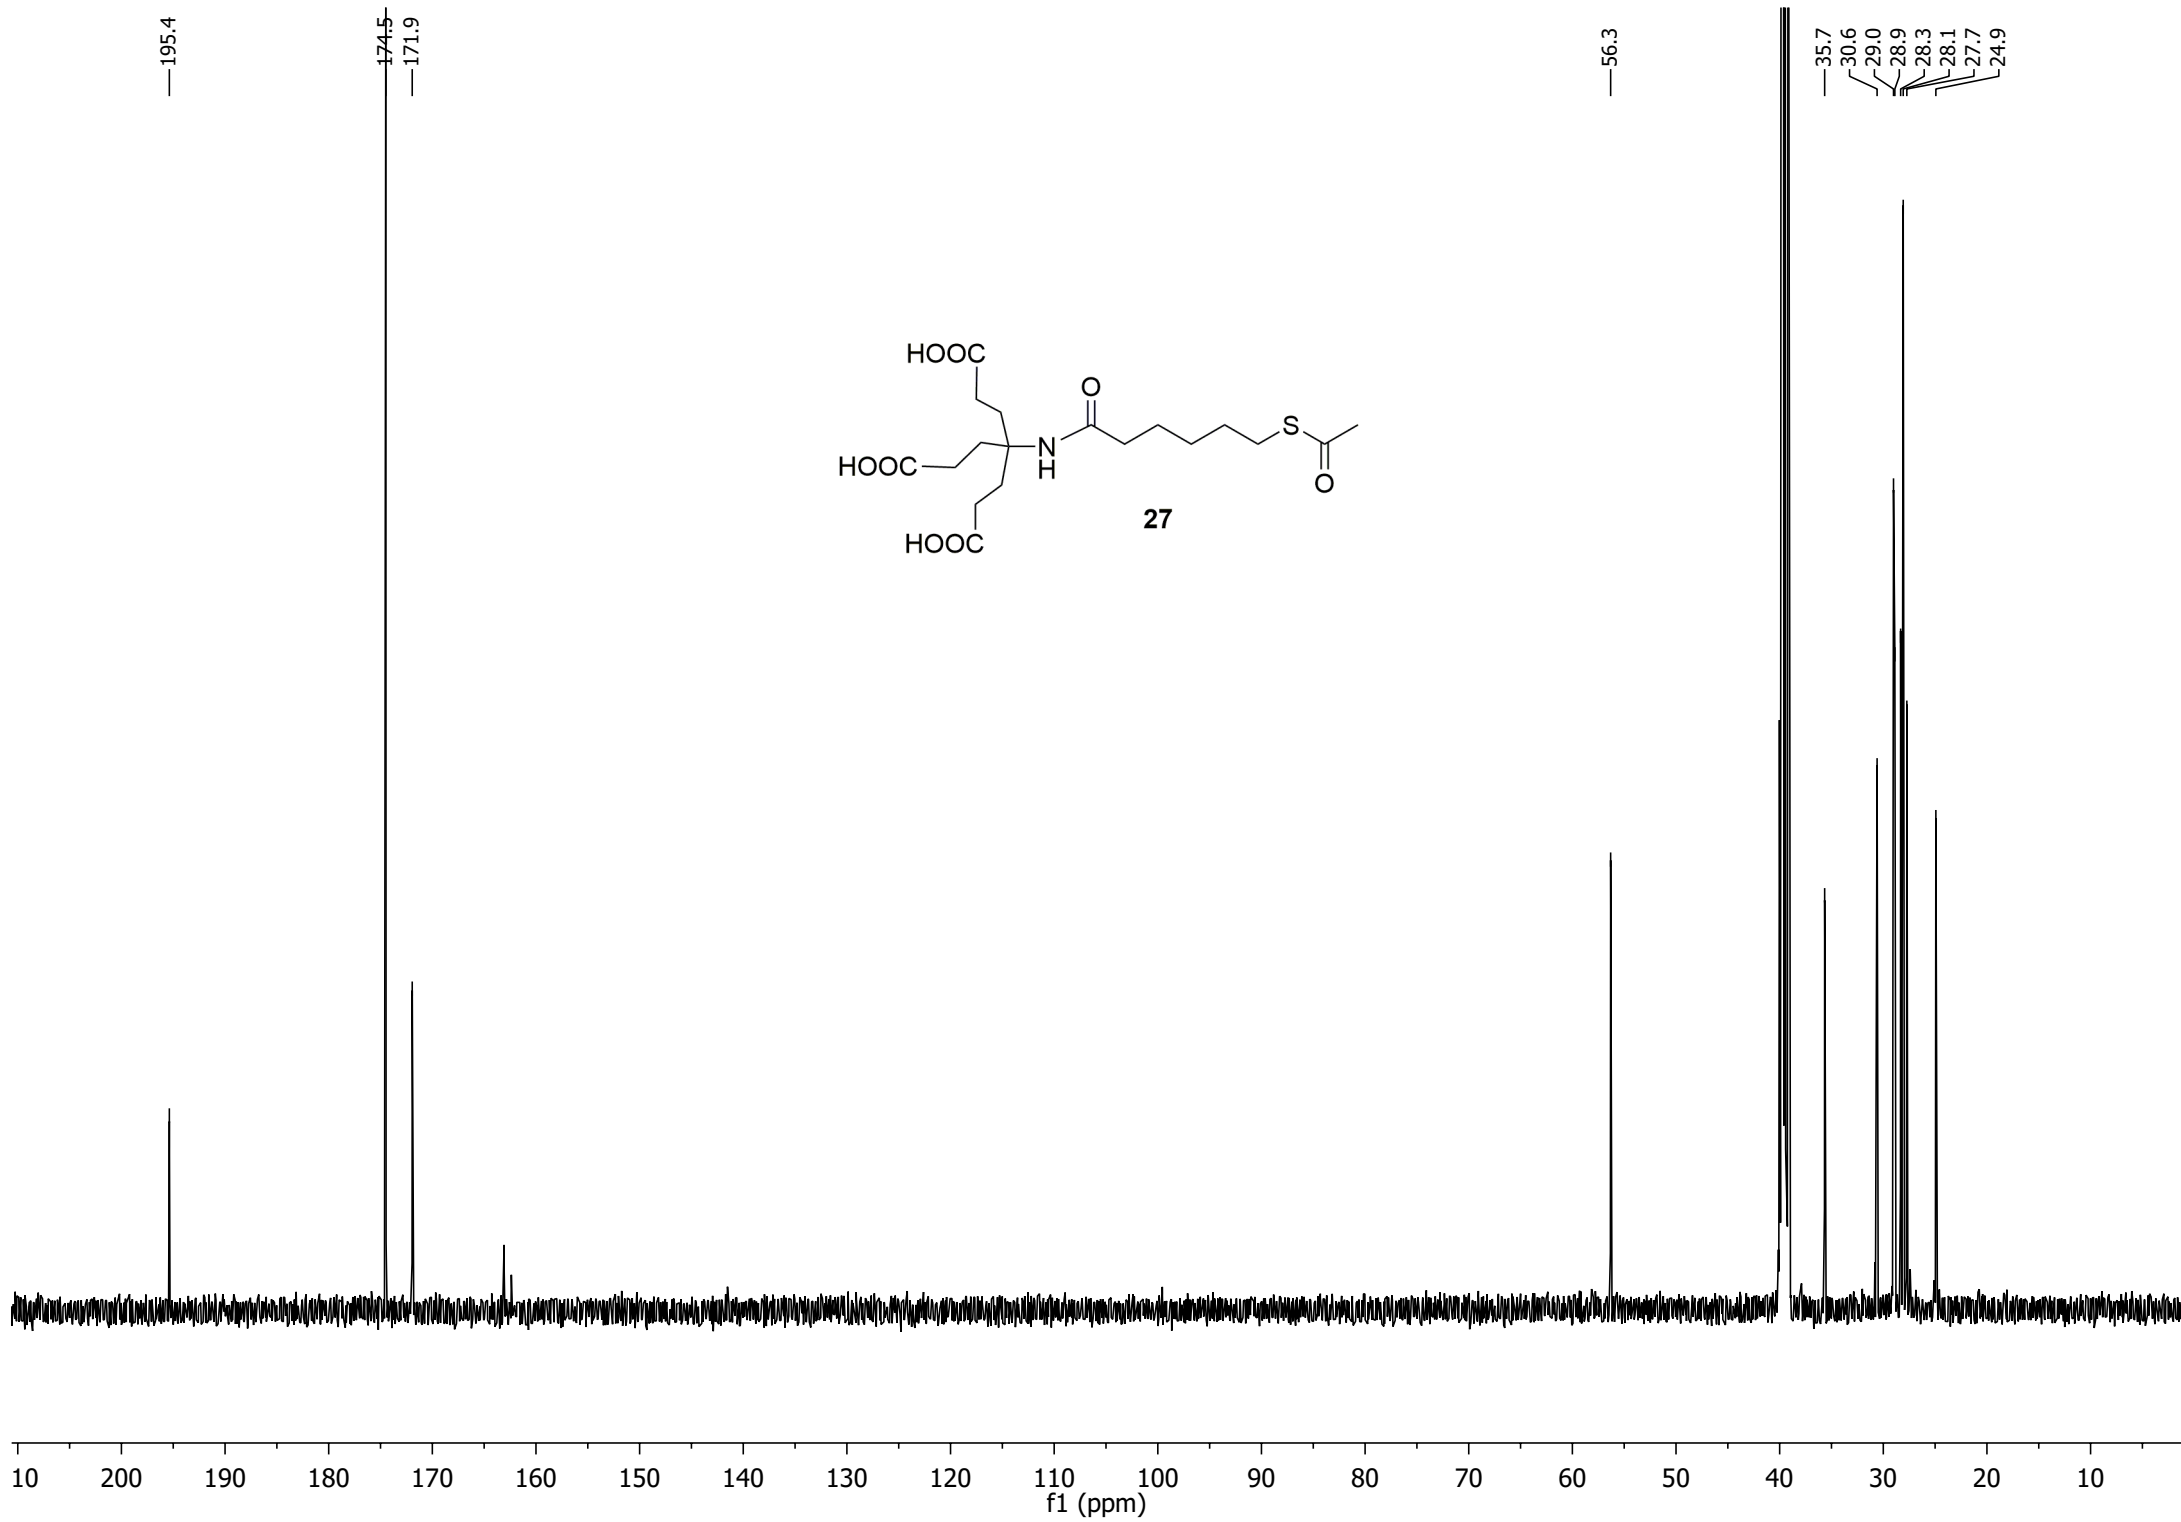



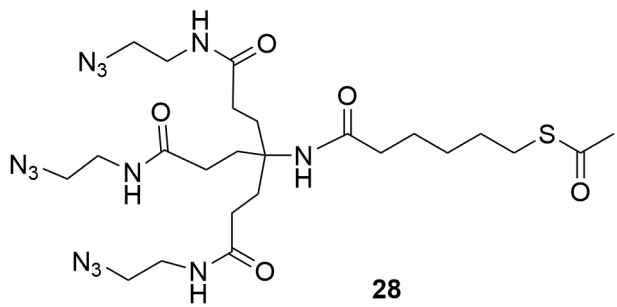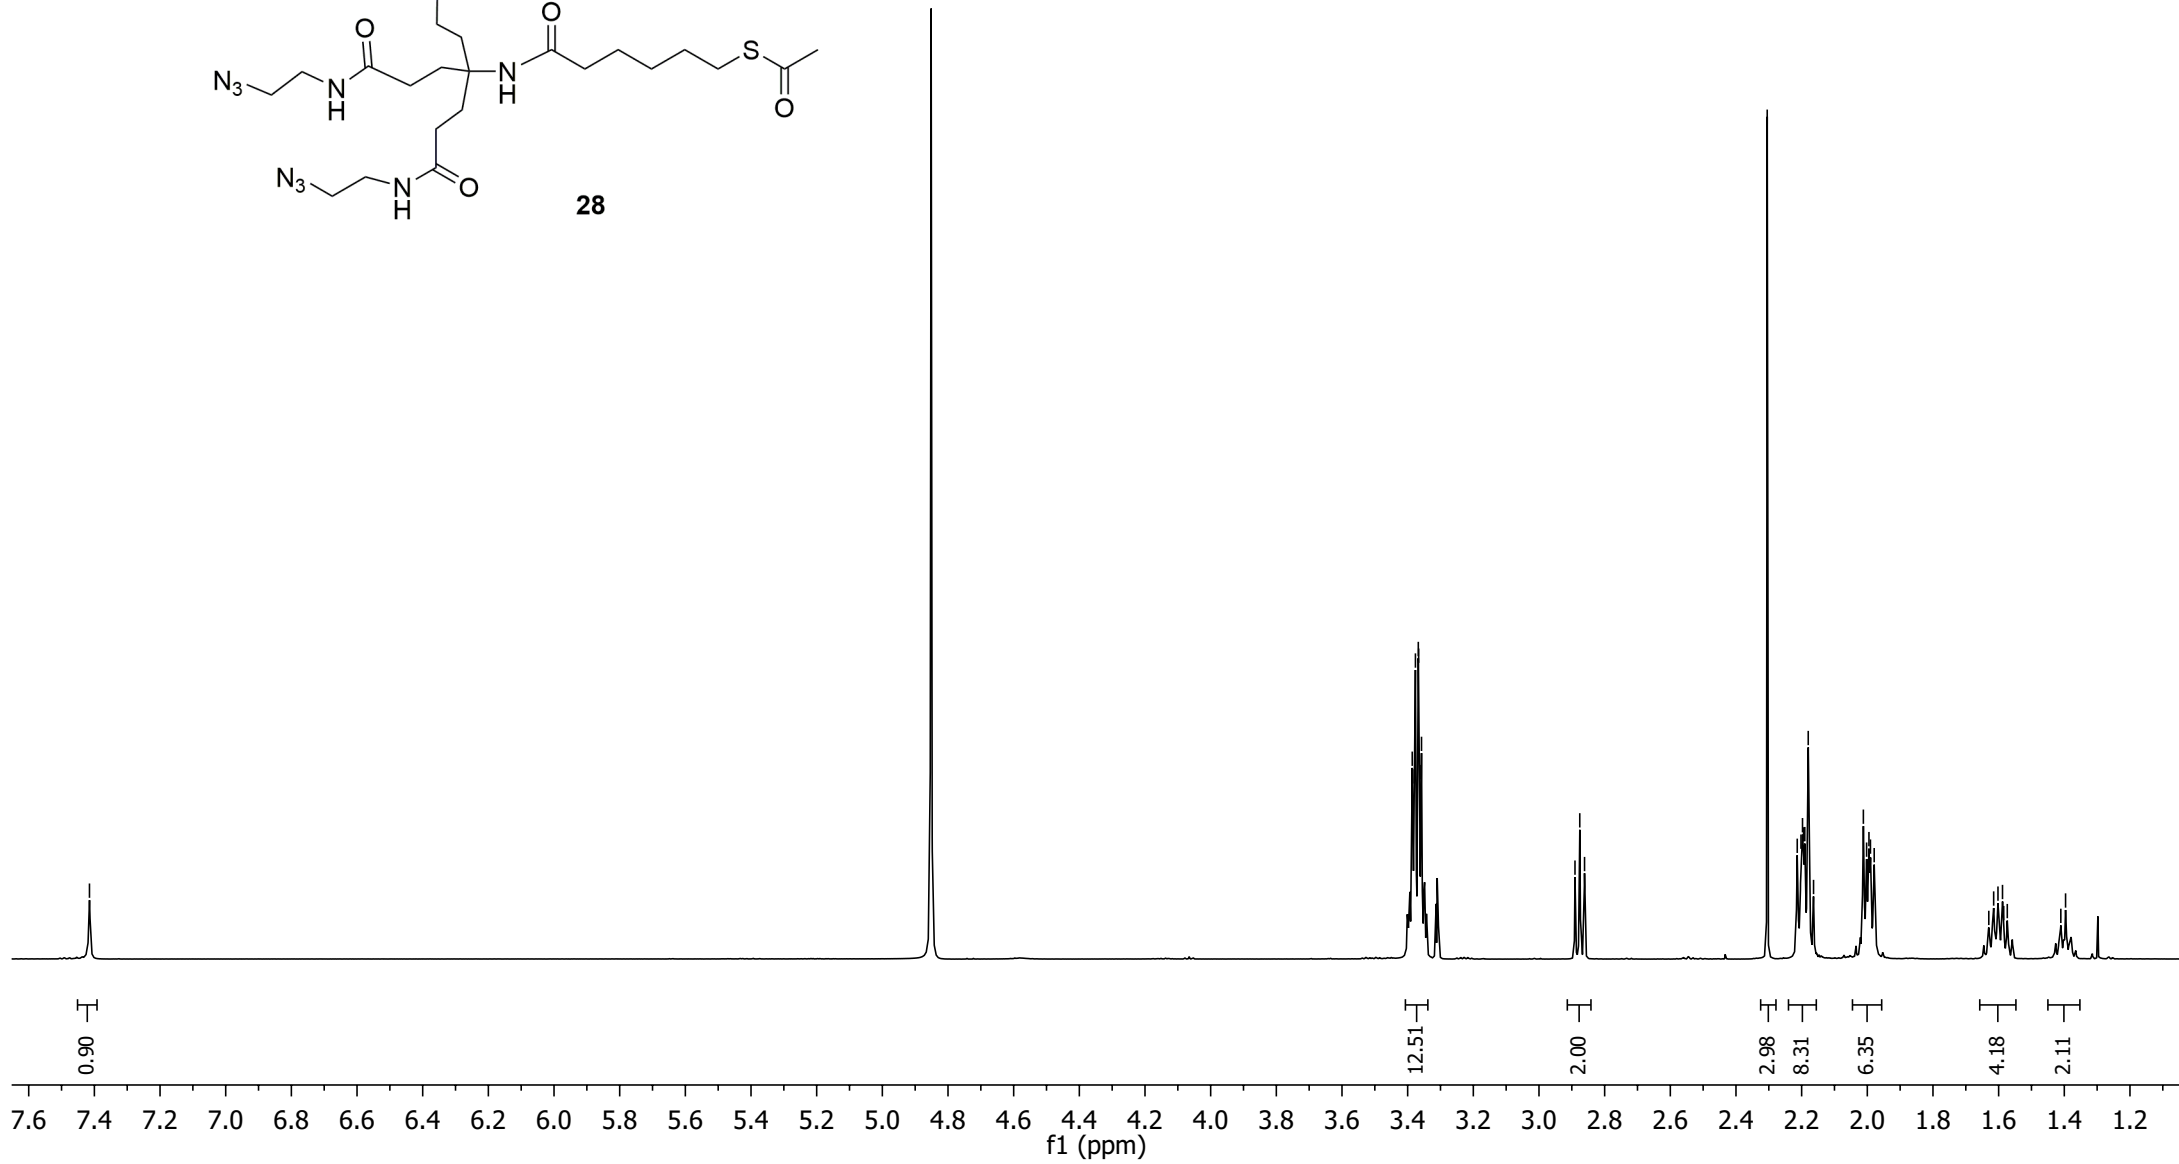

3.39  
3.38  
3.38  
3.37  
3.37  
3.36  
3.36  
2.89  
2.88  
2.86  
2.30  
2.21  
2.20  
2.20  
2.19  
2.19  
2.18  
2.16  
2.01  
2.00  
1.99  
1.99  
1.98  
1.63  
1.62  
1.60  
1.59  
1.58  
1.57  
1.41  
1.40

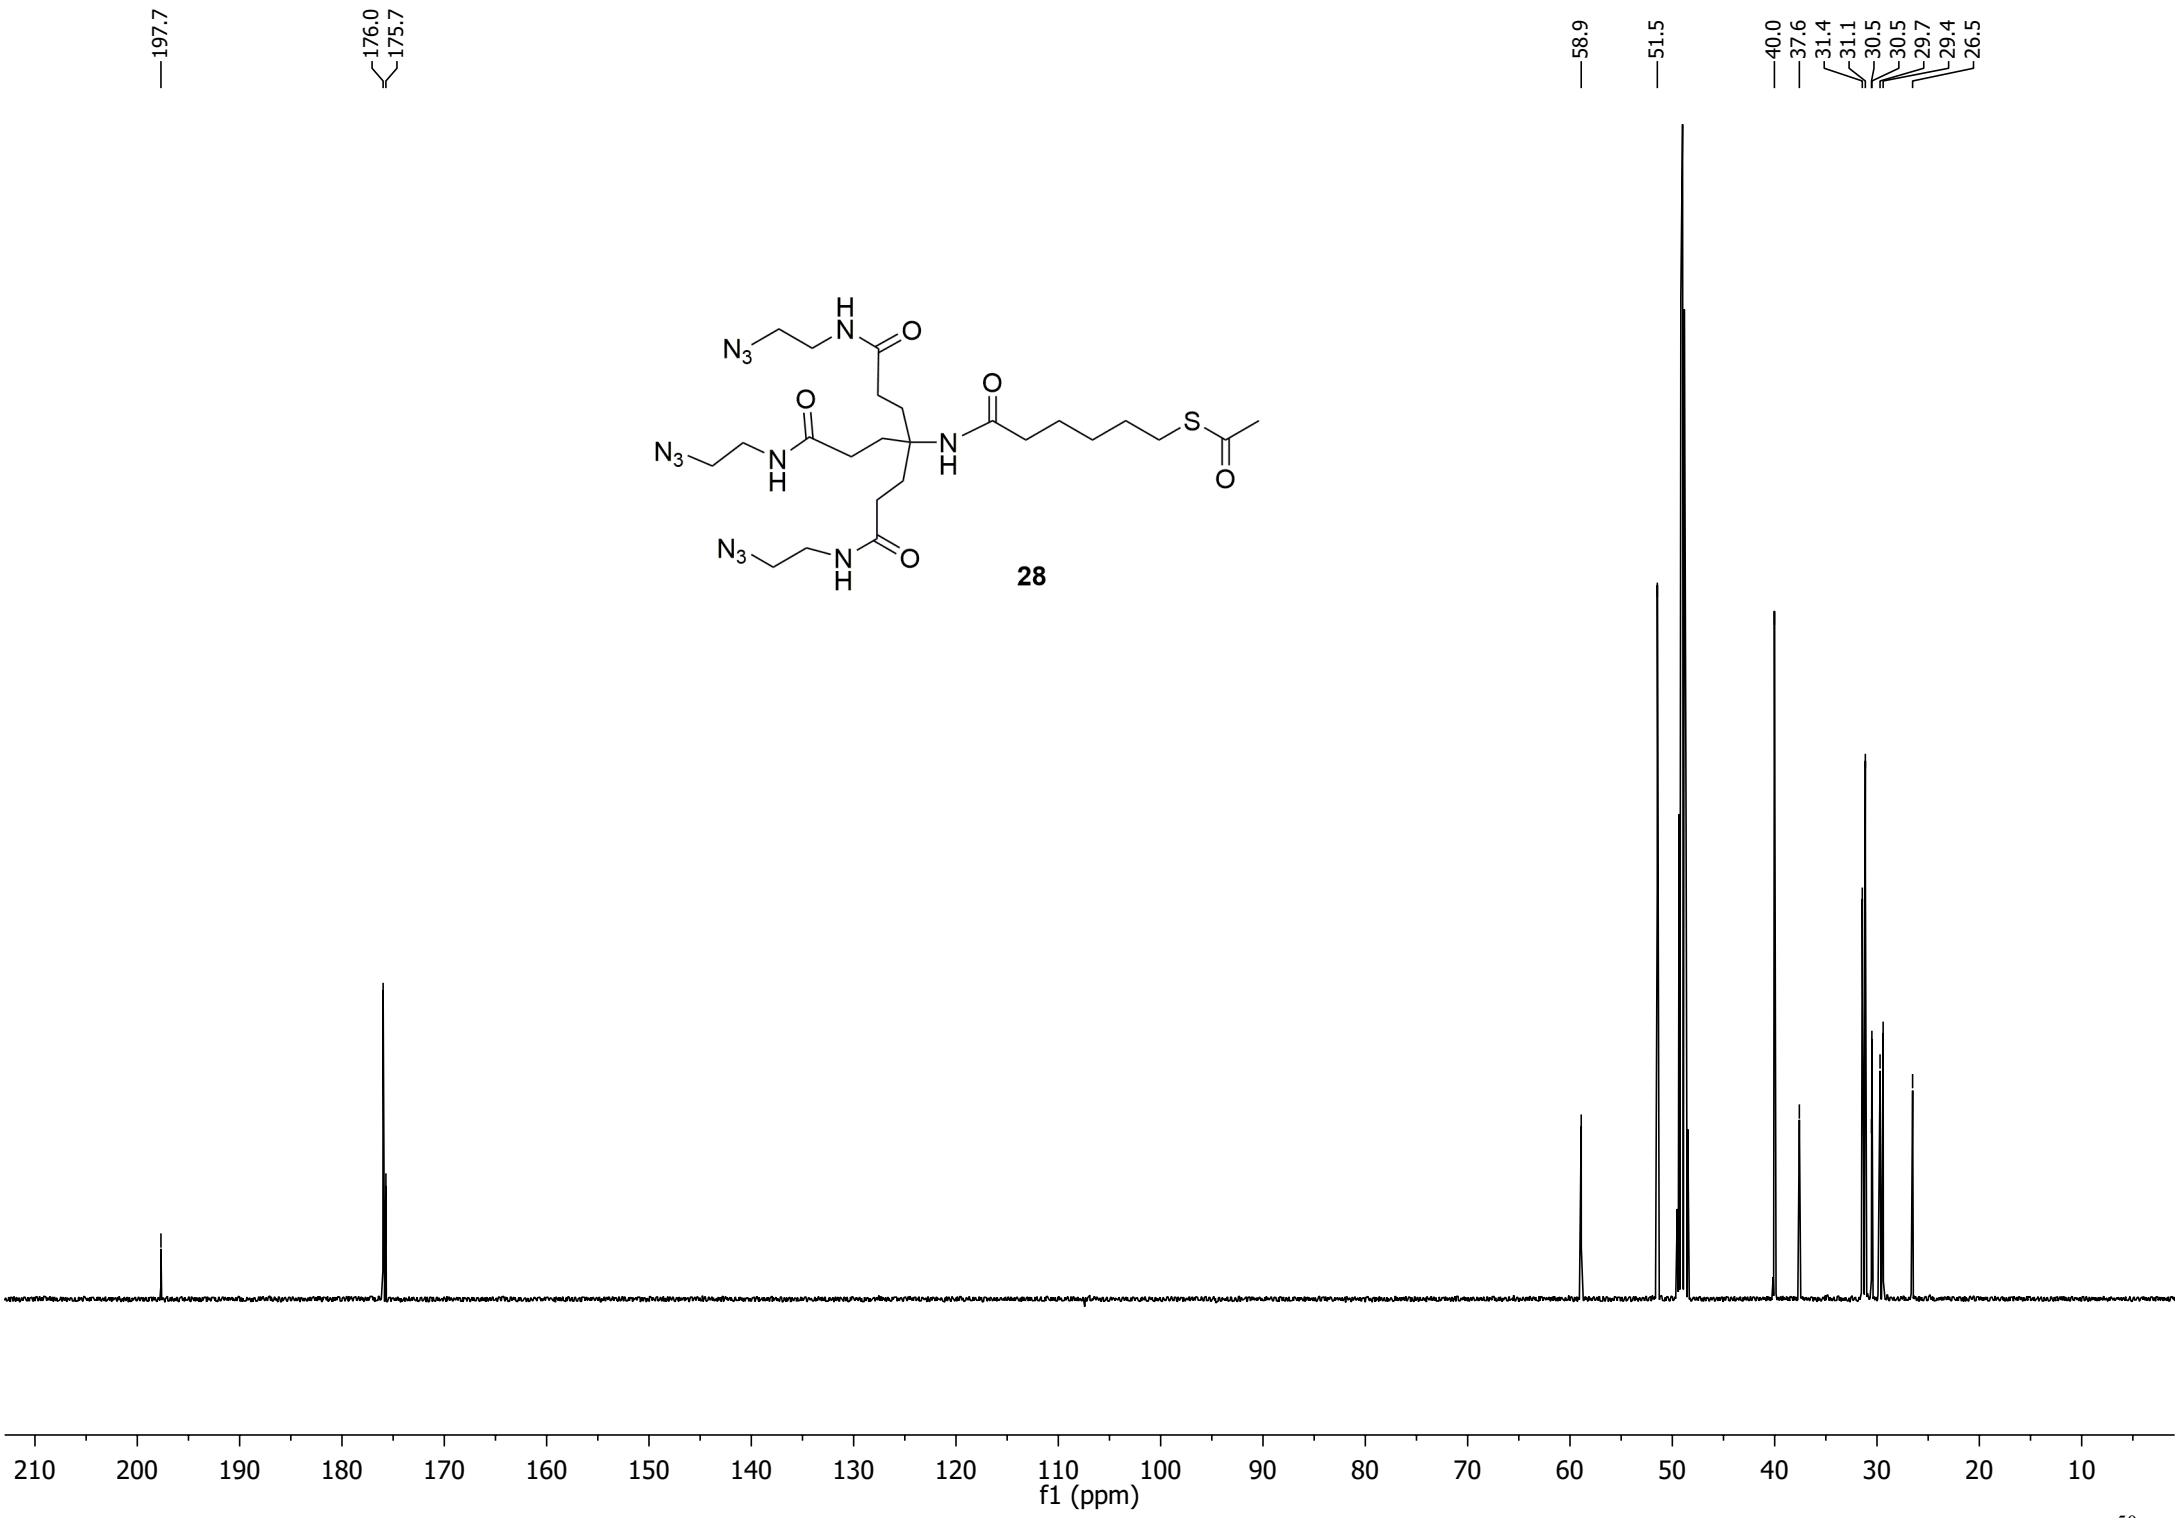



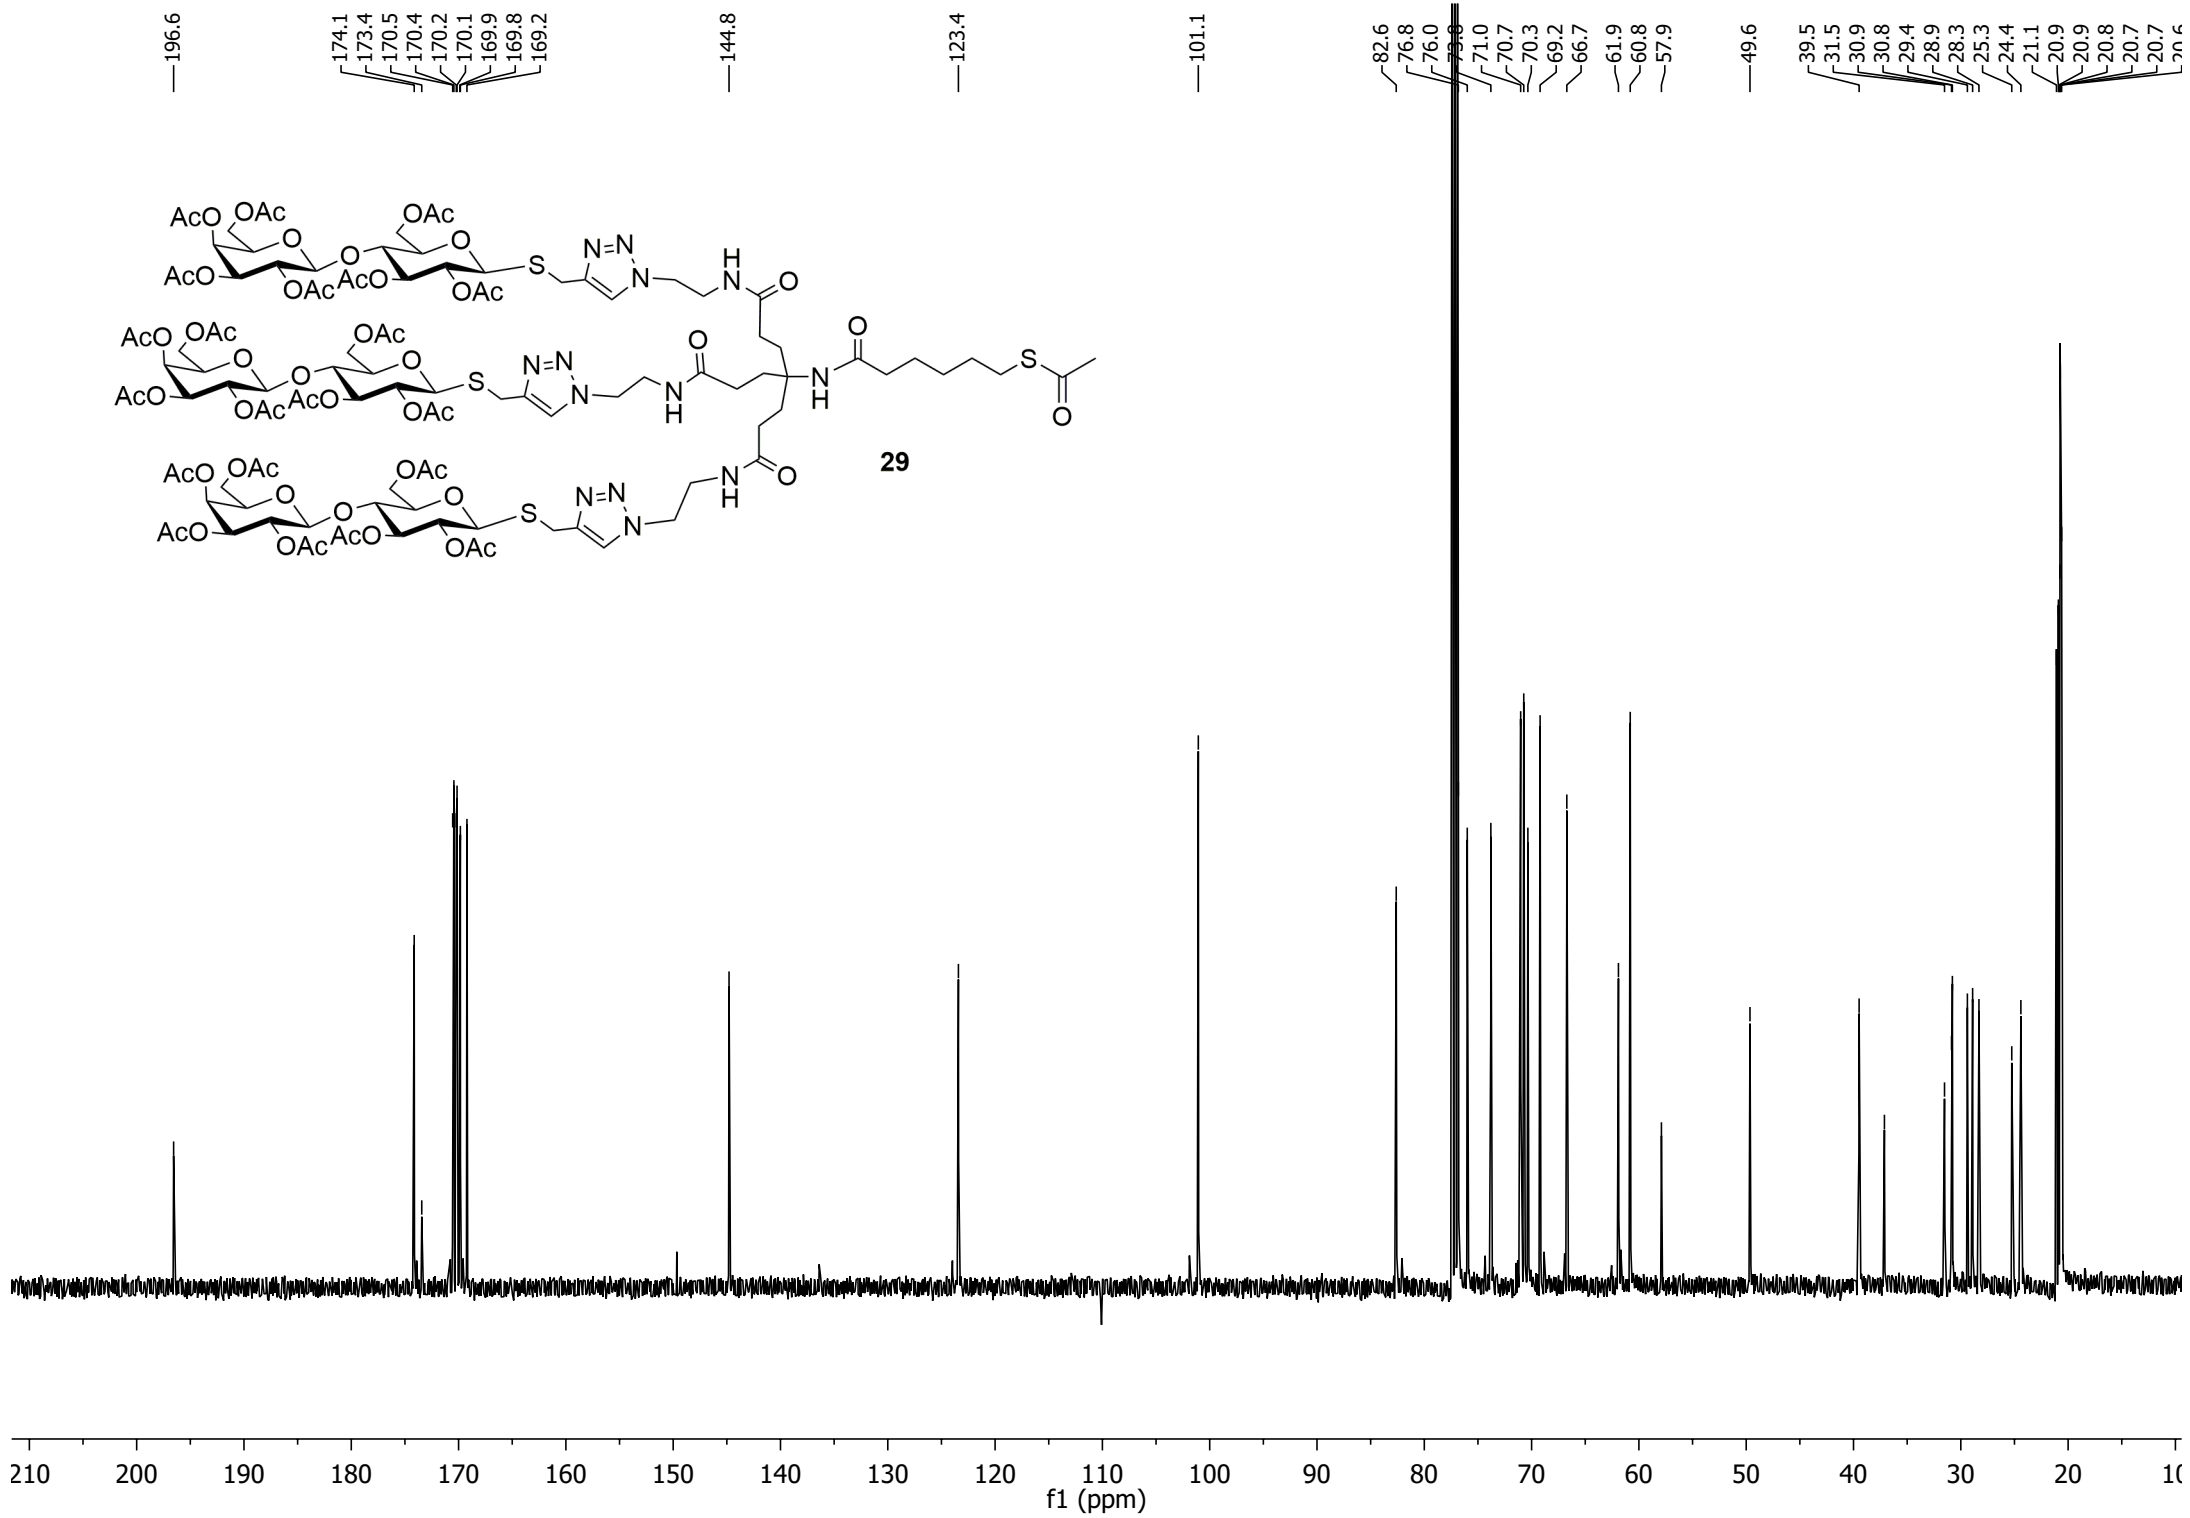

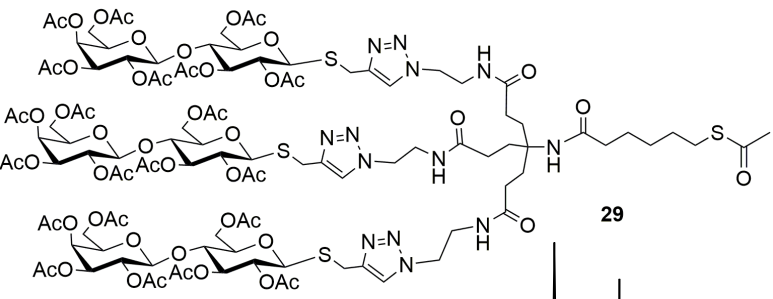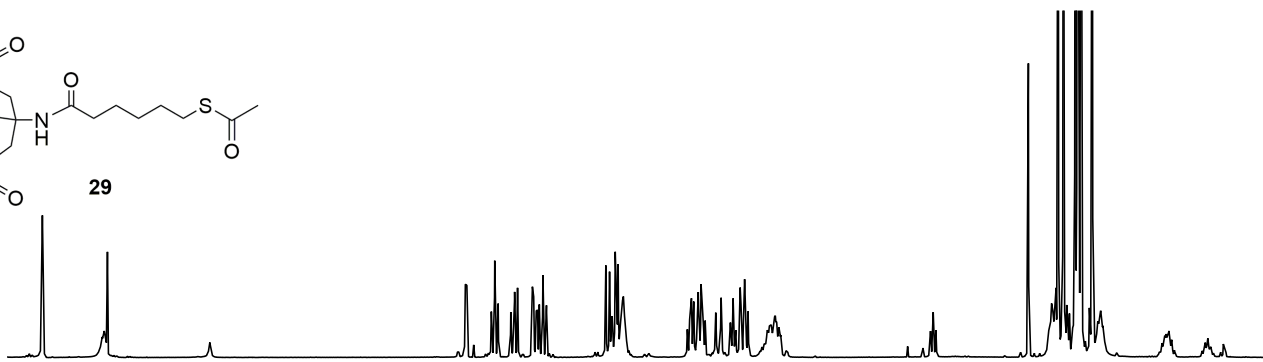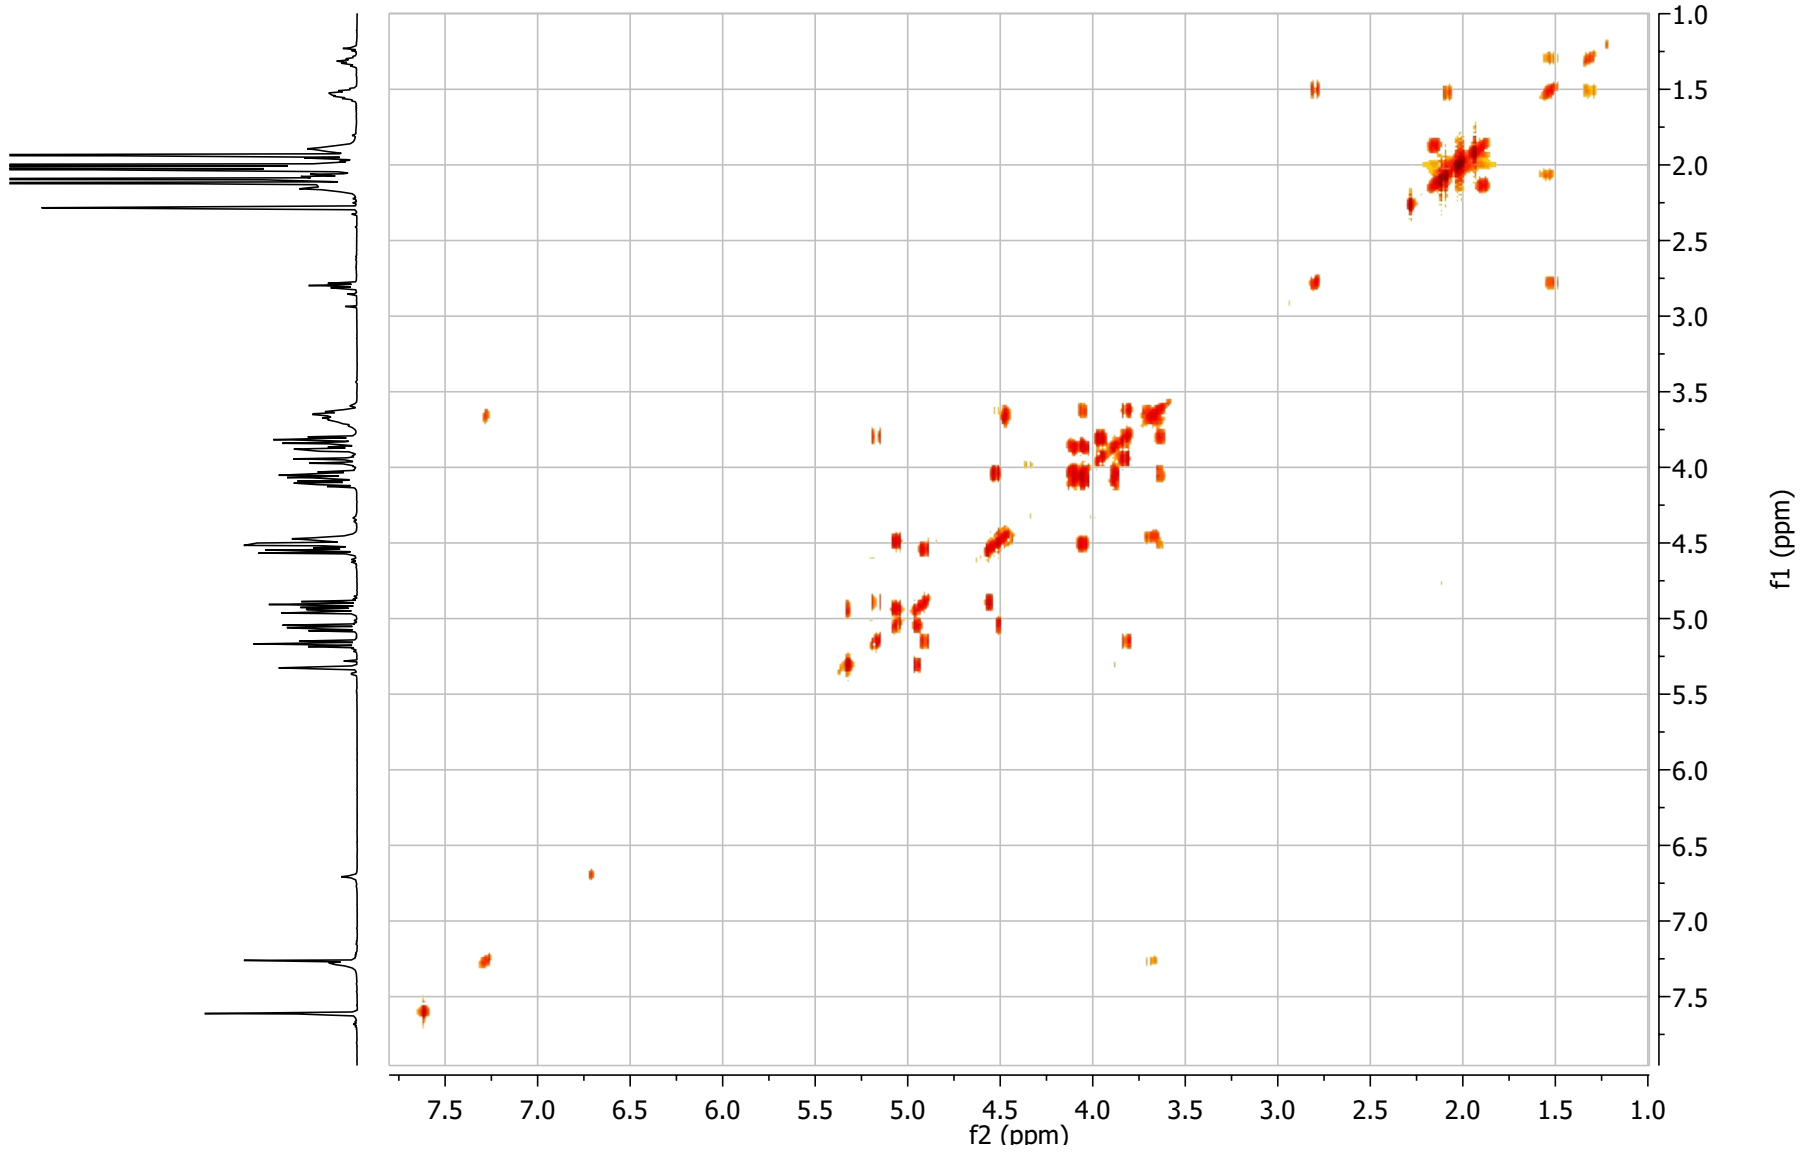

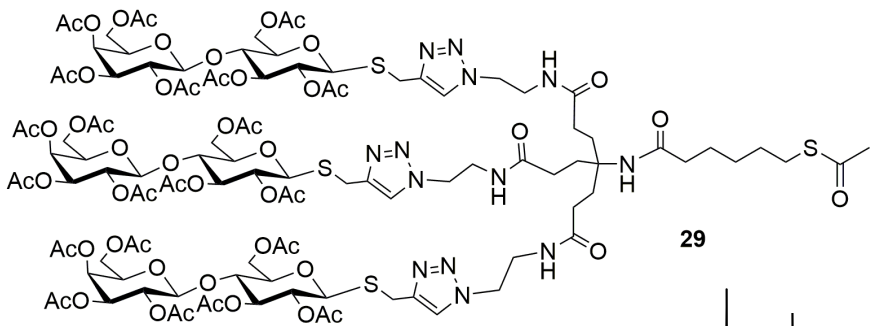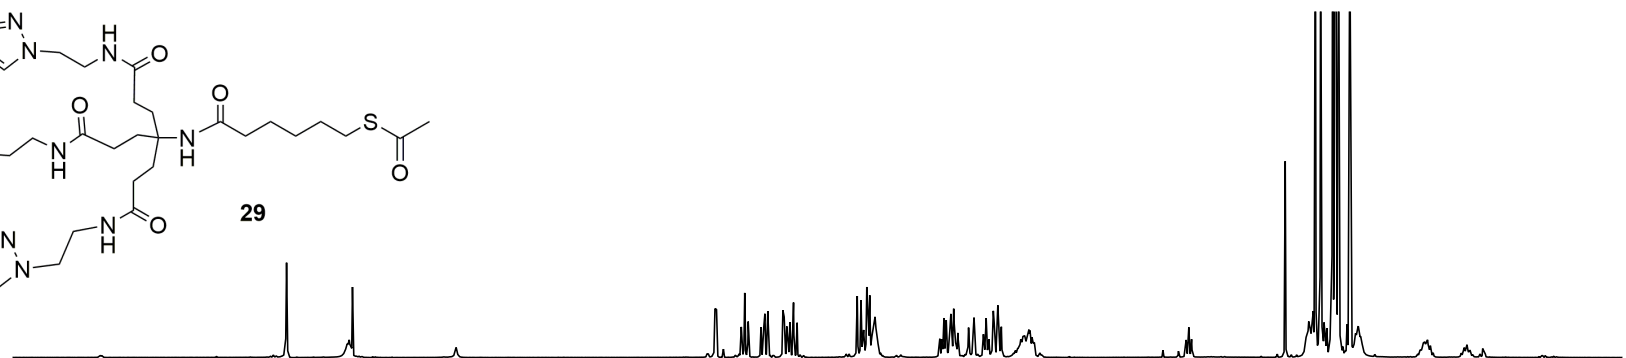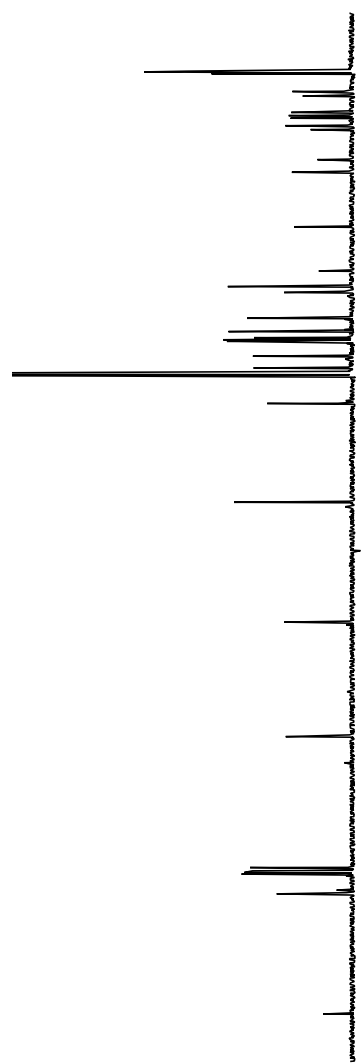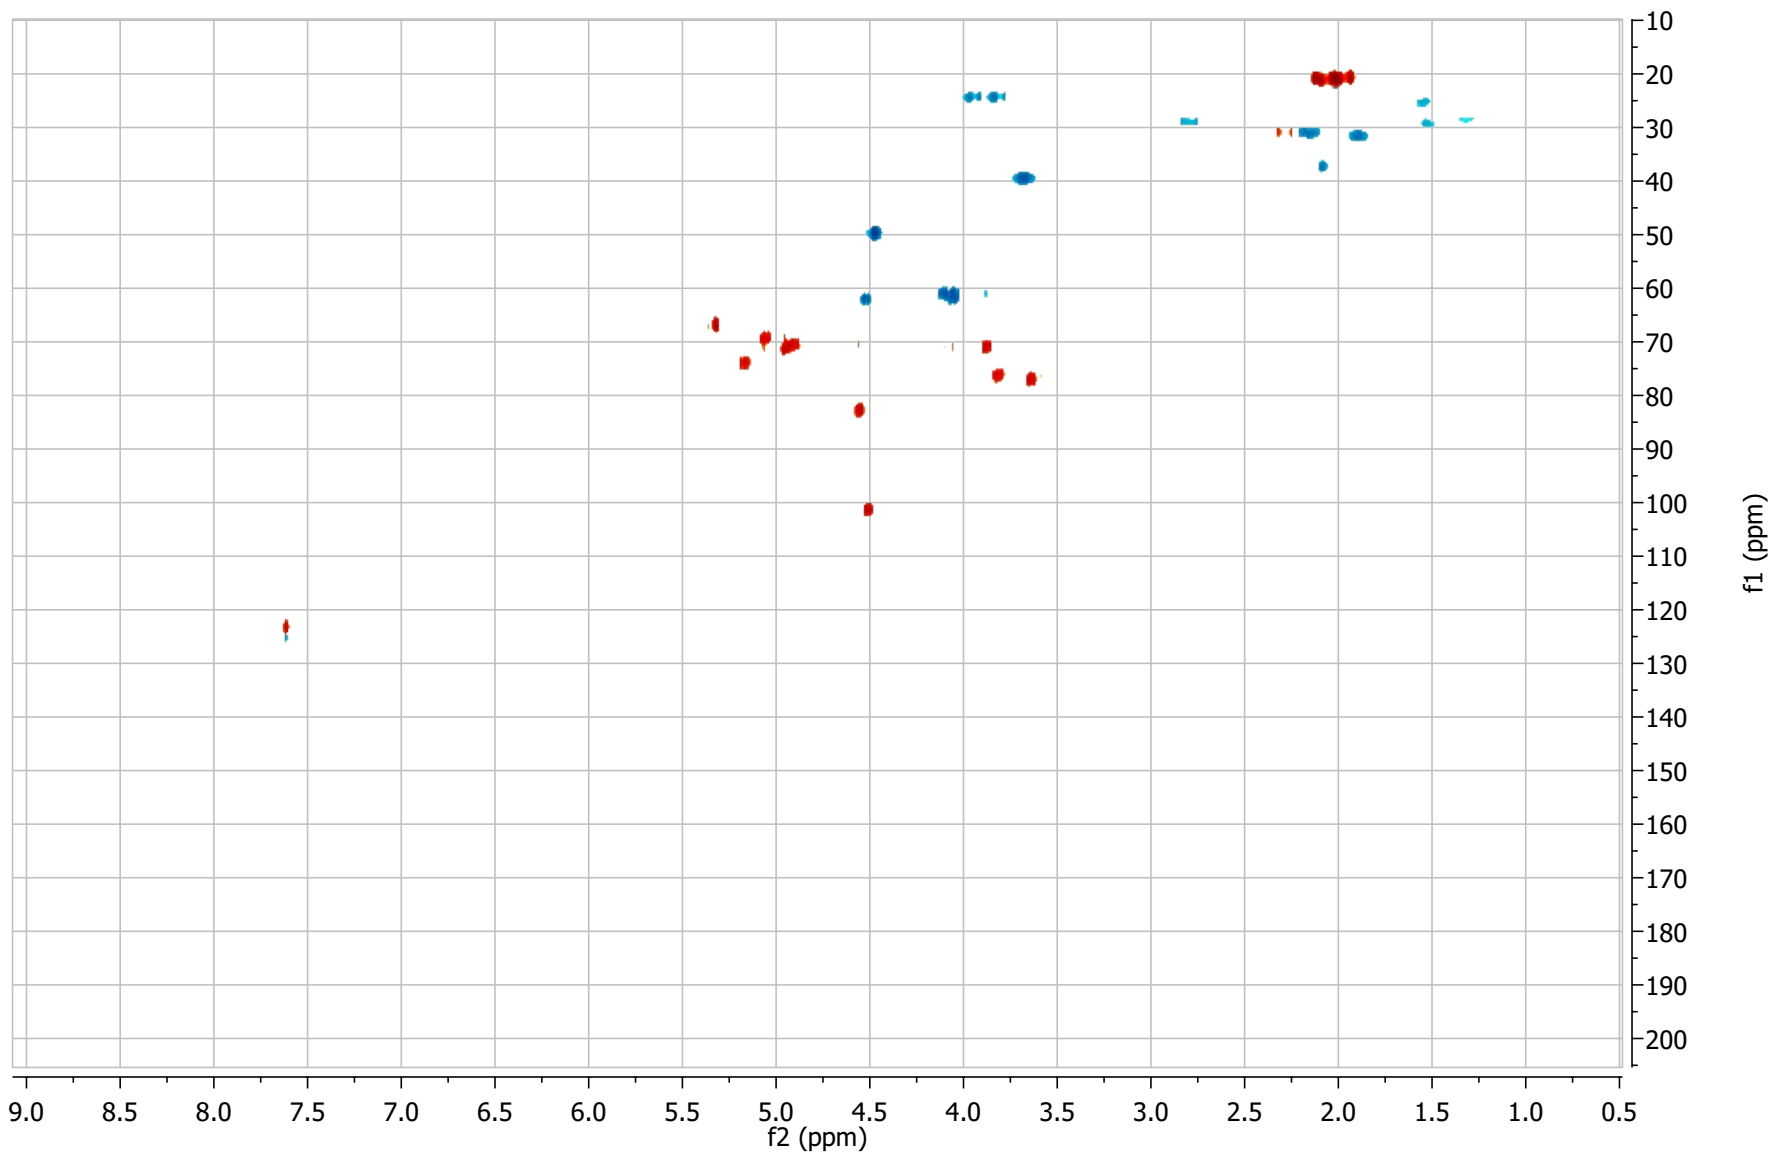

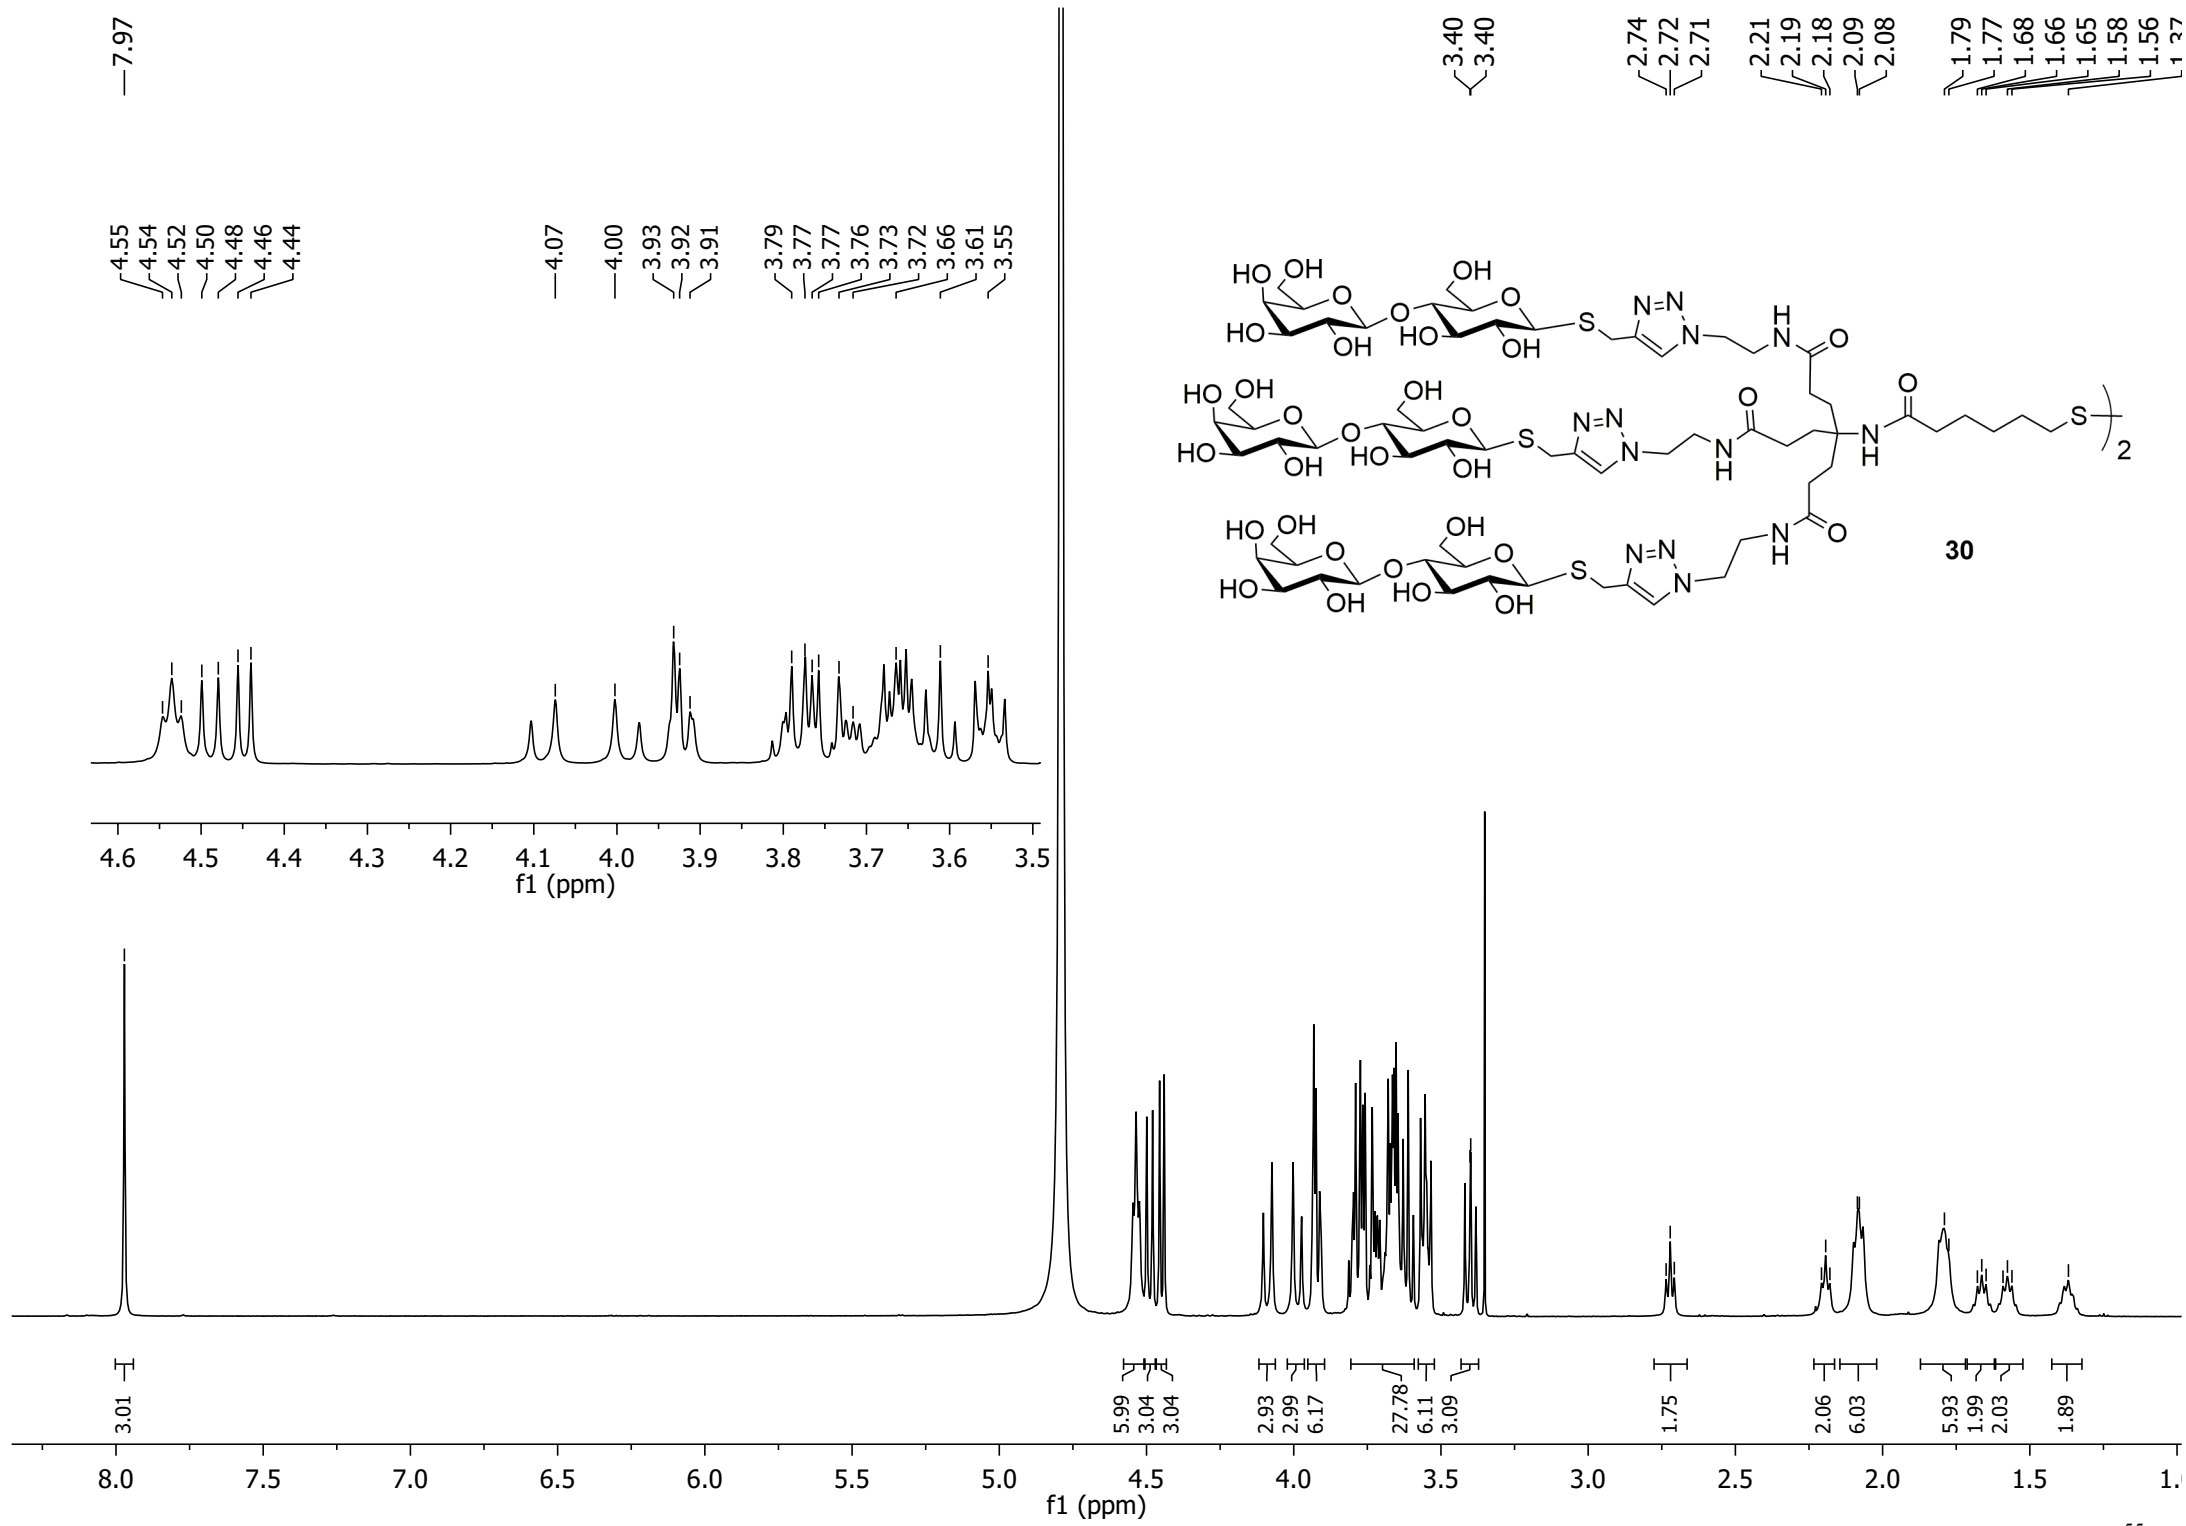

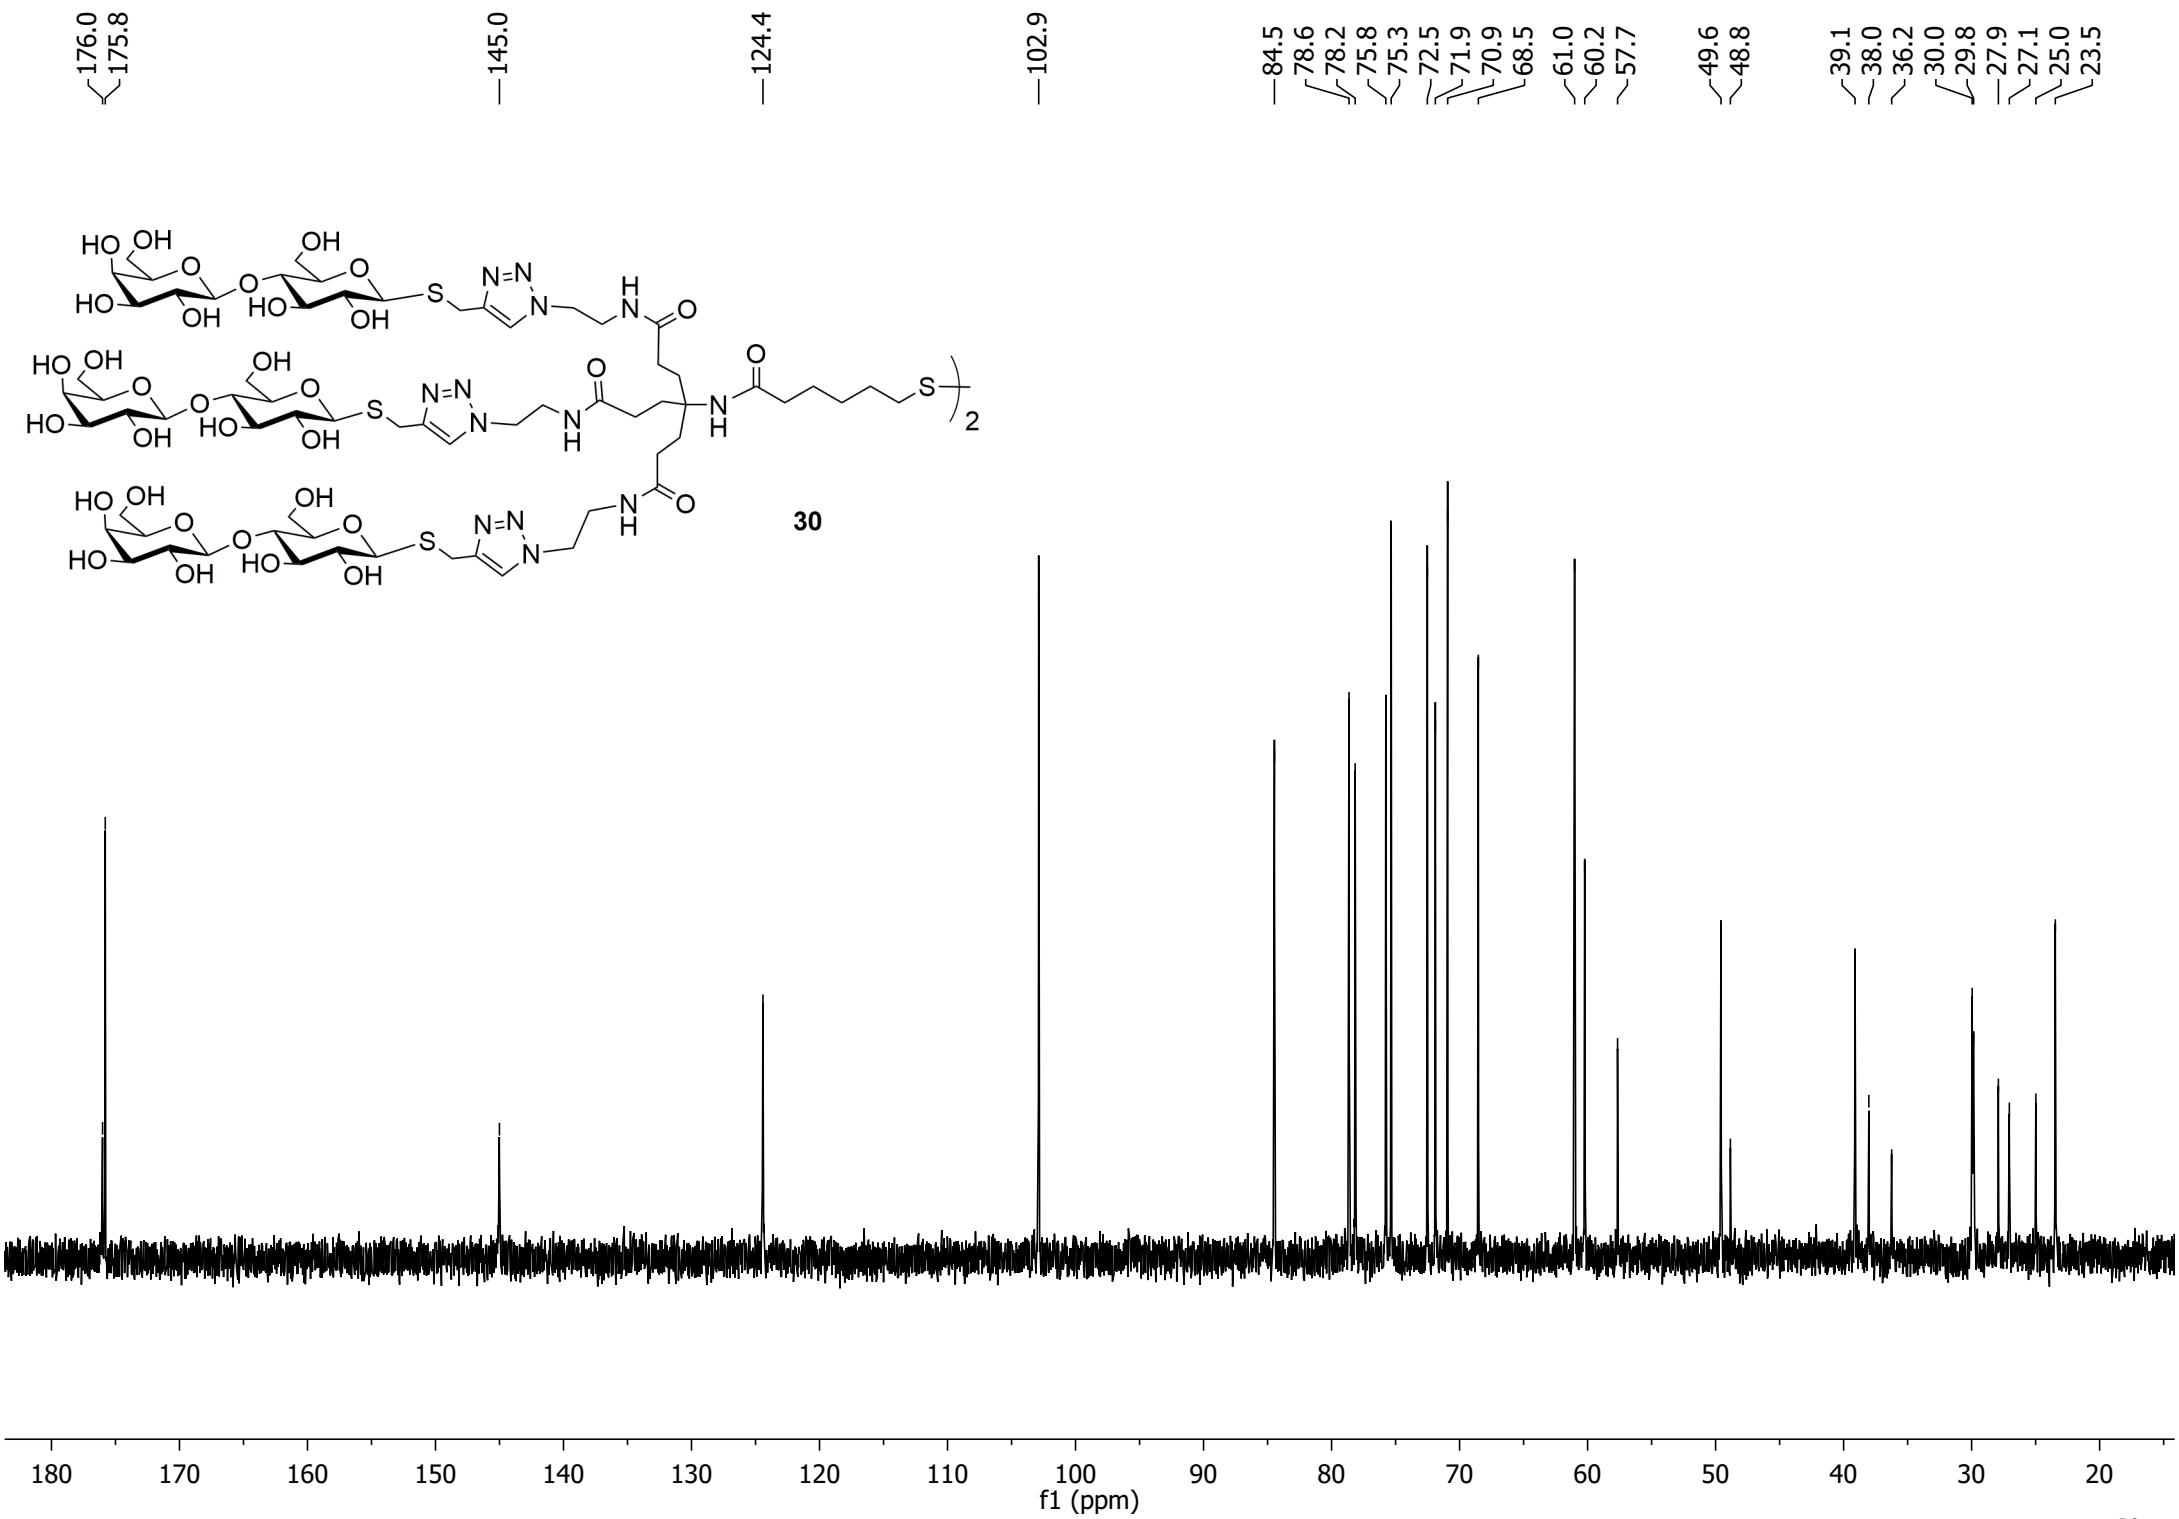

Supplement: d2nj03071c1.pdf [file d2nj03071c1.pdf]
